# Supplementary material for: Translation and codon usage regulate Argonaute slicer activity to trigger small RNA biogenesis
Source: Research Square preprint supplement (doi:10.21203/rs.3.rs-87655/v1), 2020-10-23
Supplement: Supplementary file 1 [file ffe8e17938db603ad6a96672.xlsx]

## Sheet: Supplementary Table 1
Supplementary Table 1. Gene lists generated and used in this study
genelist	criteria
CSR-1 targets ≥ 1 RPM	≥ 1 RPM in IP and log2FC (IP/Input) ≥ 1
CSR-1 targets ≥ 50 RPM	≥ 50 RPM in IP and log2FC (IP/Input) ≥ 1
CSR-1 targets ≥ 150 RPM	≥ 150 RPM in IP and log2FC (IP/Input) ≥ 1
CSR-1 targets downregulated in CSR-1 KO compared to CSR-1 catalytic mutant	log2FC ≤ -0.5 in GRO-seq CSR-1 KO vs CSR-1 ADH
HRDE-1 loaded P granule dependent piRNA targets	≥ 1 RPM in IP and log2FC (IP/Input) ≥ 0.5 AND log2FC (P granule RNAi/control) ≤ -2 AND piRNA-dependent 22G-RNA protein-coding targets (Barucci et.al., 2020)							gene list used for RSCU based on translation efficiency
CSR-1 targets ≥ 1 RPM at Late L4 stage	CSR-1 targets ≥ 50 RPM at Late L4 stage	CSR-1 targets ≥ 150 RPM at Late L4 stage	piRNA-dependent 22G-RNA protein-coding targets (Barucci et.al., 2020)	oogenic, Ortiz et. al, 2014	CSR-1 targets downregulated (≤ log2 -0.5) in CSR-1 KO compared to CSR-1 catalytic mutant	HRDE-1 loaded P granule dependent piRNA targets	genes encoding for tRNAs	Log2 TE ≥ 3	Log2 TE ≥ 2	Log2 TE ≥ 1	Log2 TE = 0 ± 0.1	Log2 TE ≤ -1	Log2 TE ≤ -2	Log2 TE ≤ -3	Ribosomal and translatin associated proteins present in IP-MS/MS data (identied by ontology analysis)	germ-granule and RNAi related factors presemt in IP-MS/MS data (identifued by ontology analysis)
WBGene00012896	WBGene00012896	WBGene00012896	WBGene00000075	WBGene00000004	WBGene00002226	WBGene00018433	WBGene00014339	WBGene00013887	WBGene00013887	WBGene00013887	WBGene00003580	WBGene00016373	WBGene00009592	WBGene00011970	WBGene00044321	WBGene00000105
WBGene00002219	WBGene00002219	WBGene00002219	WBGene00000081	WBGene00000018	WBGene00002228	WBGene00020778	WBGene00022986	WBGene00003456	WBGene00003456	WBGene00001755	WBGene00021016	WBGene00020020	WBGene00017985	WBGene00001393	WBGene00022765	WBGene00000106
WBGene00000549	WBGene00000549	WBGene00000549	WBGene00000089	WBGene00000073	WBGene00002225	WBGene00016937	WBGene00022963	WBGene00022005	WBGene00020937	WBGene00018497	WBGene00018082	WBGene00007584	WBGene00011970	WBGene00006732	WBGene00022739	WBGene00000369
WBGene00017482	WBGene00017482	WBGene00017482	WBGene00000112	WBGene00000074	WBGene00009113	WBGene00013698	WBGene00022942	WBGene00022023	WBGene00018121	WBGene00009981	WBGene00194697	WBGene00008275	WBGene00022221	WBGene00018923	WBGene00022373	WBGene00000479
WBGene00010785	WBGene00010785	WBGene00010785	WBGene00000121	WBGene00000075	WBGene00001829	WBGene00020473	WBGene00014337	WBGene00018997	WBGene00015193	WBGene00009514	WBGene00044247	WBGene00016516	WBGene00003912	WBGene00009245	WBGene00022232	WBGene00000939
WBGene00002036	WBGene00002036	WBGene00002036	WBGene00000178	WBGene00000092	WBGene00020588	WBGene00000554	WBGene00014331	WBGene00009938	WBGene00007449	WBGene00044475	WBGene00007632	WBGene00004215	WBGene00020467	WBGene00003864	WBGene00022046	WBGene00001090
WBGene00013729	WBGene00013729	WBGene00013729	WBGene00000207	WBGene00000094	WBGene00006817	WBGene00013802	WBGene00012653	WBGene00000878	WBGene00009954	WBGene00010272	WBGene00022889	WBGene00013357	WBGene00001393	WBGene00006483	WBGene00021920	WBGene00001214
WBGene00001601	WBGene00001601	WBGene00001601	WBGene00000210	WBGene00000095	WBGene00002994	WBGene00020407	WBGene00014281	WBGene00011319	WBGene00006047	WBGene00235313	WBGene00010895	WBGene00016357	WBGene00006732	WBGene00003562	WBGene00021857	WBGene00001402
WBGene00022069	WBGene00022069	WBGene00022069	WBGene00000222	WBGene00000106	WBGene00020652	WBGene00021095	WBGene00014265	WBGene00019084	WBGene00013696	WBGene00017910	WBGene00016587	WBGene00013702	WBGene00001606	WBGene00019831	WBGene00021843	WBGene00001569
WBGene00020464	WBGene00020464	WBGene00020464	WBGene00000224	WBGene00000120	WBGene00020035	WBGene00004227	WBGene00022907	WBGene00022214	WBGene00003079	WBGene00001646	WBGene00011705	WBGene00011378	WBGene00011352	WBGene00000867	WBGene00021830	WBGene00001584
WBGene00017641	WBGene00017641	WBGene00017641	WBGene00000237	WBGene00000137	WBGene00022257	WBGene00013622	WBGene00022973	WBGene00022884	WBGene00008576	WBGene00003456	WBGene00006645	WBGene00009592	WBGene00017548	WBGene00000913	WBGene00021789	WBGene00001595
WBGene00003218	WBGene00003218	WBGene00003218	WBGene00000294	WBGene00000146	WBGene00004374	WBGene00012412	WBGene00014326	WBGene00022875	WBGene00022005	WBGene00020937	WBGene00012787	WBGene00008991	WBGene00008219	WBGene00004078	WBGene00021697	WBGene00001596
WBGene00007624	WBGene00007624	WBGene00007624	WBGene00000387	WBGene00000147	WBGene00001110	WBGene00009280	WBGene00022898	WBGene00020285	WBGene00017321	WBGene00020468	WBGene00009217	WBGene00001439	WBGene00018923	WBGene00008274	WBGene00021476	WBGene00001597
WBGene00010263	WBGene00010263	WBGene00010263	WBGene00000393	WBGene00000156	WBGene00001831	WBGene00010011	WBGene00022930	WBGene00000620	WBGene00022268	WBGene00044498	WBGene00001249	WBGene00018594	WBGene00007167	WBGene00012879	WBGene00021466	WBGene00001598
WBGene00011562	WBGene00011562	WBGene00011562	WBGene00000407	WBGene00000157	WBGene00003421	WBGene00016931	WBGene00022988	WBGene00015165	WBGene00014170	WBGene00011756	WBGene00007435	WBGene00009190	WBGene00018364	WBGene00004984	WBGene00021351	WBGene00001599
WBGene00022531	WBGene00022531	WBGene00022531	WBGene00000409	WBGene00000161	WBGene00003052	WBGene00006494	WBGene00022905	WBGene00000688	WBGene00022864	WBGene00016399	WBGene00008874	WBGene00017829	WBGene00009701	WBGene00000496	WBGene00021350	WBGene00001600
WBGene00009374	WBGene00009374	WBGene00009374	WBGene00000443	WBGene00000162	WBGene00012897	WBGene00017979	WBGene00014276	WBGene00050893	WBGene00007216	WBGene00000797	WBGene00015522	WBGene00017985	WBGene00015009	WBGene00013021	WBGene00021327	WBGene00001601
WBGene00002226	WBGene00002226	WBGene00002226	WBGene00000460	WBGene00000163	WBGene00012148	WBGene00020018	WBGene00014289	WBGene00012180	WBGene00022023	WBGene00006721	WBGene00003612	WBGene00004954	WBGene00001647	WBGene00007709	WBGene00021281	WBGene00002059
WBGene00002228	WBGene00002228	WBGene00002228	WBGene00000462	WBGene00000164	WBGene00010351	WBGene00021096	WBGene00022971	WBGene00044275	WBGene00018997	WBGene00018358	WBGene00008232	WBGene00004111	WBGene00020948	WBGene00000465	WBGene00021276	WBGene00002244
WBGene00002225	WBGene00002225	WBGene00002225	WBGene00000463	WBGene00000168	WBGene00008035	WBGene00016997	WBGene00022920	WBGene00003430	WBGene00194642	WBGene00018121	WBGene00007794	WBGene00044158	WBGene00019079	WBGene00011320	WBGene00021088	WBGene00003150
WBGene00002047	WBGene00002047	WBGene00002047	WBGene00000497	WBGene00000189	WBGene00009035	WBGene00019909	WBGene00013386	WBGene00017485	WBGene00009938	WBGene00007478	WBGene00006710	WBGene00019095	WBGene00016501	WBGene00015102	WBGene00021074	WBGene00003228
WBGene00013106	WBGene00013106	WBGene00013106	WBGene00000514	WBGene00000192	WBGene00008921	WBGene00010242	WBGene00022990	WBGene00045209	WBGene00012357	WBGene00015193	WBGene00016081	WBGene00011970	WBGene00001396	WBGene00009285	WBGene00021073	WBGene00003229
WBGene00000123	WBGene00000123	WBGene00000123	WBGene00000518	WBGene00000195	WBGene00004239	WBGene00010262	WBGene00022944	WBGene00016845	WBGene00000878	WBGene00044393	WBGene00012790	WBGene00001985	WBGene00003395	WBGene00009587	WBGene00021021	WBGene00003230
WBGene00008848	WBGene00008848	WBGene00008848	WBGene00000534	WBGene00000222	WBGene00001599	WBGene00021653	WBGene00022896	WBGene00011103	WBGene00012807	WBGene00086554	WBGene00008662	WBGene00016402	WBGene00011318	WBGene00004179	WBGene00020915	WBGene00003231
WBGene00002229	WBGene00002229	WBGene00002229	WBGene00000535	WBGene00000262	WBGene00011061	WBGene00019044	WBGene00014303	WBGene00043187	WBGene00012029	WBGene00015483	WBGene00000289	WBGene00003396	WBGene00018848	WBGene00006988	WBGene00020718	WBGene00003499
WBGene00001977	WBGene00001977	WBGene00001977	WBGene00000543	WBGene00000289	WBGene00007504	WBGene00012299	WBGene00014280	WBGene00001905	WBGene00044634	WBGene00007449	WBGene00012363	WBGene00008148	WBGene00007332	WBGene00004239	WBGene00020297	WBGene00003504
WBGene00007505	WBGene00007505	WBGene00007505	WBGene00000545	WBGene00000292	WBGene00004874	WBGene00007941	WBGene00007475	WBGene00017488	WBGene00011319	WBGene00009954	WBGene00007320	WBGene00013261	WBGene00004110	WBGene00009035	WBGene00020269	WBGene00003507
WBGene00019600	WBGene00019600	WBGene00019600	WBGene00000546	WBGene00000301	WBGene00003155	WBGene00004352	WBGene00014026	WBGene00020599	WBGene00012996	WBGene00002120	WBGene00015628	WBGene00021082	WBGene00000168	WBGene00010351	WBGene00020037	WBGene00003508
WBGene00014208	WBGene00014208	WBGene00014208	WBGene00000554	WBGene00000382	WBGene00006740	WBGene00021039	WBGene00014325	WBGene00003462	WBGene00021331	WBGene00018808	WBGene00022857	WBGene00006618	WBGene00009245	WBGene00004374	WBGene00019698	WBGene00003582
WBGene00000197	WBGene00000197	WBGene00000197	WBGene00000564	WBGene00000383	WBGene00001973	WBGene00015115	WBGene00022987	WBGene00044274	WBGene00021548	WBGene00014007	WBGene00020265	WBGene00020114	WBGene00003221	WBGene00020035	WBGene00019678	WBGene00003598
WBGene00004094	WBGene00004094	WBGene00004094	WBGene00000636	WBGene00000386	WBGene00003410	WBGene00000545	WBGene00022921	WBGene00014042	WBGene00004451	WBGene00006047	WBGene00015939	WBGene00019010	WBGene00001499	WBGene00020652	WBGene00019543	WBGene00003796
WBGene00013156	WBGene00013156	WBGene00013156	WBGene00000762	WBGene00000387	WBGene00003158	WBGene00015488	WBGene00022962	WBGene00077764	WBGene00013449	WBGene00017175	WBGene00008581	WBGene00009948	WBGene00010815	WBGene00002368	WBGene00019168	WBGene00003864
WBGene00000962	WBGene00000962	WBGene00000962	WBGene00000787	WBGene00000388	WBGene00007445	WBGene00009657	WBGene00022958	WBGene00219383	WBGene00022760	WBGene00012294	WBGene00017555	WBGene00009272	WBGene00045484	WBGene00044789	WBGene00019162	WBGene00003865
WBGene00020463	WBGene00020463	WBGene00020463	WBGene00000795	WBGene00000393	WBGene00002073	WBGene00013244	WBGene00012350	WBGene00018669	WBGene00008994	WBGene00015696	WBGene00004342	WBGene00018235	WBGene00021561	WBGene00002225	WBGene00018961	WBGene00003901
WBGene00004737	WBGene00004737	WBGene00004737	WBGene00000803	WBGene00000395	WBGene00015102	WBGene00015614	WBGene00022979	WBGene00001912	WBGene00003448	WBGene00011500	WBGene00077543	WBGene00011858	WBGene00012716	WBGene00002226	WBGene00018898	WBGene00003902
WBGene00021465	WBGene00021465	WBGene00021465	WBGene00000812	WBGene00000396	WBGene00086551	WBGene00006384	WBGene00022917	WBGene00000621	WBGene00016808	WBGene00044794	WBGene00015190	WBGene00019806	WBGene00015237	WBGene00020859	WBGene00018893	WBGene00003915
WBGene00004178	WBGene00004178	WBGene00004178	WBGene00000819	WBGene00000406	WBGene00000868	WBGene00007395	WBGene00022974	WBGene00007544	WBGene00003434	WBGene00009745	WBGene00017358	WBGene00021841	WBGene00019628	WBGene00007275	WBGene00018891	WBGene00003992
WBGene00001598	WBGene00001598	WBGene00001598	WBGene00000821	WBGene00000409	WBGene00000386	WBGene00012570	WBGene00022946	WBGene00001943	WBGene00022357	WBGene00011132	WBGene00002215	WBGene00015670	WBGene00010840	WBGene00016825	WBGene00018866	WBGene00003993
WBGene00004952	WBGene00004952	WBGene00004952	WBGene00000857	WBGene00000411	WBGene00018950	WBGene00000535	WBGene00022916	WBGene00044175	WBGene00016054	WBGene00011119	WBGene00021123	WBGene00019879	WBGene00016421	WBGene00000652	WBGene00018846	WBGene00003994
WBGene00009113	WBGene00009113	WBGene00009113	WBGene00000903	WBGene00000413	WBGene00001683	WBGene00006353	WBGene00014285	WBGene00045208	WBGene00017750	WBGene00014225	WBGene00012136	WBGene00015421	WBGene00000866	WBGene00017741	WBGene00018762	WBGene00004027
WBGene00011333	WBGene00011333	WBGene00011333	WBGene00000912	WBGene00000414	WBGene00020168	WBGene00021428	WBGene00014338	WBGene00044271	WBGene00013854	WBGene00011351	WBGene00007225	WBGene00019606	WBGene00003864	WBGene00010813	WBGene00018612	WBGene00004046
WBGene00010621	WBGene00010621	WBGene00010621	WBGene00000938	WBGene00000416	WBGene00011320	WBGene00008782	WBGene00009206	WBGene00012591	WBGene00001155	WBGene00010878	WBGene00002129	WBGene00021766	WBGene00008140	WBGene00000140	WBGene00018339	WBGene00004093
WBGene00001829	WBGene00001829	WBGene00001829	WBGene00000995	WBGene00000417	WBGene00012395	WBGene00044639	WBGene00014329	WBGene00012840	WBGene00021312	WBGene00008860	WBGene00013142	WBGene00000150	WBGene00021035	WBGene00008901	WBGene00017319	WBGene00004094
WBGene00007789	WBGene00007789	WBGene00007789	WBGene00001008	WBGene00000420	WBGene00000479	WBGene00021369	WBGene00022993	WBGene00044273	WBGene00013987	WBGene00009250	WBGene00009489	WBGene00000094	WBGene00007637	WBGene00017921	WBGene00016607	WBGene00004132
WBGene00008740	WBGene00008740	WBGene00008740	WBGene00001025	WBGene00000422	WBGene00004241	WBGene00013198	WBGene00022924	WBGene00044340	WBGene00018120	WBGene00020557	WBGene00003014	WBGene00022791	WBGene00012369	WBGene00005529	WBGene00016496	WBGene00004178
WBGene00015817	WBGene00015817	WBGene00015817	WBGene00001042	WBGene00000443	WBGene00004726	WBGene00009558	WBGene00022911	WBGene00008967	WBGene00003446	WBGene00019007	WBGene00020867	WBGene00022221	WBGene00007698	WBGene00008997	WBGene00016493	WBGene00004241
WBGene00000405	WBGene00000405	WBGene00000405	WBGene00001044	WBGene00000444	WBGene00020107	WBGene00021353	WBGene00009936	WBGene00003766	WBGene00012739	WBGene00019298	WBGene00014203	WBGene00003912	WBGene00006562	WBGene00005528	WBGene00016057	WBGene00004244
WBGene00020588	WBGene00020588	WBGene00020588	WBGene00001177	WBGene00000459	WBGene00010847	WBGene00022592	WBGene00022936	WBGene00021086	WBGene00007239	WBGene00013696	WBGene00007772	WBGene00013686	WBGene00006483	WBGene00010768	WBGene00015941	WBGene00004324
WBGene00008107	WBGene00008107	WBGene00008107	WBGene00001178	WBGene00000460	WBGene00010042	WBGene00019858	WBGene00022983	WBGene00017305	WBGene00012926	WBGene00003079	WBGene00020007	WBGene00020467	WBGene00006804	WBGene00016354	WBGene00015920	WBGene00004326
WBGene00014151	WBGene00014151	WBGene00014151	WBGene00001188	WBGene00000461	WBGene00004781	WBGene00022726	WBGene00022957	WBGene00012604	WBGene00017360	WBGene00016452	WBGene00006625	WBGene00019562	WBGene00006406	WBGene00001394	WBGene00015809	WBGene00004508
WBGene00002032	WBGene00002032	WBGene00002032	WBGene00001189	WBGene00000462	WBGene00004204	WBGene00020952	WBGene00008179	WBGene00007543	WBGene00011063	WBGene00022188	WBGene00022835	WBGene00014158	WBGene00003562	WBGene00004192	WBGene00015525	WBGene00004509
WBGene00012360	WBGene00012360	WBGene00012360	WBGene00001247	WBGene00000465	WBGene00015083	WBGene00000903	WBGene00022938	WBGene00013647	WBGene00018419	WBGene00015460	WBGene00017554	WBGene00007255	WBGene00004086	WBGene00013567	WBGene00014224	WBGene00004510
WBGene00021555	WBGene00021555	WBGene00021555	WBGene00001329	WBGene00000473	WBGene00000465	WBGene00012967	WBGene00022953	WBGene00009398	WBGene00017112	WBGene00023450	WBGene00235291	WBGene00010546	WBGene00013687	WBGene00010836	WBGene00014083	WBGene00004914
WBGene00008503	WBGene00008503	WBGene00008503	WBGene00001335	WBGene00000479	WBGene00007709	WBGene00021387	WBGene00014267	WBGene00044338	WBGene00013728	WBGene00003451	WBGene00194649	WBGene00022586	WBGene00002186	WBGene00018735	WBGene00013958	WBGene00004916
WBGene00011638	WBGene00011638	WBGene00011638	WBGene00001459	WBGene00000480	WBGene00003989	WBGene00022307	WBGene00022928	WBGene00016403	WBGene00010091	WBGene00012885	WBGene00007697	WBGene00013682	WBGene00001324	WBGene00001757	WBGene00013892	WBGene00004919
WBGene00000257	WBGene00000257	WBGene00000257	WBGene00001468	WBGene00000482	WBGene00021853	WBGene00021461	WBGene00022949	WBGene00016058	WBGene00004965	WBGene00008576	WBGene00022457	WBGene00009513	WBGene00003231	WBGene00012293	WBGene00013324	WBGene00004984
WBGene00021676	WBGene00021676	WBGene00021676	WBGene00001480	WBGene00000503	WBGene00015461	WBGene00021941	WBGene00014272	WBGene00044235	WBGene00004808	WBGene00016341	WBGene00000387	WBGene00013303	WBGene00004978	WBGene00077761	WBGene00013204	WBGene00006423
WBGene00001832	WBGene00001832	WBGene00001832	WBGene00001496	WBGene00000512	WBGene00008533	WBGene00010067	WBGene00022894	WBGene00021786	WBGene00009004	WBGene00008528	WBGene00016581	WBGene00007580	WBGene00019831	WBGene00007488	WBGene00013143	WBGene00006449
WBGene00000275	WBGene00000275	WBGene00000275	WBGene00001520	WBGene00000523	WBGene00007501	WBGene00003638	WBGene00010733	WBGene00017388	WBGene00018045	WBGene00001424	WBGene00007237	WBGene00008349	WBGene00018721	WBGene00008944	WBGene00013129	WBGene00006888
WBGene00006817	WBGene00006817	WBGene00006817	WBGene00001523	WBGene00000566	WBGene00004312	WBGene00020832	WBGene00022912	WBGene00017209	WBGene00013237	WBGene00001242	WBGene00020931	WBGene00194912	WBGene00000867	WBGene00022501	WBGene00013004	WBGene00007577
WBGene00007966	WBGene00007966	WBGene00007966	WBGene00001569	WBGene00000591	WBGene00005022	WBGene00000514	WBGene00014318	WBGene00021085	WBGene00017386	WBGene00011859	WBGene00013800	WBGene00004985	WBGene00000913	WBGene00010269	WBGene00012992	WBGene00007624
WBGene00004187	WBGene00004187	WBGene00004187	WBGene00001583	WBGene00000792	WBGene00010557	WBGene00021308	WBGene00014340	WBGene00000744	WBGene00019084	WBGene00009454	WBGene00020909	WBGene00009277	WBGene00021652	WBGene00012141	WBGene00012978	WBGene00007975
WBGene00010281	WBGene00010281	WBGene00010281	WBGene00001606	WBGene00000797	WBGene00003228	WBGene00018804	WBGene00013918	WBGene00021083	WBGene00009987	WBGene00007792	WBGene00009271	WBGene00000564	WBGene00006934	WBGene00021751	WBGene00012964	WBGene00008400
WBGene00007788	WBGene00007788	WBGene00007788	WBGene00001638	WBGene00000803	WBGene00020696	WBGene00017106	WBGene00014287	WBGene00021084	WBGene00017384	WBGene00022005	WBGene00014116	WBGene00015187	WBGene00044689	WBGene00017717	WBGene00012950	WBGene00008995
WBGene00006994	WBGene00006994	WBGene00006994	WBGene00001663	WBGene00000832	WBGene00011945	WBGene00044641	WBGene00014269	WBGene00044337	WBGene00004918	WBGene00018529	WBGene00021214	WBGene00019464	WBGene00001607	WBGene00008583	WBGene00012929	WBGene00009052
WBGene00004955	WBGene00004955	WBGene00004955	WBGene00001666	WBGene00000840	WBGene00009098	WBGene00002181	WBGene00014292	WBGene00009251	WBGene00006726	WBGene00017321	WBGene00012721	WBGene00044325	WBGene00002240	WBGene00007997	WBGene00012830	WBGene00010263
WBGene00003951	WBGene00003951	WBGene00003951	WBGene00001680	WBGene00000846	WBGene00003229	WBGene00000636	WBGene00014263	WBGene00015458	WBGene00012781	WBGene00044122	WBGene00013138	WBGene00009123	WBGene00002717	WBGene00007744	WBGene00012768	WBGene00010280
WBGene00012543	WBGene00012543	WBGene00012543	WBGene00001745	WBGene00000866	WBGene00007023	WBGene00008622	WBGene00022915	WBGene00017303	WBGene00019220	WBGene00011274	WBGene00013122	WBGene00020864	WBGene00004078	WBGene00002184	WBGene00012738	WBGene00010734
WBGene00021192	WBGene00021192	WBGene00021192	WBGene00001814	WBGene00000867	WBGene00022037	WBGene00016299	WBGene00014275	WBGene00010041	WBGene00022754	WBGene00015908	WBGene00011173	WBGene00004360	WBGene00007428	WBGene00000512	WBGene00012714	WBGene00011061
WBGene00012471	WBGene00012471	WBGene00012471	WBGene00001955	WBGene00000868	WBGene00004984	WBGene00206377	WBGene00006333	WBGene00020237	WBGene00021026	WBGene00009735	WBGene00009138	WBGene00044650	WBGene00000419	WBGene00016427	WBGene00012692	WBGene00011333
WBGene00001688	WBGene00001688	WBGene00001688	WBGene00002004	WBGene00000870	WBGene00006528	WBGene00011733	WBGene00022978	WBGene00003771	WBGene00004920	WBGene00007825	WBGene00001590	WBGene00008648	WBGene00009203	WBGene00007131	WBGene00012676	WBGene00011580
WBGene00003992	WBGene00003992	WBGene00003992	WBGene00002028	WBGene00000871	WBGene00004391	WBGene00000463	WBGene00022945	WBGene00044339	WBGene00003587	WBGene00020940	WBGene00008258	WBGene00005026	WBGene00008274	WBGene00012763	WBGene00012652	WBGene00011910
WBGene00019883	WBGene00019883	WBGene00019883	WBGene00002042	WBGene00000884	WBGene00012550	WBGene00020797	WBGene00014333	WBGene00044357	WBGene00017735	WBGene00013296	WBGene00020443	WBGene00021820	WBGene00003230	WBGene00010965	WBGene00012556	WBGene00011945
WBGene00002994	WBGene00002994	WBGene00002994	WBGene00002048	WBGene00000894	WBGene00012879	WBGene00021417	WBGene00014342	WBGene00011313	WBGene00006044	WBGene00022268	WBGene00044438	WBGene00021634	WBGene00012879	WBGene00000829	WBGene00012478	WBGene00012167
WBGene00001689	WBGene00001689	WBGene00001689	WBGene00002088	WBGene00000897	WBGene00011350	WBGene00013429	WBGene00022925	WBGene00007537	WBGene00015941	WBGene00015997	WBGene00021386	WBGene00012010	WBGene00021685	WBGene00010962	WBGene00012465	WBGene00012484
WBGene00000115	WBGene00000115	WBGene00000115	WBGene00002100	WBGene00000898	WBGene00009563	WBGene00012124	WBGene00014283	WBGene00007356	WBGene00018762	WBGene00014170	WBGene00011344	WBGene00007978	WBGene00004984	WBGene00010964	WBGene00012244	WBGene00014115
WBGene00006974	WBGene00006974	WBGene00006974	WBGene00002147	WBGene00000899	WBGene00004242	WBGene00015020	WBGene00022989	WBGene00044174	WBGene00184990	WBGene00013299	WBGene00013000	WBGene00043051	WBGene00004254		WBGene00012059	WBGene00014208
WBGene00018898	WBGene00018898	WBGene00018898	WBGene00002176	WBGene00000900	WBGene00003230	WBGene00022353	WBGene00022939	WBGene00019870	WBGene00021486	WBGene00019630	WBGene00013175	WBGene00011242	WBGene00001653		WBGene00011944	WBGene00015943
WBGene00001214	WBGene00001214	WBGene00001214	WBGene00002181	WBGene00000901	WBGene00008173	WBGene00009148	WBGene00022976	WBGene00009090	WBGene00013150	WBGene00015205	WBGene00022795	WBGene00020375	WBGene00011835		WBGene00011759	WBGene00017620
WBGene00017920	WBGene00017920	WBGene00017920	WBGene00002184	WBGene00000913	WBGene00004078	WBGene00023451	WBGene00022992	WBGene00015392	WBGene00022046	WBGene00003442	WBGene00019274	WBGene00000019	WBGene00011945		WBGene00011334	WBGene00017641
WBGene00003796	WBGene00003796	WBGene00003796	WBGene00002189	WBGene00000914	WBGene00004702	WBGene00006985	WBGene00022972	WBGene00004173	WBGene00007617	WBGene00018218	WBGene00006624	WBGene00001393	WBGene00018483		WBGene00010905	WBGene00018921
WBGene00017981	WBGene00017981	WBGene00017981	WBGene00002203	WBGene00000929	WBGene00000145	WBGene00018577	WBGene00022965	WBGene00023477	WBGene00022214	WBGene00022864	WBGene00012696	WBGene00006732	WBGene00018316		WBGene00010896	WBGene00019629
WBGene00044789	WBGene00044789	WBGene00044789	WBGene00002220	WBGene00000980	WBGene00000388	WBGene00021913	WBGene00006316	WBGene00011266	WBGene00022884	WBGene00012931	WBGene00021153	WBGene00014004	WBGene00003186		WBGene00010771	WBGene00019971
WBGene00008399	WBGene00008399	WBGene00008399	WBGene00002222	WBGene00000990	WBGene00000530	WBGene00016485	WBGene00014320	WBGene00021904	WBGene00022875	WBGene00009051	WBGene00019651	WBGene00016159	WBGene00000496		WBGene00010732	WBGene00020707
WBGene00018900	WBGene00018900	WBGene00018900	WBGene00002230	WBGene00000993	WBGene00000797	WBGene00018309	WBGene00022959	WBGene00002259	WBGene00020285	WBGene00017459	WBGene00022681	WBGene00001606	WBGene00008682		WBGene00010627	WBGene00021419
WBGene00003210	WBGene00003210	WBGene00003210	WBGene00002248	WBGene00000995	WBGene00000866	WBGene00022177	WBGene00014323	WBGene00000758	WBGene00000620	WBGene00007570	WBGene00010000	WBGene00000163	WBGene00002144		WBGene00010624	WBGene00021929
WBGene00006536	WBGene00006536	WBGene00006536	WBGene00002264	WBGene00001006	WBGene00000867	WBGene00020930	WBGene00013993	WBGene00012799	WBGene00015165	WBGene00010879	WBGene00044003	WBGene00010542	WBGene00013021		WBGene00010560	WBGene00022034
WBGene00003133	WBGene00003133	WBGene00003133	WBGene00002977	WBGene00001025	WBGene00000879	WBGene00013603	WBGene00014324	WBGene00001756	WBGene00000688	WBGene00018068	WBGene00015189	WBGene00017996	WBGene00019807		WBGene00010556	WBGene00022877
WBGene00022739	WBGene00022739	WBGene00022739	WBGene00002990	WBGene00001032	WBGene00000913	WBGene00021469	WBGene00014295	WBGene00012382	WBGene00050893	WBGene00007216	WBGene00017121	WBGene00022212	WBGene00000366		WBGene00010478
WBGene00003792	WBGene00003792	WBGene00003792	WBGene00003021	WBGene00001041	WBGene00001051	WBGene00015775	WBGene00011346	WBGene00022156	WBGene00012180	WBGene00013194	WBGene00020066	WBGene00013734	WBGene00003184		WBGene00010405
WBGene00012999	WBGene00012999	WBGene00012999	WBGene00003038	WBGene00001060	WBGene00001095	WBGene00017453	WBGene00010430	WBGene00044272	WBGene00044275	WBGene00008772	WBGene00008660	WBGene00022534	WBGene00007709		WBGene00010096
WBGene00013270	WBGene00013270	WBGene00013270	WBGene00003043	WBGene00001061	WBGene00001606	WBGene00022131	WBGene00022908	WBGene00016180	WBGene00003430	WBGene00016511	WBGene00000007	WBGene00003898	WBGene00000465		WBGene00010094
WBGene00002368	WBGene00002368	WBGene00002368	WBGene00003045	WBGene00001072	WBGene00001607	WBGene00021458	WBGene00022933	WBGene00019090	WBGene00017485	WBGene00022023	WBGene00007045	WBGene00001645	WBGene00016117		WBGene00010044
WBGene00003214	WBGene00003214	WBGene00003214	WBGene00003075	WBGene00001077	WBGene00001647	WBGene00008500	WBGene00022901	WBGene00003767	WBGene00045209	WBGene00018997	WBGene00018980	WBGene00007710	WBGene00001023		WBGene00009993
WBGene00002231	WBGene00002231	WBGene00002231	WBGene00003087	WBGene00001078	WBGene00002072	WBGene00022608	WBGene00014282	WBGene00019021	WBGene00016845	WBGene00008724	WBGene00018143	WBGene00011352	WBGene00004946		WBGene00009711
WBGene00020652	WBGene00020652	WBGene00020652	WBGene00003124	WBGene00001081	WBGene00002136	WBGene00018773	WBGene00022909	WBGene00009637	WBGene00011103	WBGene00009369	WBGene00021855	WBGene00017548	WBGene00004241		WBGene00009305
WBGene00020035	WBGene00020035	WBGene00020035	WBGene00003142	WBGene00001082	WBGene00003026	WBGene00012717	WBGene00014298	WBGene00003765	WBGene00043187	WBGene00018332	WBGene00012789	WBGene00008219	WBGene00011320		WBGene00009246
WBGene00004782	WBGene00004782	WBGene00004782	WBGene00003182	WBGene00001086	WBGene00003065	WBGene00019316	WBGene00014268	WBGene00004118	WBGene00001905	WBGene00003581	WBGene00010459	WBGene00008120	WBGene00009661		WBGene00009211
WBGene00008005	WBGene00008005	WBGene00008005	WBGene00003185	WBGene00001089	WBGene00003161	WBGene00010610	WBGene00000310	WBGene00010196	WBGene00017488	WBGene00013657	WBGene00015690	WBGene00018923	WBGene00003918		WBGene00009189
WBGene00004459	WBGene00004459	WBGene00004459	WBGene00003373	WBGene00001101	WBGene00003231	WBGene00003593	WBGene00022897	WBGene00044644	WBGene00020599	WBGene00018071	WBGene00010681	WBGene00006466	WBGene00007027		WBGene00009132
WBGene00013591	WBGene00013591	WBGene00013591	WBGene00003387	WBGene00001102	WBGene00003395	WBGene00010726	WBGene00014305	WBGene00010491	WBGene00003462	WBGene00020105	WBGene00013212	WBGene00007573	WBGene00016178		WBGene00008920
WBGene00007615	WBGene00007615	WBGene00007615	WBGene00003402	WBGene00001130	WBGene00003784	WBGene00011049	WBGene00014304	WBGene00009640	WBGene00044274	WBGene00194642	WBGene00010460	WBGene00018785	WBGene00015102		WBGene00008769
WBGene00010056	WBGene00010056	WBGene00010056	WBGene00003410	WBGene00001145	WBGene00003865	WBGene00013672	WBGene00014313	WBGene00015623	WBGene00014042	WBGene00009938	WBGene00020942	WBGene00010141	WBGene00012341		WBGene00008670
WBGene00004042	WBGene00004042	WBGene00004042	WBGene00003480	WBGene00001148	WBGene00003870	WBGene00015200	WBGene00022943	WBGene00015457	WBGene00077764	WBGene00021960	WBGene00006608	WBGene00012121	WBGene00001016		WBGene00008480
WBGene00003504	WBGene00003504	WBGene00003504	WBGene00003509	WBGene00001161	WBGene00003912	WBGene00044705	WBGene00014279	WBGene00043147	WBGene00219383	WBGene00044341	WBGene00007863	WBGene00017801	WBGene00010259		WBGene00008456
WBGene00000872	WBGene00000872	WBGene00000872	WBGene00003517	WBGene00001162	WBGene00004027	WBGene00002100	WBGene00022931	WBGene00044316	WBGene00018669	WBGene00008122	WBGene00006546	WBGene00011576	WBGene00009065		WBGene00008455
WBGene00022257	WBGene00022257	WBGene00022257	WBGene00003523	WBGene00001178	WBGene00004351	WBGene00022063	WBGene00022975	WBGene00016153	WBGene00001912	WBGene00020480	WBGene00013713	WBGene00002783	WBGene00003060		WBGene00008452
WBGene00015143	WBGene00015143	WBGene00015143	WBGene00003552	WBGene00001179	WBGene00004392	WBGene00007119	WBGene00014315	WBGene00008359	WBGene00000621	WBGene00016414	WBGene00012735	WBGene00012385	WBGene00011980		WBGene00008428
WBGene00007028	WBGene00007028	WBGene00007028	WBGene00003582	WBGene00001186	WBGene00004436	WBGene00013352	WBGene00022984	WBGene00015010	WBGene00007544	WBGene00021114	WBGene00044423	WBGene00012466	WBGene00009285		WBGene00008151
WBGene00015504	WBGene00015504	WBGene00015504	WBGene00003585	WBGene00001193	WBGene00004443	WBGene00019194	WBGene00014286	WBGene00016594	WBGene00001943	WBGene00018370	WBGene00020974	WBGene00007167	WBGene00015677		WBGene00007859
WBGene00000508	WBGene00000508	WBGene00000508	WBGene00003593	WBGene00001224	WBGene00004470	WBGene00004148	WBGene00013010	WBGene00006052	WBGene00044175	WBGene00001039	WBGene00018797	WBGene00020208	WBGene00011604		WBGene00007731
WBGene00001830	WBGene00001830	WBGene00001830	WBGene00003600	WBGene00001235	WBGene00005324	WBGene00016885	WBGene00014271	WBGene00044206	WBGene00045208	WBGene00021925	WBGene00019677	WBGene00020314	WBGene00016889		WBGene00007712
WBGene00004374	WBGene00004374	WBGene00004374	WBGene00003602	WBGene00001253	WBGene00006394	WBGene00008932	WBGene00006338	WBGene00020243	WBGene00044271	WBGene00003429	WBGene00020653	WBGene00010427	WBGene00009587		WBGene00007708
WBGene00007352	WBGene00007352	WBGene00007352	WBGene00003637	WBGene00001324	WBGene00006473	WBGene00017507	WBGene00022956	WBGene00010987	WBGene00012591	WBGene00003443	WBGene00019257	WBGene00017696	WBGene00010013		WBGene00007617
WBGene00012484	WBGene00012484	WBGene00012484	WBGene00003638	WBGene00001325	WBGene00006546	WBGene00021302	WBGene00012377	WBGene00003763	WBGene00012840	WBGene00001682	WBGene00044762	WBGene00011802	WBGene00006943		WBGene00007564
WBGene00001833	WBGene00001833	WBGene00001833	WBGene00003648	WBGene00001329	WBGene00006562	WBGene00012159	WBGene00014274	WBGene00016733	WBGene00044273	WBGene00009581	WBGene00022113	WBGene00018364	WBGene00004179		WBGene00007413
WBGene00011240	WBGene00011240	WBGene00011240	WBGene00003674	WBGene00001340	WBGene00006618	WBGene00021416	WBGene00014302	WBGene00007440	WBGene00044340	WBGene00016336	WBGene00018314	WBGene00009701	WBGene00018512		WBGene00007111
WBGene00003789	WBGene00003789	WBGene00003789	WBGene00003848	WBGene00001368	WBGene00006619	WBGene00019994	WBGene00014264	WBGene00009221	WBGene00008967	WBGene00009457	WBGene00017817	WBGene00009290	WBGene00006988		WBGene00007001
WBGene00001423	WBGene00001423	WBGene00001423	WBGene00003903	WBGene00001404	WBGene00007018	WBGene00002176	WBGene00010431	WBGene00001908	WBGene00003766	WBGene00008754	WBGene00022003	WBGene00008440	WBGene00007030		WBGene00007000
WBGene00004458	WBGene00004458	WBGene00004458	WBGene00003915	WBGene00001412	WBGene00007150	WBGene00002977	WBGene00022964	WBGene00017127	WBGene00021086	WBGene00021997	WBGene00010147	WBGene00020904	WBGene00002889		WBGene00006725
WBGene00001110	WBGene00001110	WBGene00001110	WBGene00003970	WBGene00001425	WBGene00007225	WBGene00013162	WBGene00022991	WBGene00003768	WBGene00017305	WBGene00006572	WBGene00007513	WBGene00015009	WBGene00019087		WBGene00006497
WBGene00020821	WBGene00020821	WBGene00020821	WBGene00003976	WBGene00001435	WBGene00007332	WBGene00044227	WBGene00022994	WBGene00015947	WBGene00012604	WBGene00013720	WBGene00019153	WBGene00013701	WBGene00004239		WBGene00006489
WBGene00008166	WBGene00008166	WBGene00008166	WBGene00004045	WBGene00001436	WBGene00007720	WBGene00002184	WBGene00014273	WBGene00018303	WBGene00007543	WBGene00021149	WBGene00022010	WBGene00006056	WBGene00009035		WBGene00004499
WBGene00001831	WBGene00001831	WBGene00001831	WBGene00004056	WBGene00001470	WBGene00007978	WBGene00043534	WBGene00014376	WBGene00000682	WBGene00013647	WBGene00012357	WBGene00010081	WBGene00010770	WBGene00010351		WBGene00004497
WBGene00003507	WBGene00003507	WBGene00003507	WBGene00004057	WBGene00001484	WBGene00008122	WBGene00019871	WBGene00023019	WBGene00007232	WBGene00009398	WBGene00012722	WBGene00013052	WBGene00001647	WBGene00000226		WBGene00004496
WBGene00009368	WBGene00009368	WBGene00009368	WBGene00004120	WBGene00001490	WBGene00008440	WBGene00018496	WBGene00023028	WBGene00008358	WBGene00044338	WBGene00022143	WBGene00022617	WBGene00020948	WBGene00011729		WBGene00004495
WBGene00001855	WBGene00001855	WBGene00001855	WBGene00004140	WBGene00001492	WBGene00008464	WBGene00021447	WBGene00023007	WBGene00164969	WBGene00016403	WBGene00012354	WBGene00015215	WBGene00008165	WBGene00004374		WBGene00004494
WBGene00011819	WBGene00011819	WBGene00011819	WBGene00004148	WBGene00001494	WBGene00008488	WBGene00044154	WBGene00023015	WBGene00019880	WBGene00016058	WBGene00003468	WBGene00007601	WBGene00010096	WBGene00007028		WBGene00004493
WBGene00015515	WBGene00015515	WBGene00015515	WBGene00004196	WBGene00001496	WBGene00008641	WBGene00007218	WBGene00023102	WBGene00007541	WBGene00044235	WBGene00021880	WBGene00018819	WBGene00007145	WBGene00022257		WBGene00004492
WBGene00000227	WBGene00000227	WBGene00000227	WBGene00004198	WBGene00001516	WBGene00008822	WBGene00001459	WBGene00023086	WBGene00003762	WBGene00021786	WBGene00017002	WBGene00021546	WBGene00018563	WBGene00013591		WBGene00004491
WBGene00003159	WBGene00003159	WBGene00003159	WBGene00004199	WBGene00001544	WBGene00008825	WBGene00018202	WBGene00014365	WBGene00002018	WBGene00017388	WBGene00000878	WBGene00008052	WBGene00021721	WBGene00020035		WBGene00004490
WBGene00003914	WBGene00003914	WBGene00003914	WBGene00004202	WBGene00001561	WBGene00009006	WBGene00013666	WBGene00014438	WBGene00001731	WBGene00017209	WBGene00012807	WBGene00008530	WBGene00019079	WBGene00020652		WBGene00004489
WBGene00011560	WBGene00011560	WBGene00011560	WBGene00004227	WBGene00001569	WBGene00009007	WBGene00021987	WBGene00023016	WBGene00194674	WBGene00021085	WBGene00009002	WBGene00007102	WBGene00016501	WBGene00002368		WBGene00004488
WBGene00003002	WBGene00003002	WBGene00003002	WBGene00004245	WBGene00001577	WBGene00009118	WBGene00000089	WBGene00014427	WBGene00013898	WBGene00000744	WBGene00022118	WBGene00022532	WBGene00001396	WBGene00044789		WBGene00004487
WBGene00013038	WBGene00013038	WBGene00013038	WBGene00004256	WBGene00001582	WBGene00009128	WBGene00017629	WBGene00014360	WBGene00044472	WBGene00021083	WBGene00021358	WBGene00012002	WBGene00013978	WBGene00012360		WBGene00004486
WBGene00003801	WBGene00003801	WBGene00003801	WBGene00004305	WBGene00001583	WBGene00009186	WBGene00021001	WBGene00014449	WBGene00044487	WBGene00021084	WBGene00012029	WBGene00015942	WBGene00011834	WBGene00010621		WBGene00004485
WBGene00006964	WBGene00006964	WBGene00006964	WBGene00004306	WBGene00001585	WBGene00009191	WBGene00012003	WBGene00023038	WBGene00016360	WBGene00044337	WBGene00044634	WBGene00019425	WBGene00007912	WBGene00013156		WBGene00004484
WBGene00006737	WBGene00006737	WBGene00006737	WBGene00004352	WBGene00001595	WBGene00009404	WBGene00013036	WBGene00023056	WBGene00009957	WBGene00009251	WBGene00008976	WBGene00000259	WBGene00005020	WBGene00002229		WBGene00004483
WBGene00016405	WBGene00016405	WBGene00016405	WBGene00004361	WBGene00001599	WBGene00009444	WBGene00013163	WBGene00014354		WBGene00015458	WBGene00011319	WBGene00010378	WBGene00005023	WBGene00002225		WBGene00004482
WBGene00000499	WBGene00000499	WBGene00000499	WBGene00004377	WBGene00001602	WBGene00009662	WBGene00004045	WBGene00014351		WBGene00017303	WBGene00012996	WBGene00014157	WBGene00015462	WBGene00002228		WBGene00004481
WBGene00004467	WBGene00004467	WBGene00004467	WBGene00004382	WBGene00001606	WBGene00010000	WBGene00017264	WBGene00014347		WBGene00010041	WBGene00021331	WBGene00009893	WBGene00003395	WBGene00002226		WBGene00004480
WBGene00007092	WBGene00007092	WBGene00007092	WBGene00004423	WBGene00001607	WBGene00010408	WBGene00220258	WBGene00023002		WBGene00020237	WBGene00003431	WBGene00016902	WBGene00022124	WBGene00015580		WBGene00004479
WBGene00009180	WBGene00009180	WBGene00009180	WBGene00004455	WBGene00001609	WBGene00010492		WBGene00014446		WBGene00003771	WBGene00017087	WBGene00021781	WBGene00014201	WBGene00018350		WBGene00004478
WBGene00020392	WBGene00020392	WBGene00020392	WBGene00004509	WBGene00001637	WBGene00010608		WBGene00022998		WBGene00044339	WBGene00021548	WBGene00007226	WBGene00012795	WBGene00017592		WBGene00004477
WBGene00002034	WBGene00002034	WBGene00002034	WBGene00004745	WBGene00001647	WBGene00010609		WBGene00014436		WBGene00044357	WBGene00004451	WBGene00003246	WBGene00018009	WBGene00019959		WBGene00004476
WBGene00003085	WBGene00003085	WBGene00003085	WBGene00004778	WBGene00001648	WBGene00010620		WBGene00014389		WBGene00011313	WBGene00013879	WBGene00016019	WBGene00013718	WBGene00013694		WBGene00004475
WBGene00021698	WBGene00021698	WBGene00021698	WBGene00004795	WBGene00001653	WBGene00010778		WBGene00014385		WBGene00007537	WBGene00010055	WBGene00010846	WBGene00011318	WBGene00013639		WBGene00004474
WBGene00000772	WBGene00000772	WBGene00000772	WBGene00004827	WBGene00001666	WBGene00010942		WBGene00023031		WBGene00007356	WBGene00013020	WBGene00020978	WBGene00012353	WBGene00022200		WBGene00004473
WBGene00002008	WBGene00002008	WBGene00002008	WBGene00004887	WBGene00001679	WBGene00011062		WBGene00023095		WBGene00044174	WBGene00044131	WBGene00044358	WBGene00018848	WBGene00018335		WBGene00004472
WBGene00020284	WBGene00020284	WBGene00020284	WBGene00004889	WBGene00001683	WBGene00011063		WBGene00023073		WBGene00019870	WBGene00019626	WBGene00008556	WBGene00003478	WBGene00018862		WBGene00004471
WBGene00007009	WBGene00007009	WBGene00007009	WBGene00004905	WBGene00001708	WBGene00011489		WBGene00014426		WBGene00009090	WBGene00013449	WBGene00007979	WBGene00003870	WBGene00006830		WBGene00004470
WBGene00018781	WBGene00018781	WBGene00018781	WBGene00004933	WBGene00001709	WBGene00011490		WBGene00023058		WBGene00015392	WBGene00022760	WBGene00021998	WBGene00004163	WBGene00011384		WBGene00004469
WBGene00003994	WBGene00003994	WBGene00003994	WBGene00005061	WBGene00001755	WBGene00011509		WBGene00023043		WBGene00004173	WBGene00008994	WBGene00013053	WBGene00015745	WBGene00010374		WBGene00004456
WBGene00001840	WBGene00001840	WBGene00001840	WBGene00005147	WBGene00001764	WBGene00011559		WBGene00023109		WBGene00023477	WBGene00016754	WBGene00010082	WBGene00012734	WBGene00011441		WBGene00004453
WBGene00001402	WBGene00001402	WBGene00001402	WBGene00005191	WBGene00001793	WBGene00011689		WBGene00023005		WBGene00011266	WBGene00009940	WBGene00000269	WBGene00019254	WBGene00001493		WBGene00004452
WBGene00016250	WBGene00016250	WBGene00016250	WBGene00006130	WBGene00001811	WBGene00011691		WBGene00014440		WBGene00021904	WBGene00020064	WBGene00012927	WBGene00019971	WBGene00004438		WBGene00004450
WBGene00021470	WBGene00021470	WBGene00021470	WBGene00006351	WBGene00001815	WBGene00011761		WBGene00023014		WBGene00002259	WBGene00009118	WBGene00017742	WBGene00007332	WBGene00006815		WBGene00004449
WBGene00022203	WBGene00022203	WBGene00022203	WBGene00006353	WBGene00001817	WBGene00011976		WBGene00023107		WBGene00000758	WBGene00001975	WBGene00009673	WBGene00015553	WBGene00002003		WBGene00004448
WBGene00018967	WBGene00018967	WBGene00018967	WBGene00006384	WBGene00001824	WBGene00011986		WBGene00023052		WBGene00012799	WBGene00003448	WBGene00022836	WBGene00020933	WBGene00013353		WBGene00004447
WBGene00003421	WBGene00003421	WBGene00003421	WBGene00006394	WBGene00001834	WBGene00012020		WBGene00023082		WBGene00001756	WBGene00004971	WBGene00011088	WBGene00016169	WBGene00010923		WBGene00004446
WBGene00002074	WBGene00002074	WBGene00002074	WBGene00006415	WBGene00001837	WBGene00012104		WBGene00023009		WBGene00012382	WBGene00019431	WBGene00007756	WBGene00001239	WBGene00021103		WBGene00004445
WBGene00015557	WBGene00015557	WBGene00015557	WBGene00006432	WBGene00001844	WBGene00012210		WBGene00014442		WBGene00022156	WBGene00015731	WBGene00013513	WBGene00017992	WBGene00004751		WBGene00004444
WBGene00004167	WBGene00004167	WBGene00004167	WBGene00006494	WBGene00001851	WBGene00012326		WBGene00023018		WBGene00044272	WBGene00016808	WBGene00008346	WBGene00020264	WBGene00000219		WBGene00004443
WBGene00003052	WBGene00003052	WBGene00003052	WBGene00006508	WBGene00001906	WBGene00012483		WBGene00014378		WBGene00016180	WBGene00000248	WBGene00020716	WBGene00011348	WBGene00004049		WBGene00004441
WBGene00012897	WBGene00012897	WBGene00012897	WBGene00006513	WBGene00001941	WBGene00012672		WBGene00014358		WBGene00019090	WBGene00009049	WBGene00020381	WBGene00010498	WBGene00006752		WBGene00004440
WBGene00009507	WBGene00009507	WBGene00009507	WBGene00006527	WBGene00001949	WBGene00012716		WBGene00023074		WBGene00003767	WBGene00006053	WBGene00015327	WBGene00014117	WBGene00013131		WBGene00004439
WBGene00003222	WBGene00003222	WBGene00003222	WBGene00006570	WBGene00001950	WBGene00012927		WBGene00014408		WBGene00019021	WBGene00013723	WBGene00017213	WBGene00004110	WBGene00006369		WBGene00004438
WBGene00006840	WBGene00006840	WBGene00006840	WBGene00006592	WBGene00001974	WBGene00013252		WBGene00014387		WBGene00009637	WBGene00018528	WBGene00019724	WBGene00020970	WBGene00018101		WBGene00004437
WBGene00009922	WBGene00009922	WBGene00009922	WBGene00006594	WBGene00001978	WBGene00013383		WBGene00023060		WBGene00003765	WBGene00011919	WBGene00000117	WBGene00019833	WBGene00019462		WBGene00004436
WBGene00010061	WBGene00010061	WBGene00010061	WBGene00006606	WBGene00001979	WBGene00013552		WBGene00023050		WBGene00004118	WBGene00015051	WBGene00008147	WBGene00008019	WBGene00002192		WBGene00004435
WBGene00017031	WBGene00017031	WBGene00017031	WBGene00006640	WBGene00001980	WBGene00013862		WBGene00014362		WBGene00010196	WBGene00003463	WBGene00019504	WBGene00000168	WBGene00010134		WBGene00004434
WBGene00011729	WBGene00011729	WBGene00011729	WBGene00006750	WBGene00001995	WBGene00014117		WBGene00022999		WBGene00044644	WBGene00020356	WBGene00015350	WBGene00017886	WBGene00015389		WBGene00004433
WBGene00003389	WBGene00003389	WBGene00003389	WBGene00006771	WBGene00002003	WBGene00014158		WBGene00014410		WBGene00010491	WBGene00013807	WBGene00021640	WBGene00009594	WBGene00017332		WBGene00004432
WBGene00001093	WBGene00001093	WBGene00001093	WBGene00006784	WBGene00002004	WBGene00015312		WBGene00014416		WBGene00009640	WBGene00022170	WBGene00006770	WBGene00013465	WBGene00010910		WBGene00004431
WBGene00012845	WBGene00012845	WBGene00012845	WBGene00006801	WBGene00002013	WBGene00015903		WBGene00014429		WBGene00015623	WBGene00020866	WBGene00015191	WBGene00009245	WBGene00012911		WBGene00004430
WBGene00016277	WBGene00016277	WBGene00016277	WBGene00006830	WBGene00002028	WBGene00015971		WBGene00023061		WBGene00015457	WBGene00044529	WBGene00014103	WBGene00003044	WBGene00003919		WBGene00004429
WBGene00006307	WBGene00006307	WBGene00006307	WBGene00006902	WBGene00002029	WBGene00015974		WBGene00014419		WBGene00043147	WBGene00000887	WBGene00021382	WBGene00003221	WBGene00007614		WBGene00004428
WBGene00008145	WBGene00008145	WBGene00008145	WBGene00006922	WBGene00002031	WBGene00016387		WBGene00023075		WBGene00044316	WBGene00007223	WBGene00009665	WBGene00001499	WBGene00019598		WBGene00004427
WBGene00021697	WBGene00021697	WBGene00021697	WBGene00006945	WBGene00002035	WBGene00016393		WBGene00014348		WBGene00016153	WBGene00013684	WBGene00010323	WBGene00017284	WBGene00018193		WBGene00004426
WBGene00006888	WBGene00006888	WBGene00006888	WBGene00006962	WBGene00002037	WBGene00016501		WBGene00023000		WBGene00008359	WBGene00003435	WBGene00007117	WBGene00010815	WBGene00004855		WBGene00004425
WBGene00015098	WBGene00015098	WBGene00015098	WBGene00006975	WBGene00002047	WBGene00016652		WBGene00023026		WBGene00015010	WBGene00003434	WBGene00012977	WBGene00045484	WBGene00017597		WBGene00004424
WBGene00009542	WBGene00009542	WBGene00009542	WBGene00006985	WBGene00002060	WBGene00016944		WBGene00023115		WBGene00016594	WBGene00020084	WBGene00018511	WBGene00021561	WBGene00013803		WBGene00004422
WBGene00001748	WBGene00001748	WBGene00001748	WBGene00007015	WBGene00002062	WBGene00017134		WBGene00014359		WBGene00006052	WBGene00022357	WBGene00015287	WBGene00015146	WBGene00020504		WBGene00004421
WBGene00017951	WBGene00017951	WBGene00017951	WBGene00007025	WBGene00002073	WBGene00017177		WBGene00023088		WBGene00044206	WBGene00003467	WBGene00003499	WBGene00017352	WBGene00002295		WBGene00004420
WBGene00012148	WBGene00012148	WBGene00012148	WBGene00007047	WBGene00002076	WBGene00017263		WBGene00023063		WBGene00020243	WBGene00022075	WBGene00012307	WBGene00012347	WBGene00021852		WBGene00004419
WBGene00000915	WBGene00000915	WBGene00000915	WBGene00007075	WBGene00002079	WBGene00017548		WBGene00014343		WBGene00010987	WBGene00016054	WBGene00016905	WBGene00020320	WBGene00006915		WBGene00004418
WBGene00006727	WBGene00006727	WBGene00006727	WBGene00007076	WBGene00002124	WBGene00017985		WBGene00023090		WBGene00003763	WBGene00017750	WBGene00009556	WBGene00020442	WBGene00022181		WBGene00004417
WBGene00002694	WBGene00002694	WBGene00002694	WBGene00007079	WBGene00002125	WBGene00017986		WBGene00023085		WBGene00016733	WBGene00009294	WBGene00004909	WBGene00013034	WBGene00003068		WBGene00004416
WBGene00006647	WBGene00006647	WBGene00006647	WBGene00007099	WBGene00002129	WBGene00017997		WBGene00023081		WBGene00007440	WBGene00002256	WBGene00005025	WBGene00021535	WBGene00020964		WBGene00004415
WBGene00010279	WBGene00010279	WBGene00010279	WBGene00007114	WBGene00002133	WBGene00018370		WBGene00023004		WBGene00009221	WBGene00004807	WBGene00001815	WBGene00016020	WBGene00249815		WBGene00004414
WBGene00016317	WBGene00016317	WBGene00016317	WBGene00007119	WBGene00002144	WBGene00018408		WBGene00023022		WBGene00001908	WBGene00018360	WBGene00000420	WBGene00012733	WBGene00004423		WBGene00004410
WBGene00006497	WBGene00006497	WBGene00006497	WBGene00007124	WBGene00002148	WBGene00018808		WBGene00023097		WBGene00017127	WBGene00013854	WBGene00013365	WBGene00011276	WBGene00012220		WBGene00004409
WBGene00019013	WBGene00019013	WBGene00019013	WBGene00007125	WBGene00002181	WBGene00018830		WBGene00023055		WBGene00003768	WBGene00012666	WBGene00020580	WBGene00007915	WBGene00000908		WBGene00004315
WBGene00002025	WBGene00002025	WBGene00002025	WBGene00007129	WBGene00002192	WBGene00018960		WBGene00023034		WBGene00015947	WBGene00003425	WBGene00022447	WBGene00012716	WBGene00016788		WBGene00004185
WBGene00022286	WBGene00022286	WBGene00022286	WBGene00007133	WBGene00002207	WBGene00019153		WBGene00009527		WBGene00018303	WBGene00003450	WBGene00008379	WBGene00006386	WBGene00021238		WBGene00004090
WBGene00019877	WBGene00019877	WBGene00019877	WBGene00007136	WBGene00002213	WBGene00019341		WBGene00008135		WBGene00000682	WBGene00008529	WBGene00010883	WBGene00006868	WBGene00003730		WBGene00003559
WBGene00011146	WBGene00011146	WBGene00011146	WBGene00007139	WBGene00002220	WBGene00019606		WBGene00014147		WBGene00007232	WBGene00013463	WBGene00017165	WBGene00000421	WBGene00022389		WBGene00003119
WBGene00016015	WBGene00016015	WBGene00016015	WBGene00007176	WBGene00002221	WBGene00019628		WBGene00022934		WBGene00008358	WBGene00045355	WBGene00013526	WBGene00009115	WBGene00009201		WBGene00003063
WBGene00021667	WBGene00021667	WBGene00021667	WBGene00007179	WBGene00002225	WBGene00019811		WBGene00022954		WBGene00164969	WBGene00018431	WBGene00010565	WBGene00015237	WBGene00000214		WBGene00003062
WBGene00019608	WBGene00019608	WBGene00019608	WBGene00007215	WBGene00002226	WBGene00019947		WBGene00014297		WBGene00019880	WBGene00003458	WBGene00007499	WBGene00019628	WBGene00011436		WBGene00002083
WBGene00002850	WBGene00002850	WBGene00002850	WBGene00007218	WBGene00002228	WBGene00019989		WBGene00014299		WBGene00007541	WBGene00044894	WBGene00012647	WBGene00015130	WBGene00006576		WBGene00002078
WBGene00022048	WBGene00022048	WBGene00022048	WBGene00007242	WBGene00002232	WBGene00020290		WBGene00000311		WBGene00003762	WBGene00010719	WBGene00017851	WBGene00016311	WBGene00009204		WBGene00002066
WBGene00001526	WBGene00001526	WBGene00001526	WBGene00007275	WBGene00002245	WBGene00020404		WBGene00014321		WBGene00002018	WBGene00009125	WBGene00001246	WBGene00016792	WBGene00013119		WBGene00002065
WBGene00000226	WBGene00000226	WBGene00000226	WBGene00007331	WBGene00002247	WBGene00020858		WBGene00022952		WBGene00001731	WBGene00000165	WBGene00012925	WBGene00010840	WBGene00006594		WBGene00002064
WBGene00017774	WBGene00017774	WBGene00017774	WBGene00007395	WBGene00002261	WBGene00021035		WBGene00022985		WBGene00194674	WBGene00014222	WBGene00015162	WBGene00001038	WBGene00001663		WBGene00002062
WBGene00010280	WBGene00010280	WBGene00010280	WBGene00007405	WBGene00002275	WBGene00021056		WBGene00022967		WBGene00013898	WBGene00007190	WBGene00044447	WBGene00020259	WBGene00001177		WBGene00002061
WBGene00007048	WBGene00007048	WBGene00007048	WBGene00007429	WBGene00002295	WBGene00021730		WBGene00022923		WBGene00044472	WBGene00001155	WBGene00021763	WBGene00002072	WBGene00016163		WBGene00002060
WBGene00010037	WBGene00010037	WBGene00010037	WBGene00007454	WBGene00002368	WBGene00021736		WBGene00022997		WBGene00044487	WBGene00044758	WBGene00021552	WBGene00004147	WBGene00012866		WBGene00002059
WBGene00003676	WBGene00003676	WBGene00003676	WBGene00007485	WBGene00002632	WBGene00021757		WBGene00022980		WBGene00016360	WBGene00013017	WBGene00019561	WBGene00001565	WBGene00018572		WBGene00001423
WBGene00010351	WBGene00010351	WBGene00010351	WBGene00007487	WBGene00002889	WBGene00021763		WBGene00006327		WBGene00009957	WBGene00003466	WBGene00014228	WBGene00022452	WBGene00022435		WBGene00001234
WBGene00008035	WBGene00008035	WBGene00008035	WBGene00007545	WBGene00002980	WBGene00021813		WBGene00022948		WBGene00007855	WBGene00044633	WBGene00016946	WBGene00011625	WBGene00001955		WBGene00001233
WBGene00018285	WBGene00018285	WBGene00018285	WBGene00007600	WBGene00002982	WBGene00021924		WBGene00012752		WBGene00194692	WBGene00007443	WBGene00016353	WBGene00010712	WBGene00003687		WBGene00001232
WBGene00021097	WBGene00021097	WBGene00021097	WBGene00007606	WBGene00002985	WBGene00022043		WBGene00022995		WBGene00009091	WBGene00021959	WBGene00012998	WBGene00007914	WBGene00008665		WBGene00001231
WBGene00013189	WBGene00013189	WBGene00013189	WBGene00007609	WBGene00002991	WBGene00022117		WBGene00011470		WBGene00001903	WBGene00044205	WBGene00022620	WBGene00009404	WBGene00006062		WBGene00001230
WBGene00021313	WBGene00021313	WBGene00021313	WBGene00007626	WBGene00002992	WBGene00022127		WBGene00022899		WBGene00012123	WBGene00009501	WBGene00017078	WBGene00021056	WBGene00010658		WBGene00001229
WBGene00022034	WBGene00022034	WBGene00022034	WBGene00007647	WBGene00002994	WBGene00022273		WBGene00014334		WBGene00006589	WBGene00005012	WBGene00010408	WBGene00018908	WBGene00003170		WBGene00001228
WBGene00009035	WBGene00009035	WBGene00009035	WBGene00007667	WBGene00002997	WBGene00022586		WBGene00014332		WBGene00004156	WBGene00008414	WBGene00012326	WBGene00016421	WBGene00019197		WBGene00001227
WBGene00007258	WBGene00007258	WBGene00007258	WBGene00007679	WBGene00002999	WBGene00022669		WBGene00004708		WBGene00000016	WBGene00012459	WBGene00007201	WBGene00001538	WBGene00022138		WBGene00001226
WBGene00012715	WBGene00012715	WBGene00012715	WBGene00007705	WBGene00003006	WBGene00022704		WBGene00022902		WBGene00008357	WBGene00003081	WBGene00004885	WBGene00022888	WBGene00018130		WBGene00001225
WBGene00004043	WBGene00004043	WBGene00004043	WBGene00007750	WBGene00003010	WBGene00022836		WBGene00010376		WBGene00001735	WBGene00021401	WBGene00008288	WBGene00020553	WBGene00016029		WBGene00001209
WBGene00009460	WBGene00009460	WBGene00009460	WBGene00007771	WBGene00003011	WBGene00022881		WBGene00014301		WBGene00003764	WBGene00021312	WBGene00016157	WBGene00020761	WBGene00008298		WBGene00001167
WBGene00009284	WBGene00009284	WBGene00009284	WBGene00007779	WBGene00003022	WBGene00023427		WBGene00006314		WBGene00009384	WBGene00003444	WBGene00016987	WBGene00011044	WBGene00022413		WBGene00001166
WBGene00004775	WBGene00004775	WBGene00004775	WBGene00007920	WBGene00003024	WBGene00023450		WBGene00022929		WBGene00017667	WBGene00021427	WBGene00015697	WBGene00021539	WBGene00015635		WBGene00001001
WBGene00008921	WBGene00008921	WBGene00008921	WBGene00007924	WBGene00003026	WBGene00044345		WBGene00022914		WBGene00010633	WBGene00011743	WBGene00014086	WBGene00015641	WBGene00044258		WBGene00000933
WBGene00016971	WBGene00016971	WBGene00016971	WBGene00007926	WBGene00003030	WBGene00044431		WBGene00000308		WBGene00019194	WBGene00011247	WBGene00008137	WBGene00013668	WBGene00013225		WBGene00000772
WBGene00021014	WBGene00021014	WBGene00021014	WBGene00007928	WBGene00003036	WBGene00138720		WBGene00010276		WBGene00001904	WBGene00044026	WBGene00009039	WBGene00000866	WBGene00010619		WBGene00000480
WBGene00018612	WBGene00018612	WBGene00018612	WBGene00007941	WBGene00003037	WBGene00194906		WBGene00022981		WBGene00044389	WBGene00013987	WBGene00021847	WBGene00007720	WBGene00019731		WBGene00000276
WBGene00016444	WBGene00016444	WBGene00016444	WBGene00007976	WBGene00003040			WBGene00014126		WBGene00007246	WBGene00018120	WBGene00007711	WBGene00003864	WBGene00023489		WBGene00000079
WBGene00010232	WBGene00010232	WBGene00010232	WBGene00007982	WBGene00003043			WBGene00022947		WBGene00016627	WBGene00000877	WBGene00010913	WBGene00016381	WBGene00044250
WBGene00003904	WBGene00003904	WBGene00003904	WBGene00007985	WBGene00003046			WBGene00022969		WBGene00002016	WBGene00011401	WBGene00013425	WBGene00008140	WBGene00019779
WBGene00004239	WBGene00004239	WBGene00004239	WBGene00007988	WBGene00003048			WBGene00012292		WBGene00014245	WBGene00003446	WBGene00009178	WBGene00021035	WBGene00235274
WBGene00001401	WBGene00001401	WBGene00001401	WBGene00008086	WBGene00003053			WBGene00022966		WBGene00009097	WBGene00003426	WBGene00003479	WBGene00013742	WBGene00003003
WBGene00001599	WBGene00001599	WBGene00001599	WBGene00008111	WBGene00003056			WBGene00022927		WBGene00016658	WBGene00008768	WBGene00016964	WBGene00018509	WBGene00008434
WBGene00002637	WBGene00002637	WBGene00002637	WBGene00008133	WBGene00003076			WBGene00022913		WBGene00007869	WBGene00017919	WBGene00005024	WBGene00018902	WBGene00011746
WBGene00018866	WBGene00018866	WBGene00018866	WBGene00008178	WBGene00003084			WBGene00010777		WBGene00017390	WBGene00012739	WBGene00012120	WBGene00012020	WBGene00004361
WBGene00006565	WBGene00006565	WBGene00006565	WBGene00008196	WBGene00003086			WBGene00022996		WBGene00044724	WBGene00020905	WBGene00008364	WBGene00008339	WBGene00010731
WBGene00004343	WBGene00004343	WBGene00004343	WBGene00008226	WBGene00003107			WBGene00014330		WBGene00044016	WBGene00008459	WBGene00007390	WBGene00006946	WBGene00000225
WBGene00018341	WBGene00018341	WBGene00018341	WBGene00008243	WBGene00003111			WBGene00014319		WBGene00017506	WBGene00007239	WBGene00011144	WBGene00011143	WBGene00021391
WBGene00011507	WBGene00011507	WBGene00011507	WBGene00008270	WBGene00003149			WBGene00014314		WBGene00019501	WBGene00022155	WBGene00021425	WBGene00013011	WBGene00011913
WBGene00010260	WBGene00010260	WBGene00010260	WBGene00008317	WBGene00003150			WBGene00022906		WBGene00002255	WBGene00185006	WBGene00009978	WBGene00008546	WBGene00044045
WBGene00003798	WBGene00003798	WBGene00003798	WBGene00008353	WBGene00003151			WBGene00008104		WBGene00019332	WBGene00003432	WBGene00009182	WBGene00007637	WBGene00195246
WBGene00022399	WBGene00022399	WBGene00022399	WBGene00008398	WBGene00003154			WBGene00022961		WBGene00018729	WBGene00012166	WBGene00011731	WBGene00018678	WBGene00022211
WBGene00017797	WBGene00017797	WBGene00017797	WBGene00008426	WBGene00003155			WBGene00022941		WBGene00008310	WBGene00006433	WBGene00010075	WBGene00007980	WBGene00008579
WBGene00020915	WBGene00020915	WBGene00020915	WBGene00008444	WBGene00003156			WBGene00014270		WBGene00001907	WBGene00010679	WBGene00019726	WBGene00001056	WBGene00004856
WBGene00010582	WBGene00010582	WBGene00010582	WBGene00008500	WBGene00003157			WBGene00013948		WBGene00004987	WBGene00008541	WBGene00007269	WBGene00011489	WBGene00020859
WBGene00006699	WBGene00006699	WBGene00006699	WBGene00008517	WBGene00003158			WBGene00014328		WBGene00020025	WBGene00003449	WBGene00008281	WBGene00012369	WBGene00007275
WBGene00012936	WBGene00012936	WBGene00012936	WBGene00008527	WBGene00003159			WBGene00014296		WBGene00016659	WBGene00018119	WBGene00010839	WBGene00021200	WBGene00016825
WBGene00019087	WBGene00019087	WBGene00019087	WBGene00008568	WBGene00003164			WBGene00022950		WBGene00010763	WBGene00016623	WBGene00008766	WBGene00001574	WBGene00000652
WBGene00007433	WBGene00007433	WBGene00007433	WBGene00008582	WBGene00003172			WBGene00014327		WBGene00011286	WBGene00007330	WBGene00010418	WBGene00000254	WBGene00017741
WBGene00016440	WBGene00016440	WBGene00016440	WBGene00008620	WBGene00003183			WBGene00022900		WBGene00001767	WBGene00009705	WBGene00016621	WBGene00015807	WBGene00010813
WBGene00002889	WBGene00002889	WBGene00002889	WBGene00008622	WBGene00003184			WBGene00022903		WBGene00008040	WBGene00001033	WBGene00018131	WBGene00007698	WBGene00000140
WBGene00001860	WBGene00001860	WBGene00001860	WBGene00008648	WBGene00003185			WBGene00014341		WBGene00000034	WBGene00003452	WBGene00138720	WBGene00014098	WBGene00008901
WBGene00019766	WBGene00019766	WBGene00019766	WBGene00008665	WBGene00003209			WBGene00022935		WBGene00003769	WBGene00013030	WBGene00006805	WBGene00006562	WBGene00017921
WBGene00019323	WBGene00019323	WBGene00019323	WBGene00008681	WBGene00003219			WBGene00022955		WBGene00004174	WBGene00008765	WBGene00013934	WBGene00010036	WBGene00005529
WBGene00004980	WBGene00004980	WBGene00004980	WBGene00008690	WBGene00003228			WBGene00022977		WBGene00021627	WBGene00009736	WBGene00022748	WBGene00006483	WBGene00008997
WBGene00004508	WBGene00004508	WBGene00004508	WBGene00008695	WBGene00003229			WBGene00022937		WBGene00020886	WBGene00012926	WBGene00022102	WBGene00022393	WBGene00005528
WBGene00006736	WBGene00006736	WBGene00006736	WBGene00008750	WBGene00003230			WBGene00022960		WBGene00044182	WBGene00219275	WBGene00020095	WBGene00006804	WBGene00010768
WBGene00001431	WBGene00001431	WBGene00001431	WBGene00008776	WBGene00003231			WBGene00009555		WBGene00022653	WBGene00012830	WBGene00007043	WBGene00006443	WBGene00016354
WBGene00001209	WBGene00001209	WBGene00001209	WBGene00008782	WBGene00003238			WBGene00014284		WBGene00008360	WBGene00006503	WBGene00001937	WBGene00008686	WBGene00001394
WBGene00000874	WBGene00000874	WBGene00000874	WBGene00008802	WBGene00003239			WBGene00014443		WBGene00013884	WBGene00044924	WBGene00010615	WBGene00022580	WBGene00004192
WBGene00019510	WBGene00019510	WBGene00019510	WBGene00008819	WBGene00003246			WBGene00023093		WBGene00009895	WBGene00017360	WBGene00009956	WBGene00006406	WBGene00013567
WBGene00000875	WBGene00000875	WBGene00000875	WBGene00008821	WBGene00003253			WBGene00023047		WBGene00185097	WBGene00001486	WBGene00022056	WBGene00003562	WBGene00010836
WBGene00011338	WBGene00011338	WBGene00011338	WBGene00008823	WBGene00003254			WBGene00014388		WBGene00007251	WBGene00022650	WBGene00010366	WBGene00004086	WBGene00018735
WBGene00001085	WBGene00001085	WBGene00001085	WBGene00008882	WBGene00003368			WBGene00023040		WBGene00012383	WBGene00017289	WBGene00006059	WBGene00010354	WBGene00001757
WBGene00016140	WBGene00016140	WBGene00016140	WBGene00008890	WBGene00003373			WBGene00014424		WBGene00020049	WBGene00007597	WBGene00044614	WBGene00045357	WBGene00012293
WBGene00017088	WBGene00017088	WBGene00017088	WBGene00008913	WBGene00003378			WBGene00014400		WBGene00044746	WBGene00016011	WBGene00019459	WBGene00001648	WBGene00077761
WBGene00016173	WBGene00016173	WBGene00016173	WBGene00008929	WBGene00003384			WBGene00014437		WBGene00011949	WBGene00018895	WBGene00007301	WBGene00010080	WBGene00007488
WBGene00006383	WBGene00006383	WBGene00006383	WBGene00008932	WBGene00003394			WBGene00014409		WBGene00008392	WBGene00022621	WBGene00016843	WBGene00013687	WBGene00008944
WBGene00010787	WBGene00010787	WBGene00010787	WBGene00008937	WBGene00003395			WBGene00023032		WBGene00023493	WBGene00012608	WBGene00014230	WBGene00004752	WBGene00022501
WBGene00011282	WBGene00011282	WBGene00011282	WBGene00008945	WBGene00003396			WBGene00023103		WBGene00014039	WBGene00000235	WBGene00022818	WBGene00000101	WBGene00010269
WBGene00013689	WBGene00013689	WBGene00013689	WBGene00008949	WBGene00003397			WBGene00023079		WBGene00009639	WBGene00022448	WBGene00021795	WBGene00005019	WBGene00012141
WBGene00003034	WBGene00003034	WBGene00003034	WBGene00008973	WBGene00003410			WBGene00014413		WBGene00003879	WBGene00021227	WBGene00008854	WBGene00010284	WBGene00021751
WBGene00000889	WBGene00000889	WBGene00000889	WBGene00008975	WBGene00003411			WBGene00014396		WBGene00235293	WBGene00011063	WBGene00194703	WBGene00011511	WBGene00017717
WBGene00016202	WBGene00016202	WBGene00016202	WBGene00008986	WBGene00003413			WBGene00235251		WBGene00008356	WBGene00009367	WBGene00003010	WBGene00003026	WBGene00008583
WBGene00008781	WBGene00008781	WBGene00008781	WBGene00008996	WBGene00003476			WBGene00023070		WBGene00017498	WBGene00007714	WBGene00010915	WBGene00018974	WBGene00007997
WBGene00003777	WBGene00003777	WBGene00003777	WBGene00009009	WBGene00003477			WBGene00014386		WBGene00006585	WBGene00018419	WBGene00020350	WBGene00002186	WBGene00007744
WBGene00013143	WBGene00013143	WBGene00013143	WBGene00009044	WBGene00003478			WBGene00023059		WBGene00013078	WBGene00000263	WBGene00019127	WBGene00011304	WBGene00002184
WBGene00008400	WBGene00008400	WBGene00008400	WBGene00009142	WBGene00003479			WBGene00023024		WBGene00011019	WBGene00016161	WBGene00016735	WBGene00009441	WBGene00000512
WBGene00017075	WBGene00017075	WBGene00017075	WBGene00009148	WBGene00003509			WBGene00014363		WBGene00009634	WBGene00020802	WBGene00022702	WBGene00017372	WBGene00016427
WBGene00013168	WBGene00013168	WBGene00013168	WBGene00009161	WBGene00003510			WBGene00023001		WBGene00000701	WBGene00010922	WBGene00008272	WBGene00012934	WBGene00007131
WBGene00006571	WBGene00006571	WBGene00006571	WBGene00009191	WBGene00003518			WBGene00014379		WBGene00011753	WBGene00008664	WBGene00045247	WBGene00006349	WBGene00012763
WBGene00012474	WBGene00012474	WBGene00012474	WBGene00009204	WBGene00003568			WBGene00023089		WBGene00000700	WBGene00018745	WBGene00020841	WBGene00022880	WBGene00010965
WBGene00020695	WBGene00020695	WBGene00020695	WBGene00009221	WBGene00003582			WBGene00014445		WBGene00012118	WBGene00016387	WBGene00004308	WBGene00016409	WBGene00000829
WBGene00017988	WBGene00017988	WBGene00017988	WBGene00009224	WBGene00003598			WBGene00014373		WBGene00003752	WBGene00003372	WBGene00012115	WBGene00021756	WBGene00010962
WBGene00004504	WBGene00004504	WBGene00004504	WBGene00009233	WBGene00003599			WBGene00023105		WBGene00021979	WBGene00013473	WBGene00016890	WBGene00021924	WBGene00010964
WBGene00004465	WBGene00004465	WBGene00004465	WBGene00009247	WBGene00003601			WBGene00014417		WBGene00004810	WBGene00000975	WBGene00004496	WBGene00008136
WBGene00022785	WBGene00022785	WBGene00022785	WBGene00009280	WBGene00003603			WBGene00014377		WBGene00017541	WBGene00007337	WBGene00194906	WBGene00001324
WBGene00003799	WBGene00003799	WBGene00003799	WBGene00009288	WBGene00003609			WBGene00023051		WBGene00002015	WBGene00001154	WBGene00000001	WBGene00000090
WBGene00014176	WBGene00014176	WBGene00014176	WBGene00009323	WBGene00003611			WBGene00023035		WBGene00015756	WBGene00010574	WBGene00010992	WBGene00019842
WBGene00006405	WBGene00006405	WBGene00006405	WBGene00009354	WBGene00003616			WBGene00023010		WBGene00021918	WBGene00017112	WBGene00010889	WBGene00003231
WBGene00003559	WBGene00003559	WBGene00003559	WBGene00009361	WBGene00003619			WBGene00014384		WBGene00002020	WBGene00012809	WBGene00008141	WBGene00021474
WBGene00016947	WBGene00016947	WBGene00016947	WBGene00009380	WBGene00003621			WBGene00023023		WBGene00011906	WBGene00013728	WBGene00017025	WBGene00021316
WBGene00006440	WBGene00006440	WBGene00006440	WBGene00009442	WBGene00003626			WBGene00023098		WBGene00016420	WBGene00009739	WBGene00012401	WBGene00011030
WBGene00017300	WBGene00017300	WBGene00017300	WBGene00009453	WBGene00003627			WBGene00014399		WBGene00022582	WBGene00003584	WBGene00008488	WBGene00000537
WBGene00006734	WBGene00006734	WBGene00006734	WBGene00009468	WBGene00003630			WBGene00023049		WBGene00000370	WBGene00010091	WBGene00007732	WBGene00011503
WBGene00013924	WBGene00013924	WBGene00013924	WBGene00009552	WBGene00003636			WBGene00023096		WBGene00019489	WBGene00010246	WBGene00019667	WBGene00013681
WBGene00000592	WBGene00000592	WBGene00000592	WBGene00009558	WBGene00003639			WBGene00023101		WBGene00002017	WBGene00004965	WBGene00016966	WBGene00020022
WBGene00004132	WBGene00004132	WBGene00004132	WBGene00009576	WBGene00003650			WBGene00023100		WBGene00007250	WBGene00018961	WBGene00000520	WBGene00006916
WBGene00022114	WBGene00022114	WBGene00022114	WBGene00009602	WBGene00003655			WBGene00014390		WBGene00007874	WBGene00004808	WBGene00008725	WBGene00021689
WBGene00015816	WBGene00015816	WBGene00015816	WBGene00009630	WBGene00003656			WBGene00014353		WBGene00009964	WBGene00020286	WBGene00008185	WBGene00003196
WBGene00006997	WBGene00006997	WBGene00006997	WBGene00009657	WBGene00003660			WBGene00023077		WBGene00008304	WBGene00012766	WBGene00017812	WBGene00022750
WBGene00007030	WBGene00007030	WBGene00007030	WBGene00009659	WBGene00003661			WBGene00014380		WBGene00019226	WBGene00009959	WBGene00004489	WBGene00004978
WBGene00006499	WBGene00006499	WBGene00006499	WBGene00009696	WBGene00003668			WBGene00023042		WBGene00011733	WBGene00015185	WBGene00000375	WBGene00021444
WBGene00008385	WBGene00008385	WBGene00008385	WBGene00009713	WBGene00003674			WBGene00023017		WBGene00012152	WBGene00195178	WBGene00015422	WBGene00019831
WBGene00001979	WBGene00001979	WBGene00001979	WBGene00009769	WBGene00003690			WBGene00014420		WBGene00000675	WBGene00006601	WBGene00019196	WBGene00018319
WBGene00001259	WBGene00001259	WBGene00001259	WBGene00009788	WBGene00003692			WBGene00023099		WBGene00005000	WBGene00012210	WBGene00021632	WBGene00018721
WBGene00002077	WBGene00002077	WBGene00002077	WBGene00009793	WBGene00003712			WBGene00023080		WBGene00077691	WBGene00000764	WBGene00010549	WBGene00018948
WBGene00007762	WBGene00007762	WBGene00007762	WBGene00009801	WBGene00003723			WBGene00023054		WBGene00018400	WBGene00000777	WBGene00007780	WBGene00000867
WBGene00011867	WBGene00011867	WBGene00011867	WBGene00009812	WBGene00003728			WBGene00014345		WBGene00000029	WBGene00022865	WBGene00002208	WBGene00008172
WBGene00022738	WBGene00022738	WBGene00022738	WBGene00009866	WBGene00003733			WBGene00023113		WBGene00018298	WBGene00017114	WBGene00016752	WBGene00004063
WBGene00001049	WBGene00001049	WBGene00001049	WBGene00009917	WBGene00003783			WBGene00014428		WBGene00022708	WBGene00018132	WBGene00005013	WBGene00005077
WBGene00003793	WBGene00003793	WBGene00003793	WBGene00009919	WBGene00003784			WBGene00023087		WBGene00045271	WBGene00019406	WBGene00008918	WBGene00005006
WBGene00003795	WBGene00003795	WBGene00003795	WBGene00009988	WBGene00003795			WBGene00014423		WBGene00015043	WBGene00014111	WBGene00016675	WBGene00022589
WBGene00185089	WBGene00185089	WBGene00185089	WBGene00010003	WBGene00003830			WBGene00014361		WBGene00008557	WBGene00009004	WBGene00000200	WBGene00008684
WBGene00007588	WBGene00007588	WBGene00007588	WBGene00010011	WBGene00003864			WBGene00023045		WBGene00022497	WBGene00015273	WBGene00015558	WBGene00000913
WBGene00000863	WBGene00000863	WBGene00000863	WBGene00010051	WBGene00003865			WBGene00014356		WBGene00023416	WBGene00018045	WBGene00019834	WBGene00020274
WBGene00010583	WBGene00010583	WBGene00010583	WBGene00010066	WBGene00003868			WBGene00023122		WBGene00008063	WBGene00022394	WBGene00007094	WBGene00015765
WBGene00003508	WBGene00003508	WBGene00003508	WBGene00010067	WBGene00003882			WBGene00023203		WBGene00014030	WBGene00013237	WBGene00017026	WBGene00014015
WBGene00022854	WBGene00022854	WBGene00022854	WBGene00010071	WBGene00003887			WBGene00014590		WBGene00175027	WBGene00017542	WBGene00015744	WBGene00007797
WBGene00004755	WBGene00004755	WBGene00004755	WBGene00010184	WBGene00003912			WBGene00014524		WBGene00194738	WBGene00013310	WBGene00008431	WBGene00015513
WBGene00022244	WBGene00022244	WBGene00022244	WBGene00010197	WBGene00003918			WBGene00014478		WBGene00015876	WBGene00016449	WBGene00019769	WBGene00010641
WBGene00001284	WBGene00001284	WBGene00001284	WBGene00010199	WBGene00003921			WBGene00023166		WBGene00015805	WBGene00013605	WBGene00013232	WBGene00021443
WBGene00021595	WBGene00021595	WBGene00021595	WBGene00010212	WBGene00003930			WBGene00023130		WBGene00011774	WBGene00022470	WBGene00000389	WBGene00009456
WBGene00006988	WBGene00006988	WBGene00006988	WBGene00010242	WBGene00003936			WBGene00023202		WBGene00020014	WBGene00007308	WBGene00008641	WBGene00021652
WBGene00003160	WBGene00003160	WBGene00003160	WBGene00010262	WBGene00003954			WBGene00014487		WBGene00017019	WBGene00003836	WBGene00011299	WBGene00019334
WBGene00010912	WBGene00010912	WBGene00010912	WBGene00010364	WBGene00003955			WBGene00014620		WBGene00000617	WBGene00017386	WBGene00016742	WBGene00007622
WBGene00000274	WBGene00000274	WBGene00000274	WBGene00010365	WBGene00003965			WBGene00023211		WBGene00013392	WBGene00013302	WBGene00015992	WBGene00006934
WBGene00001226	WBGene00001226	WBGene00001226	WBGene00010433	WBGene00003970			WBGene00014603		WBGene00002019	WBGene00017999	WBGene00018399	WBGene00044689
WBGene00011959	WBGene00011959	WBGene00011959	WBGene00010434	WBGene00003976			WBGene00014502		WBGene00020670	WBGene00019084	WBGene00015688	WBGene00013545
WBGene00011722	WBGene00011722	WBGene00011722	WBGene00010453	WBGene00003979			WBGene00014627		WBGene00017621	WBGene00020181	WBGene00044448	WBGene00011807
WBGene00003785	WBGene00003785	WBGene00003785	WBGene00010483	WBGene00004027			WBGene00014525		WBGene00000017	WBGene00010155	WBGene00007969	WBGene00013196
WBGene00018512	WBGene00018512	WBGene00018512	WBGene00010484	WBGene00004032			WBGene00014573		WBGene00003080	WBGene00019838	WBGene00021636	WBGene00008218
WBGene00002005	WBGene00002005	WBGene00002005	WBGene00010491	WBGene00004034			WBGene00023221		WBGene00022415	WBGene00014032	WBGene00001839	WBGene00002212
WBGene00007617	WBGene00007617	WBGene00007617	WBGene00010550	WBGene00004050			WBGene00014572		WBGene00003860	WBGene00006463	WBGene00017763	WBGene00010687
WBGene00004179	WBGene00004179	WBGene00004179	WBGene00010581	WBGene00004055			WBGene00014546		WBGene00011285	WBGene00003078	WBGene00077453	WBGene00004117
WBGene00001030	WBGene00001030	WBGene00001030	WBGene00010585	WBGene00004060			WBGene00014499		WBGene00020017	WBGene00010450	WBGene00011606	WBGene00007586
WBGene00012524	WBGene00012524	WBGene00012524	WBGene00010610	WBGene00004077			WBGene00014561		WBGene00014006	WBGene00004930	WBGene00021736	WBGene00017328
WBGene00001874	WBGene00001874	WBGene00001874	WBGene00010625	WBGene00004078			WBGene00014592		WBGene00010790	WBGene00009980	WBGene00016445	WBGene00022296
WBGene00022603	WBGene00022603	WBGene00022603	WBGene00010690	WBGene00004089			WBGene00023174		WBGene00010956	WBGene00016055	WBGene00021771	WBGene00015312
WBGene00004738	WBGene00004738	WBGene00004738	WBGene00010692	WBGene00004106			WBGene00014531		WBGene00015268	WBGene00000970	WBGene00003012	WBGene00001607
WBGene00003794	WBGene00003794	WBGene00003794	WBGene00010699	WBGene00004110			WBGene00014508		WBGene00010319	WBGene00044305	WBGene00011761	WBGene00011994
WBGene00018892	WBGene00018892	WBGene00018892	WBGene00010704	WBGene00004121			WBGene00014482		WBGene00011536	WBGene00014249	WBGene00012208	WBGene00002240
WBGene00012730	WBGene00012730	WBGene00012730	WBGene00010726	WBGene00004126			WBGene00023156		WBGene00077773	WBGene00009187	WBGene00013893	WBGene00016632
WBGene00004355	WBGene00004355	WBGene00004355	WBGene00010731	WBGene00004134			WBGene00014519		WBGene00001875	WBGene00010094	WBGene00004962	WBGene00015310
WBGene00007463	WBGene00007463	WBGene00007463	WBGene00010734	WBGene00004140			WBGene00014529		WBGene00021625	WBGene00008457	WBGene00015026	WBGene00004028
WBGene00022598	WBGene00022598	WBGene00022598	WBGene00010735	WBGene00004148			WBGene00014583		WBGene00017726	WBGene00011045	WBGene00011897	WBGene00004064
WBGene00003156	WBGene00003156	WBGene00003156	WBGene00010756	WBGene00004163			WBGene00014617		WBGene00016731	WBGene00016954	WBGene00016278	WBGene00021363
WBGene00007110	WBGene00007110	WBGene00007110	WBGene00010780	WBGene00004181			WBGene00014539		WBGene00013079	WBGene00012637	WBGene00008034	WBGene00004975
WBGene00003367	WBGene00003367	WBGene00003367	WBGene00010783	WBGene00004206			WBGene00023148		WBGene00044921	WBGene00022876	WBGene00016586	WBGene00002717
WBGene00011061	WBGene00011061	WBGene00011061	WBGene00010811	WBGene00004208			WBGene00023152		WBGene00013867	WBGene00012859	WBGene00022172	WBGene00011988
WBGene00003063	WBGene00003063	WBGene00003063	WBGene00010868	WBGene00004209			WBGene00023210		WBGene00019886	WBGene00013442	WBGene00022456	WBGene00022882
WBGene00004698	WBGene00004698	WBGene00004698	WBGene00010934	WBGene00004210			WBGene00014560		WBGene00015907	WBGene00009987	WBGene00017304	WBGene00004078
WBGene00006943	WBGene00006943	WBGene00006943	WBGene00011029	WBGene00004212			WBGene00023171		WBGene00019152	WBGene00001808	WBGene00021286	WBGene00007428
WBGene00018625	WBGene00018625	WBGene00018625	WBGene00011049	WBGene00004215			WBGene00023140		WBGene00001048	WBGene00015855	WBGene00006491	WBGene00004767
WBGene00022774	WBGene00022774	WBGene00022774	WBGene00011066	WBGene00004217			WBGene00014605		WBGene00015046	WBGene00000879	WBGene00009191	WBGene00021914
WBGene00002845	WBGene00002845	WBGene00002845	WBGene00011067	WBGene00004239			WBGene00014570		WBGene00000928	WBGene00000209	WBGene00022174	WBGene00015581
WBGene00011323	WBGene00011323	WBGene00011323	WBGene00011110	WBGene00004241			WBGene00014481		WBGene00020054	WBGene00022856	WBGene00043948	WBGene00000419
WBGene00004075	WBGene00004075	WBGene00004075	WBGene00011131	WBGene00004242			WBGene00014618		WBGene00009386	WBGene00018149	WBGene00016203	WBGene00006450
WBGene00019247	WBGene00019247	WBGene00019247	WBGene00011145	WBGene00004243			WBGene00014513		WBGene00000725	WBGene00006434	WBGene00019396	WBGene00000548
WBGene00007109	WBGene00007109	WBGene00007109	WBGene00011205	WBGene00004246			WBGene00014574		WBGene00021996	WBGene00011272	WBGene00021544	WBGene00004047
WBGene00019953	WBGene00019953	WBGene00019953	WBGene00011206	WBGene00004249			WBGene00014558		WBGene00009621	WBGene00000888	WBGene00002193	WBGene00004319
WBGene00014209	WBGene00014209	WBGene00014209	WBGene00011267	WBGene00004254			WBGene00235252		WBGene00022574	WBGene00010241	WBGene00016494	WBGene00006638
WBGene00004699	WBGene00004699	WBGene00004699	WBGene00011291	WBGene00004268			WBGene00014548		WBGene00045394	WBGene00010230	WBGene00012008	WBGene00010198
WBGene00010013	WBGene00010013	WBGene00010013	WBGene00011303	WBGene00004270			WBGene00014490		WBGene00022597	WBGene00016390	WBGene00016261	WBGene00013193
WBGene00017643	WBGene00017643	WBGene00017643	WBGene00011352	WBGene00004271			WBGene00014609		WBGene00010917	WBGene00013552	WBGene00000023	WBGene00016739
WBGene00004806	WBGene00004806	WBGene00004806	WBGene00011388	WBGene00004276			WBGene00023157		WBGene00008244	WBGene00021113	WBGene00007188	WBGene00009203
WBGene00013380	WBGene00013380	WBGene00013380	WBGene00011393	WBGene00004277			WBGene00014496		WBGene00000977	WBGene00011193	WBGene00018674	WBGene00008274
WBGene00009587	WBGene00009587	WBGene00009587	WBGene00011398	WBGene00004282			WBGene00014485		WBGene00000030	WBGene00017924	WBGene00011176	WBGene00008480
WBGene00010844	WBGene00010844	WBGene00010844	WBGene00011399	WBGene00004284			WBGene00014582		WBGene00018062	WBGene00009915	WBGene00000208	WBGene00007556
WBGene00011464	WBGene00011464	WBGene00011464	WBGene00011433	WBGene00004307			WBGene00023220		WBGene00044922	WBGene00013804	WBGene00016156	WBGene00022335
WBGene00010627	WBGene00010627	WBGene00010627	WBGene00011488	WBGene00004308			WBGene00014637		WBGene00004099	WBGene00014168	WBGene00020376	WBGene00017066
WBGene00011629	WBGene00011629	WBGene00011629	WBGene00011489	WBGene00004313			WBGene00023141		WBGene00017428	WBGene00010035	WBGene00010891	WBGene00013167
WBGene00017261	WBGene00017261	WBGene00017261	WBGene00011492	WBGene00004317			WBGene00014474		WBGene00007871	WBGene00009648	WBGene00001630	WBGene00017373
WBGene00004095	WBGene00004095	WBGene00004095	WBGene00011497	WBGene00004319			WBGene00014640		WBGene00014009	WBGene00012992	WBGene00044347	WBGene00010502
WBGene00020684	WBGene00020684	WBGene00020684	WBGene00011498	WBGene00004334			WBGene00023181		WBGene00009963	WBGene00017384	WBGene00013599	WBGene00003230
WBGene00008710	WBGene00008710	WBGene00008710	WBGene00011499	WBGene00004336			WBGene00014498		WBGene00020711	WBGene00021757	WBGene00016564	WBGene00008174
WBGene00001744	WBGene00001744	WBGene00001744	WBGene00011501	WBGene00004339			WBGene00014527		WBGene00011979	WBGene00016040	WBGene00000533	WBGene00016582
WBGene00011885	WBGene00011885	WBGene00011885	WBGene00011531	WBGene00004343			WBGene00023200		WBGene00194647	WBGene00009734	WBGene00018897	WBGene00007620
WBGene00003920	WBGene00003920	WBGene00003920	WBGene00011576	WBGene00004350			WBGene00014536		WBGene00018732	WBGene00010052	WBGene00015346	WBGene00010369
WBGene00016889	WBGene00016889	WBGene00016889	WBGene00011591	WBGene00004351			WBGene00014532		WBGene00017325	WBGene00044690	WBGene00011776	WBGene00014087
WBGene00016977	WBGene00016977	WBGene00016977	WBGene00011592	WBGene00004352			WBGene00014515		WBGene00050914	WBGene00021682	WBGene00022467	WBGene00017316
WBGene00004706	WBGene00004706	WBGene00004706	WBGene00011626	WBGene00004353			WBGene00023216		WBGene00014108	WBGene00016989	WBGene00019951	WBGene00016960
WBGene00007042	WBGene00007042	WBGene00007042	WBGene00011635	WBGene00004354			WBGene00014607		WBGene00012603	WBGene00004918	WBGene00016793	WBGene00045192
WBGene00001166	WBGene00001166	WBGene00001166	WBGene00011645	WBGene00004356			WBGene00023164		WBGene00010919	WBGene00011412	WBGene00018595	WBGene00019217
WBGene00007504	WBGene00007504	WBGene00007504	WBGene00011663	WBGene00004367			WBGene00023048		WBGene00018616	WBGene00235102	WBGene00013737	WBGene00002201
WBGene00020403	WBGene00020403	WBGene00020403	WBGene00011680	WBGene00004370			WBGene00014369		WBGene00007868	WBGene00001005	WBGene00044243	WBGene00012527
WBGene00021277	WBGene00021277	WBGene00021277	WBGene00011696	WBGene00004371			WBGene00014344		WBGene00008245	WBGene00006726	WBGene00014048	WBGene00006430
WBGene00012802	WBGene00012802	WBGene00012802	WBGene00011733	WBGene00004374			WBGene00023062		WBGene00007316	WBGene00012157	WBGene00019773	WBGene00012879
WBGene00011775	WBGene00011775	WBGene00011775	WBGene00011771	WBGene00004375			WBGene00023033		WBGene00011573	WBGene00003064	WBGene00004283	WBGene00020462
WBGene00001509	WBGene00001509	WBGene00001509	WBGene00011829	WBGene00004377			WBGene00023076		WBGene00020766	WBGene00006038	WBGene00016602	WBGene00017931
WBGene00008062	WBGene00008062	WBGene00008062	WBGene00011860	WBGene00004378			WBGene00014402		WBGene00012590	WBGene00077771	WBGene00016680	WBGene00009584
WBGene00012769	WBGene00012769	WBGene00012769	WBGene00011917	WBGene00004384			WBGene00014401		WBGene00016435	WBGene00016630	WBGene00012362	WBGene00021685
WBGene00019002	WBGene00019002	WBGene00019002	WBGene00012003	WBGene00004391			WBGene00014381		WBGene00077693	WBGene00001151	WBGene00020985	WBGene00018794
WBGene00001090	WBGene00001090	WBGene00001090	WBGene00012014	WBGene00004392			WBGene00023046		WBGene00021796	WBGene00009207	WBGene00012765	WBGene00002583
WBGene00003948	WBGene00003948	WBGene00003948	WBGene00012033	WBGene00004403			WBGene00023011		WBGene00001753	WBGene00000552	WBGene00011482	WBGene00010892
WBGene00021560	WBGene00021560	WBGene00021560	WBGene00012103	WBGene00004457			WBGene00014448		WBGene00001857	WBGene00011740	WBGene00013667	WBGene00011939
WBGene00019712	WBGene00019712	WBGene00019712	WBGene00012124	WBGene00004682			WBGene00023078		WBGene00022652	WBGene00012379	WBGene00000767	WBGene00022800
WBGene00009365	WBGene00009365	WBGene00009365	WBGene00012159	WBGene00004721			WBGene00014398		WBGene00013691	WBGene00007974	WBGene00021010	WBGene00013350
WBGene00011604	WBGene00011604	WBGene00011604	WBGene00012198	WBGene00004727			WBGene00023106		WBGene00006956	WBGene00022280	WBGene00019812	WBGene00004984
WBGene00001571	WBGene00001571	WBGene00001571	WBGene00012201	WBGene00004729			WBGene00023094		WBGene00009626	WBGene00007400	WBGene00009416	WBGene00020819
WBGene00011047	WBGene00011047	WBGene00011047	WBGene00012222	WBGene00004735			WBGene00014418		WBGene00013081	WBGene00019333	WBGene00012463	WBGene00006944
WBGene00022301	WBGene00022301	WBGene00022301	WBGene00012227	WBGene00004743			WBGene00023057		WBGene00013986	WBGene00012595	WBGene00012658	WBGene00006755
WBGene00010479	WBGene00010479	WBGene00010479	WBGene00012228	WBGene00004744			WBGene00023110		WBGene00000932	WBGene00007448	WBGene00007611	WBGene00012868
WBGene00010478	WBGene00010478	WBGene00010478	WBGene00012272	WBGene00004745			WBGene00023092		WBGene00002112	WBGene00019800	WBGene00021783	WBGene00017699
WBGene00002027	WBGene00002027	WBGene00002027	WBGene00012289	WBGene00004746			WBGene00023029		WBGene00010760	WBGene00011954	WBGene00021683	WBGene00003413
WBGene00000382	WBGene00000382	WBGene00000382	WBGene00012299	WBGene00004749			WBGene00014422		WBGene00018656	WBGene00017549	WBGene00019229	WBGene00022087
WBGene00004166	WBGene00004166	WBGene00004166	WBGene00012326	WBGene00004750			WBGene00023091		WBGene00044779	WBGene00016129	WBGene00022358	WBGene00003656
WBGene00003132	WBGene00003132	WBGene00003132	WBGene00012366	WBGene00004762			WBGene00014407		WBGene00011309	WBGene00010305	WBGene00010564	WBGene00004254
WBGene00004510	WBGene00004510	WBGene00004510	WBGene00012375	WBGene00004765			WBGene00023044		WBGene00008334	WBGene00021830	WBGene00008343	WBGene00000264
WBGene00002078	WBGene00002078	WBGene00002078	WBGene00012388	WBGene00004769			WBGene00014444		WBGene00013515	WBGene00007880	WBGene00022074	WBGene00015330
WBGene00018362	WBGene00018362	WBGene00018362	WBGene00012407	WBGene00004771			WBGene00023037		WBGene00008807	WBGene00022309	WBGene00015093	WBGene00007023
WBGene00019940	WBGene00019940	WBGene00019940	WBGene00012412	WBGene00004774			WBGene00014357		WBGene00011446	WBGene00015089	WBGene00011034	WBGene00001597
WBGene00012982	WBGene00012982	WBGene00012982	WBGene00012490	WBGene00004786			WBGene00023013		WBGene00008211	WBGene00012781	WBGene00021677	WBGene00001443
WBGene00002075	WBGene00002075	WBGene00002075	WBGene00012492	WBGene00004798			WBGene00023111		WBGene00020803	WBGene00010678	WBGene00006910	WBGene00006739
WBGene00018849	WBGene00018849	WBGene00018849	WBGene00012547	WBGene00004804			WBGene00014382		WBGene00012509	WBGene00007081	WBGene00001162	WBGene00006359
WBGene00015007	WBGene00015007	WBGene00015007	WBGene00012554	WBGene00004813			WBGene00014411		WBGene00009638	WBGene00013544	WBGene00019466	WBGene00001653
WBGene00020679	WBGene00020679	WBGene00020679	WBGene00012564	WBGene00004817			WBGene00014350		WBGene00018251	WBGene00014258	WBGene00001019	WBGene00003229
WBGene00004874	WBGene00004874	WBGene00004874	WBGene00012570	WBGene00004820			WBGene00014368		WBGene00015142	WBGene00019220	WBGene00018006	WBGene00013670
WBGene00021012	WBGene00021012	WBGene00021012	WBGene00012624	WBGene00004821			WBGene00014349		WBGene00018730	WBGene00017159	WBGene00016955	WBGene00000156
WBGene00016326	WBGene00016326	WBGene00016326	WBGene00012644	WBGene00004822			WBGene00023003		WBGene00007950	WBGene00014221	WBGene00016816	WBGene00016318
WBGene00001017	WBGene00001017	WBGene00001017	WBGene00012666	WBGene00004827			WBGene00014439		WBGene00020715	WBGene00017734	WBGene00000965	WBGene00008430
WBGene00002363	WBGene00002363	WBGene00002363	WBGene00012675	WBGene00004829			WBGene00023108		WBGene00016434	WBGene00011795	WBGene00004307	WBGene00004760
WBGene00015329	WBGene00015329	WBGene00015329	WBGene00012695	WBGene00004860			WBGene00023072		WBGene00017052	WBGene00018835	WBGene00006504	WBGene00011835
WBGene00013727	WBGene00013727	WBGene00013727	WBGene00012704	WBGene00004862			WBGene00023012		WBGene00020143	WBGene00012932	WBGene00020531	WBGene00011945
WBGene00002297	WBGene00002297	WBGene00002297	WBGene00012717	WBGene00004876			WBGene00014372		WBGene00022287	WBGene00009179	WBGene00011027	WBGene00018483
WBGene00006381	WBGene00006381	WBGene00006381	WBGene00012719	WBGene00004884			WBGene00014414		WBGene00001911	WBGene00018230	WBGene00022376	WBGene00020412
WBGene00001999	WBGene00001999	WBGene00001999	WBGene00012758	WBGene00004889			WBGene00023025		WBGene00009130	WBGene00004917	WBGene00185088	WBGene00003228
WBGene00016981	WBGene00016981	WBGene00016981	WBGene00012759	WBGene00004893			WBGene00023053		WBGene00011561	WBGene00011214	WBGene00011918	WBGene00014075
WBGene00012768	WBGene00012768	WBGene00012768	WBGene00012792	WBGene00004897			WBGene00014406		WBGene00000676	WBGene00021208	WBGene00016765	WBGene00006940
WBGene00021282	WBGene00021282	WBGene00021282	WBGene00012806	WBGene00004927			WBGene00023041		WBGene00006649	WBGene00020661	WBGene00013979	WBGene00012522
WBGene00003155	WBGene00003155	WBGene00003155	WBGene00012829	WBGene00004928			WBGene00023006		WBGene00020200	WBGene00007244	WBGene00013801	WBGene00003177
WBGene00004463	WBGene00004463	WBGene00004463	WBGene00012831	WBGene00004945			WBGene00023064		WBGene00011284	WBGene00021133	WBGene00022043	WBGene00018316
WBGene00000796	WBGene00000796	WBGene00000796	WBGene00012848	WBGene00004951			WBGene00014415		WBGene00235297	WBGene00018159	WBGene00004418	WBGene00003186
WBGene00021411	WBGene00021411	WBGene00021411	WBGene00012854	WBGene00004984			WBGene00004716		WBGene00007883	WBGene00001231	WBGene00011349	WBGene00010283
WBGene00007703	WBGene00007703		WBGene00012866	WBGene00005008			WBGene00023048		WBGene00044082	WBGene00044344	WBGene00017550	WBGene00000496
WBGene00010676	WBGene00010676		WBGene00012867	WBGene00005010			WBGene00014369		WBGene00010135	WBGene00001309	WBGene00008651	WBGene00002148
WBGene00017895	WBGene00017895		WBGene00012890	WBGene00005022			WBGene00014344		WBGene00020047	WBGene00016443	WBGene00007503	WBGene00008682
WBGene00011087	WBGene00011087		WBGene00012904	WBGene00005023			WBGene00023062		WBGene00020192	WBGene00022754	WBGene00013217	WBGene00002144
WBGene00000383	WBGene00000383		WBGene00012952	WBGene00005024			WBGene00023033		WBGene00015427	WBGene00013958	WBGene00007446	WBGene00009163
WBGene00013674	WBGene00013674		WBGene00012957	WBGene00005025			WBGene00023076		WBGene00001390	WBGene00012187	WBGene00014102	WBGene00010093
WBGene00019627	WBGene00019627		WBGene00012967	WBGene00005026			WBGene00014402		WBGene00018366	WBGene00007625	WBGene00021714	WBGene00013021
WBGene00020391	WBGene00020391		WBGene00012969	WBGene00005078			WBGene00014401		WBGene00009660	WBGene00015703	WBGene00010876	WBGene00008685
WBGene00008386	WBGene00008386		WBGene00012985	WBGene00006066			WBGene00014381		WBGene00020917	WBGene00007927	WBGene00023418	WBGene00019807
WBGene00002214	WBGene00002214		WBGene00012990	WBGene00006324			WBGene00023046		WBGene00018292	WBGene00012361	WBGene00018975	WBGene00012650
WBGene00022831	WBGene00022831		WBGene00012993	WBGene00006342			WBGene00023011		WBGene00014090	WBGene00021844	WBGene00021442	WBGene00017349
WBGene00012359	WBGene00012359		WBGene00013009	WBGene00006349			WBGene00014448		WBGene00013087	WBGene00021813	WBGene00019509	WBGene00009770
WBGene00015677	WBGene00015677		WBGene00013036	WBGene00006364			WBGene00023078		WBGene00010888	WBGene00018793	WBGene00017053	WBGene00000366
WBGene00006740	WBGene00006740		WBGene00013062	WBGene00006368			WBGene00014398		WBGene00016732	WBGene00010651	WBGene00013004	WBGene00003224
WBGene00000550	WBGene00000550		WBGene00013152	WBGene00006369			WBGene00023106		WBGene00018240	WBGene00006040	WBGene00018208	WBGene00021512
WBGene00003905	WBGene00003905		WBGene00013162	WBGene00006384			WBGene00023094		WBGene00014698	WBGene00000941	WBGene00021912	WBGene00003184
WBGene00004505	WBGene00004505		WBGene00013163	WBGene00006388			WBGene00014418		WBGene00050955	WBGene00015074	WBGene00018408	WBGene00017079
WBGene00009285	WBGene00009285		WBGene00013198	WBGene00006393			WBGene00023057		WBGene00044737	WBGene00002002	WBGene00007049	WBGene00015173
WBGene00000891	WBGene00000891		WBGene00013202	WBGene00006394			WBGene00023110		WBGene00010554	WBGene00015092	WBGene00017195	WBGene00001414
WBGene00000837	WBGene00000837		WBGene00013208	WBGene00006405			WBGene00023092		WBGene00017808	WBGene00012150	WBGene00015126	WBGene00015499
WBGene00010713	WBGene00010713		WBGene00013228	WBGene00006410			WBGene00023029		WBGene00008831	WBGene00012858	WBGene00009176	WBGene00045419
WBGene00007008	WBGene00007008		WBGene00013230	WBGene00006431			WBGene00014422		WBGene00018393	WBGene00020757	WBGene00004068	WBGene00004324
WBGene00013095	WBGene00013095		WBGene00013233	WBGene00006432			WBGene00023091		WBGene00016923	WBGene00009344	WBGene00010140	WBGene00006577
WBGene00001427	WBGene00001427		WBGene00013234	WBGene00006434			WBGene00014407		WBGene00016915	WBGene00008912	WBGene00022766	WBGene00009385
WBGene00004503	WBGene00004503		WBGene00013236	WBGene00006440			WBGene00023044		WBGene00012831	WBGene00011120	WBGene00016608	WBGene00020437
WBGene00004461	WBGene00004461		WBGene00013244	WBGene00006443			WBGene00014444		WBGene00015546	WBGene00009128	WBGene00006390	WBGene00007050
WBGene00019762	WBGene00019762		WBGene00013246	WBGene00006467			WBGene00023037		WBGene00009803	WBGene00019664	WBGene00005021	WBGene00009372
WBGene00009127	WBGene00009127		WBGene00013248	WBGene00006472			WBGene00014357		WBGene00003991	WBGene00013598	WBGene00010496	WBGene00001609
WBGene00015813	WBGene00015813		WBGene00013249	WBGene00006474			WBGene00023013		WBGene00003754	WBGene00021063	WBGene00004419	WBGene00006516
WBGene00021073	WBGene00021073		WBGene00013321	WBGene00006477			WBGene00023111		WBGene00002254	WBGene00000206	WBGene00019209	WBGene00007709
WBGene00004051	WBGene00004051		WBGene00013323	WBGene00006493			WBGene00014382		WBGene00016894	WBGene00021026	WBGene00008330	WBGene00001660
WBGene00014113	WBGene00014113		WBGene00013348	WBGene00006496			WBGene00014411		WBGene00000033	WBGene00019357	WBGene00011329	WBGene00011071
WBGene00002879	WBGene00002879		WBGene00013352	WBGene00006503			WBGene00014350		WBGene00014871	WBGene00004920	WBGene00013475	WBGene00004031
WBGene00001862	WBGene00001862		WBGene00013373	WBGene00006514			WBGene00014368		WBGene00008378	WBGene00010616	WBGene00000184	WBGene00000465
WBGene00011980	WBGene00011980		WBGene00013376	WBGene00006516			WBGene00014349		WBGene00002089	WBGene00016541	WBGene00009667	WBGene00015468
WBGene00010579	WBGene00010579		WBGene00013387	WBGene00006517			WBGene00023003		WBGene00044615	WBGene00022044	WBGene00013238	WBGene00016650
WBGene00004076	WBGene00004076		WBGene00013403	WBGene00006523			WBGene00014439		WBGene00017688	WBGene00009007	WBGene00018302	WBGene00007329
WBGene00017268	WBGene00017268		WBGene00013429	WBGene00006546			WBGene00023108		WBGene00006397	WBGene00018491	WBGene00019009	WBGene00008990
WBGene00020297	WBGene00020297		WBGene00013462	WBGene00006552			WBGene00023072		WBGene00017374	WBGene00010254	WBGene00004476	WBGene00001584
WBGene00020097	WBGene00020097		WBGene00013499	WBGene00006555			WBGene00023012		WBGene00004098	WBGene00003059	WBGene00012182	WBGene00018482
WBGene00008555	WBGene00008555		WBGene00013500	WBGene00006562			WBGene00014372		WBGene00017073	WBGene00010778	WBGene00008238	WBGene00007645
WBGene00019767	WBGene00019767		WBGene00013501	WBGene00006575			WBGene00014414		WBGene00022271	WBGene00004201	WBGene00013476	WBGene00004128
WBGene00006311	WBGene00006311		WBGene00013511	WBGene00006578			WBGene00023025		WBGene00009096	WBGene00012693	WBGene00014054	WBGene00003150
WBGene00001973	WBGene00001973		WBGene00013531	WBGene00006593			WBGene00023053		WBGene00010501	WBGene00019433	WBGene00004721	WBGene00017607
WBGene00020935	WBGene00020935		WBGene00013547	WBGene00006605			WBGene00014406		WBGene00007419	WBGene00011017	WBGene00022628	WBGene00004378
WBGene00001595	WBGene00001595		WBGene00013554	WBGene00006607			WBGene00023041		WBGene00044568	WBGene00020187	WBGene00007020	WBGene00006382
WBGene00008683	WBGene00008683		WBGene00013561	WBGene00006618			WBGene00023006		WBGene00010832	WBGene00004464	WBGene00006912	WBGene00011612
WBGene00010845	WBGene00010845		WBGene00013563	WBGene00006619			WBGene00023064		WBGene00002109	WBGene00001018	WBGene00022694	WBGene00016117
WBGene00010406	WBGene00010406		WBGene00013574	WBGene00006638			WBGene00014415		WBGene00010148	WBGene00007623	WBGene00016342	WBGene00017313
WBGene00001563	WBGene00001563		WBGene00013575	WBGene00006649			WBGene00004716		WBGene00011537	WBGene00007621	WBGene00012888	WBGene00001023
WBGene00015418	WBGene00015418		WBGene00013603	WBGene00006705			WBGene00014504		WBGene00015076	WBGene00007137	WBGene00020289	WBGene00012894
WBGene00003410	WBGene00003410		WBGene00013604	WBGene00006729			WBGene00014500		WBGene00009243	WBGene00022127	WBGene00004415	WBGene00021281
WBGene00008506	WBGene00008506		WBGene00013613	WBGene00006742			WBGene00023124		WBGene00001778	WBGene00003587	WBGene00004205	WBGene00013223
WBGene00003392	WBGene00003392		WBGene00013620	WBGene00006763			WBGene00014601		WBGene00007990	WBGene00011687	WBGene00007778	WBGene00013557
WBGene00022059	WBGene00022059		WBGene00013622	WBGene00006773			WBGene00023208		WBGene00194658	WBGene00015487	WBGene00004470	WBGene00016115
WBGene00011580	WBGene00011580		WBGene00013632	WBGene00006776			WBGene00014488		WBGene00195004	WBGene00004798	WBGene00002043	WBGene00004322
WBGene00018154	WBGene00018154		WBGene00013639	WBGene00006786			WBGene00023182		WBGene00235254	WBGene00011123	WBGene00004034	WBGene00004323
WBGene00019894	WBGene00019894		WBGene00013666	WBGene00006796			WBGene00014545		WBGene00018911	WBGene00015248	WBGene00000854	WBGene00012386
WBGene00015806	WBGene00015806		WBGene00013672	WBGene00006804			WBGene00014552		WBGene00013387	WBGene00020185	WBGene00021882	WBGene00004726
WBGene00002066	WBGene00002066		WBGene00013698	WBGene00006810			WBGene00014540		WBGene00007200	WBGene00019076	WBGene00007563	WBGene00004946
WBGene00006563	WBGene00006563		WBGene00013746	WBGene00006812			WBGene00023213		WBGene00004113	WBGene00006051	WBGene00000530	WBGene00004040
WBGene00011043	WBGene00011043		WBGene00013755	WBGene00006816			WBGene00023199		WBGene00013704	WBGene00018421	WBGene00019077	WBGene00016014
WBGene00021206	WBGene00021206		WBGene00013775	WBGene00006823			WBGene00014557		WBGene00010468	WBGene00020348	WBGene00022590	WBGene00004241
WBGene00006941	WBGene00006941		WBGene00013789	WBGene00006836			WBGene00014580		WBGene00002094	WBGene00006515	WBGene00004429	WBGene00020111
WBGene00014243	WBGene00014243		WBGene00013791	WBGene00006843			WBGene00023120		WBGene00014246	WBGene00008458	WBGene00016021	WBGene00014114
WBGene00021810	WBGene00021810		WBGene00013795	WBGene00006862			WBGene00023179		WBGene00020339	WBGene00012645	WBGene00016376	WBGene00017642
WBGene00006446	WBGene00006446		WBGene00013799	WBGene00006868			WBGene00014623		WBGene00017613	WBGene00011038	WBGene00015301	WBGene00006977
WBGene00008878	WBGene00008878		WBGene00013802	WBGene00006869			WBGene00014639		WBGene00015593	WBGene00013550	WBGene00018321	WBGene00006437
WBGene00001856	WBGene00001856		WBGene00013805	WBGene00006890			WBGene00014578		WBGene00001760	WBGene00008412	WBGene00017450	WBGene00195093
WBGene00021681	WBGene00021681		WBGene00013830	WBGene00006916			WBGene00014586		WBGene00235315	WBGene00021883	WBGene00018841	WBGene00009254
WBGene00003060	WBGene00003060		WBGene00013857	WBGene00006921			WBGene00023160		WBGene00002253	WBGene00013324	WBGene00011039	WBGene00008183
WBGene00021857	WBGene00021857		WBGene00013859	WBGene00006922			WBGene00023198		WBGene00013023	WBGene00012315	WBGene00009364	WBGene00003592
WBGene00005015	WBGene00005015		WBGene00013881	WBGene00006975			WBGene00014521		WBGene00006674	WBGene00044063	WBGene00008561	WBGene00011320
WBGene00020263	WBGene00020263		WBGene00013893	WBGene00006977			WBGene00014520		WBGene00011911	WBGene00007731	WBGene00012935	WBGene00012762
WBGene00021460	WBGene00021460		WBGene00013914	WBGene00006987			WBGene00014555		WBGene00010109	WBGene00001749	WBGene00009683	WBGene00001102
WBGene00003800	WBGene00003800		WBGene00013917	WBGene00006996			WBGene00014600		WBGene00000024	WBGene00021638	WBGene00013678	WBGene00019124
WBGene00000182	WBGene00000182		WBGene00013926	WBGene00007007			WBGene00014610		WBGene00004017	WBGene00012483	WBGene00021132	WBGene00018783
WBGene00017317	WBGene00017317		WBGene00013999	WBGene00007008			WBGene00023201		WBGene00001699	WBGene00021888	WBGene00021890	WBGene00009661
WBGene00008006	WBGene00008006		WBGene00014015	WBGene00007011			WBGene00014599		WBGene00009577	WBGene00005663	WBGene00015691	WBGene00001865
WBGene00010990	WBGene00010990		WBGene00014027	WBGene00007013			WBGene00023129		WBGene00021400	WBGene00004385	WBGene00009783	WBGene00001580
WBGene00008361	WBGene00008361		WBGene00014033	WBGene00007024			WBGene00014503		WBGene00016447	WBGene00000093	WBGene00010871	WBGene00003241
WBGene00004136	WBGene00004136		WBGene00014069	WBGene00007047			WBGene00014625		WBGene00008602	WBGene00011408	WBGene00015971	WBGene00001635
WBGene00008053	WBGene00008053		WBGene00014082	WBGene00007053			WBGene00023145		WBGene00003099	WBGene00016323	WBGene00010304	WBGene00003918
WBGene00003158	WBGene00003158		WBGene00014105	WBGene00007063			WBGene00023127		WBGene00017247	WBGene00019983	WBGene00012011	WBGene00022235
WBGene00006936	WBGene00006936		WBGene00014109	WBGene00007064			WBGene00023126		WBGene00011224	WBGene00015929	WBGene00013014	WBGene00015743
WBGene00013703	WBGene00013703		WBGene00014130	WBGene00007068			WBGene00004717		WBGene00003235	WBGene00008149	WBGene00000472	WBGene00007027
WBGene00006932	WBGene00006932		WBGene00014148	WBGene00007091			WBGene00023169		WBGene00018602	WBGene00010195	WBGene00012895	WBGene00002080
WBGene00000229	WBGene00000229		WBGene00014156	WBGene00007109			WBGene00023128		WBGene00010514	WBGene00021514	WBGene00011275	WBGene00003020
WBGene00012972	WBGene00012972		WBGene00014166	WBGene00007118			WBGene00023178		WBGene00021747	WBGene00013200	WBGene00006409	WBGene00006379
WBGene00006595	WBGene00006595		WBGene00014199	WBGene00007121			WBGene00023158		WBGene00014226	WBGene00021420	WBGene00008312	WBGene00000386
WBGene00016508	WBGene00016508		WBGene00014202	WBGene00007128			WBGene00023167		WBGene00016461	WBGene00016844	WBGene00009439	WBGene00016603
WBGene00000836	WBGene00000836		WBGene00014206	WBGene00007129			WBGene00023150		WBGene00006583	WBGene00005014	WBGene00009471	WBGene00013580
WBGene00007307	WBGene00007307		WBGene00014213	WBGene00007150			WBGene00023119		WBGene00235290	WBGene00022373	WBGene00002162	WBGene00016178
WBGene00019168	WBGene00019168		WBGene00014801	WBGene00007162			WBGene00014535		WBGene00020893	WBGene00044318	WBGene00008262	WBGene00007761
WBGene00001600	WBGene00001600		WBGene00014807	WBGene00007167			WBGene00014568		WBGene00015103	WBGene00006889	WBGene00020831	WBGene00021905
WBGene00011334	WBGene00011334		WBGene00014871	WBGene00007168			WBGene00014509		WBGene00011708	WBGene00006447	WBGene00013360	WBGene00000939
WBGene00019259	WBGene00019259		WBGene00015012	WBGene00007170			WBGene00014493		WBGene00012783	WBGene00006376	WBGene00000459	WBGene00013549
WBGene00013558	WBGene00013558		WBGene00015014	WBGene00007171			WBGene00023121		WBGene00010464	WBGene00006701	WBGene00021467	WBGene00015102
WBGene00012978	WBGene00012978		WBGene00015020	WBGene00007175			WBGene00014597		WBGene00001432	WBGene00017993	WBGene00013268	WBGene00006996
WBGene00009065	WBGene00009065		WBGene00015037	WBGene00007225			WBGene00023143		WBGene00012310	WBGene00017975	WBGene00014229	WBGene00018812
WBGene00010259	WBGene00010259		WBGene00015064	WBGene00007227			WBGene00014629		WBGene00008589	WBGene00012738	WBGene00013123	WBGene00012472
WBGene00003791	WBGene00003791		WBGene00015099	WBGene00007242			WBGene00014547		WBGene00009573	WBGene00017735	WBGene00018833	WBGene00011720
WBGene00017967	WBGene00017967		WBGene00015105	WBGene00007256			WBGene00014512		WBGene00019135	WBGene00015133	WBGene00019163	WBGene00000376
WBGene00006993	WBGene00006993		WBGene00015111	WBGene00007267			WBGene00014571		WBGene00019268	WBGene00007564	WBGene00004474	WBGene00008081
WBGene00004304	WBGene00004304		WBGene00015115	WBGene00007284			WBGene00014587		WBGene00021475	WBGene00008117	WBGene00023427	WBGene00016562
WBGene00004208	WBGene00004208		WBGene00015124	WBGene00007286			WBGene00023196		WBGene00018297	WBGene00000205	WBGene00011225	WBGene00004371
WBGene00002245	WBGene00002245		WBGene00015128	WBGene00007287			WBGene00023146		WBGene00017250	WBGene00022794	WBGene00002891	WBGene00012341
WBGene00004804	WBGene00004804		WBGene00015153	WBGene00007290			WBGene00014507		WBGene00018713	WBGene00007628	WBGene00001095	WBGene00016836
WBGene00001016	WBGene00001016		WBGene00015158	WBGene00007297			WBGene00014566		WBGene00219286	WBGene00019719	WBGene00010682	WBGene00044077
WBGene00017800	WBGene00017800		WBGene00015184	WBGene00007303			WBGene00023195		WBGene00003075	WBGene00020113	WBGene00011828	WBGene00003622
WBGene00003622	WBGene00003622		WBGene00015200	WBGene00007332			WBGene00023154		WBGene00077692	WBGene00010624	WBGene00008646	WBGene00001016
WBGene00007784	WBGene00007784		WBGene00015238	WBGene00007348			WBGene00014634		WBGene00044107	WBGene00020705	WBGene00016212	WBGene00002245
WBGene00044077	WBGene00044077		WBGene00015320	WBGene00007365			WBGene00023133		WBGene00008649	WBGene00020441	WBGene00022054	WBGene00004208
WBGene00016836	WBGene00016836		WBGene00015350	WBGene00007390			WBGene00023173		WBGene00019727	WBGene00017889	WBGene00010755	WBGene00017967
WBGene00012341	WBGene00012341		WBGene00015404	WBGene00007391			WBGene00014528		WBGene00008712	WBGene00009145	WBGene00013040	WBGene00010259
WBGene00008948	WBGene00008948		WBGene00015429	WBGene00007405			WBGene00014628		WBGene00022072	WBGene00015540	WBGene00013137	WBGene00009065
WBGene00044638	WBGene00044638		WBGene00015430	WBGene00007417			WBGene00023138		WBGene00044741	WBGene00003922	WBGene00004477	WBGene00008361
WBGene00012551	WBGene00012551		WBGene00015451	WBGene00007433			WBGene00014553		WBGene00018731	WBGene00012652	WBGene00020966	WBGene00008006
WBGene00001029	WBGene00001029		WBGene00015454	WBGene00007445			WBGene00014551		WBGene00002262	WBGene00003130	WBGene00009193	WBGene00020263
WBGene00018124	WBGene00018124		WBGene00015466	WBGene00007486			WBGene00014635		WBGene00012113	WBGene00021347	WBGene00017676	WBGene00003060
WBGene00001228	WBGene00001228		WBGene00015485	WBGene00007513			WBGene00023212		WBGene00020148	WBGene00022092	WBGene00008950	WBGene00021681
WBGene00001167	WBGene00001167		WBGene00015488	WBGene00007528			WBGene00014619		WBGene00003375	WBGene00020717	WBGene00010609	WBGene00008878
WBGene00003947	WBGene00003947		WBGene00015492	WBGene00007529			WBGene00023185		WBGene00020651	WBGene00012643	WBGene00015025	WBGene00021810
WBGene00001168	WBGene00001168		WBGene00015505	WBGene00007532			WBGene00023132		WBGene00015337	WBGene00016392	WBGene00015467	WBGene00014243
WBGene00006626	WBGene00006626		WBGene00015534	WBGene00007547			WBGene00014477		WBGene00019901	WBGene00004919	WBGene00044025	WBGene00006941
WBGene00016601	WBGene00016601		WBGene00015552	WBGene00007550			WBGene00014626		WBGene00003889	WBGene00000236	WBGene00010302	WBGene00022059
WBGene00018161	WBGene00018161		WBGene00015569	WBGene00007556			WBGene00023165		WBGene00021048	WBGene00014058	WBGene00009149	WBGene00003410
WBGene00000931	WBGene00000931		WBGene00015576	WBGene00007573			WBGene00023136		WBGene00020550	WBGene00017759	WBGene00008498	WBGene00015418
WBGene00001513	WBGene00001513		WBGene00015577	WBGene00007580			WBGene00014584		WBGene00000614	WBGene00021829	WBGene00009492	WBGene00001563
WBGene00016961	WBGene00016961		WBGene00015590	WBGene00007589			WBGene00006334		WBGene00020713	WBGene00005648	WBGene00012559	WBGene00008555
WBGene00002079	WBGene00002079		WBGene00015601	WBGene00007592			WBGene00023177		WBGene00011535	WBGene00003952	WBGene00011688	WBGene00004076
WBGene00004371	WBGene00004371		WBGene00015614	WBGene00007606			WBGene00014514		WBGene00009087	WBGene00014036	WBGene00003830	WBGene00011980
WBGene00015927	WBGene00015927		WBGene00015638	WBGene00007643			WBGene00014501		WBGene00002011	WBGene00009287	WBGene00016062	WBGene00013095
WBGene00002276	WBGene00002276		WBGene00015639	WBGene00007651			WBGene00014602		WBGene00000670	WBGene00009444	WBGene00017746	WBGene00009285
WBGene00003827	WBGene00003827		WBGene00015647	WBGene00007666			WBGene00014475		WBGene00016783	WBGene00017062	WBGene00012207	WBGene00003905
WBGene00021058	WBGene00021058		WBGene00015651	WBGene00007667			WBGene00023116		WBGene00001392	WBGene00021351	WBGene00012138	WBGene00015677
WBGene00010781	WBGene00010781		WBGene00015701	WBGene00007668			WBGene00014604		WBGene00011003	WBGene00009952	WBGene00012718	WBGene00000383
WBGene00018426	WBGene00018426		WBGene00015775	WBGene00007696			WBGene00023135		WBGene00018027	WBGene00000371	WBGene00002136	WBGene00010676
WBGene00020234	WBGene00020234		WBGene00015797	WBGene00007707			WBGene00023222		WBGene00021975	WBGene00008409	WBGene00006729	WBGene00007703
WBGene00016158	WBGene00016158		WBGene00015819	WBGene00007709			WBGene00023112		WBGene00022615	WBGene00021128	WBGene00009174	WBGene00021411
WBGene00009159	WBGene00009159		WBGene00015849	WBGene00007711			WBGene00014352		WBGene00017938	WBGene00012465	WBGene00012244	WBGene00021282
WBGene00016562	WBGene00016562		WBGene00015868	WBGene00007750			WBGene00023008		WBGene00009205	WBGene00015916	WBGene00021346	WBGene00016326
WBGene00003926	WBGene00003926		WBGene00015888	WBGene00007757			WBGene00014374		WBGene00007243	WBGene00000041	WBGene00004412	WBGene00012982
WBGene00007445	WBGene00007445		WBGene00015895	WBGene00007771			WBGene00014395		WBGene00010065	WBGene00001233	WBGene00012206	WBGene00004510
WBGene00011605	WBGene00011605		WBGene00015912	WBGene00007772			WBGene00014441		WBGene00007890	WBGene00003953	WBGene00009322	WBGene00004166
WBGene00003928	WBGene00003928		WBGene00015928	WBGene00007773			WBGene00014346		WBGene00008027	WBGene00001371	WBGene00018371	WBGene00001571
WBGene00020994	WBGene00020994		WBGene00015955	WBGene00007774			WBGene00014355		WBGene00019750	WBGene00018290	WBGene00007917	WBGene00011604
WBGene00017435	WBGene00017435		WBGene00015982	WBGene00007775			WBGene00014364		WBGene00018645	WBGene00015125	WBGene00009262	WBGene00009365
WBGene00013610	WBGene00013610		WBGene00016029	WBGene00007786			WBGene00014575		WBGene00001730	WBGene00003950	WBGene00009078	WBGene00019712
WBGene00015486	WBGene00015486		WBGene00016070	WBGene00007836			WBGene00014606		WBGene00011124	WBGene00003815	WBGene00019081	WBGene00012769
WBGene00002073	WBGene00002073		WBGene00016075	WBGene00007846			WBGene00023161		WBGene00017970	WBGene00020072	WBGene00006751	WBGene00012802
WBGene00015095	WBGene00015095		WBGene00016111	WBGene00007847			WBGene00023149		WBGene00006050	WBGene00006375	WBGene00006720	WBGene00020403
WBGene00017989	WBGene00017989		WBGene00016137	WBGene00007850			WBGene00014495		WBGene00000175	WBGene00010560	WBGene00013093	WBGene00007042
WBGene00007111	WBGene00007111		WBGene00016144	WBGene00007855			WBGene00014581		WBGene00044479	WBGene00021826	WBGene00018827	WBGene00016889
WBGene00021613	WBGene00021613		WBGene00016150	WBGene00007860			WBGene00014567		WBGene00011035	WBGene00013724	WBGene00013709	WBGene00008710
WBGene00010685	WBGene00010685		WBGene00016163	WBGene00007878			WBGene00006330		WBGene00015574	WBGene00002010	WBGene00016145	WBGene00020684
WBGene00012276	WBGene00012276		WBGene00016165	WBGene00007900			WBGene00014559		WBGene00022194	WBGene00004437	WBGene00043060	WBGene00004095
WBGene00001225	WBGene00001225		WBGene00016177	WBGene00007902			WBGene00014579		WBGene00010968	WBGene00019678	WBGene00008345	WBGene00017261
WBGene00007975	WBGene00007975		WBGene00016183	WBGene00007904			WBGene00014630		WBGene00010513	WBGene00021604	WBGene00011815	WBGene00009587
WBGene00008081	WBGene00008081		WBGene00016216	WBGene00007906			WBGene00023197		WBGene00020083	WBGene00000765	WBGene00009101	WBGene00010013
WBGene00000376	WBGene00000376		WBGene00016229	WBGene00007915			WBGene00014565		WBGene00006705	WBGene00007194	WBGene00008411	WBGene00011323
WBGene00022369	WBGene00022369		WBGene00016235	WBGene00007939			WBGene00014638		WBGene00000282	WBGene00011411	WBGene00004027	WBGene00006943
WBGene00021292	WBGene00021292		WBGene00016264	WBGene00007943			WBGene00023117		WBGene00008777	WBGene00018123	WBGene00019792	WBGene00007463
WBGene00011720	WBGene00011720		WBGene00016273	WBGene00007955			WBGene00014611		WBGene00011894	WBGene00010231	WBGene00000426	WBGene00003794
WBGene00004244	WBGene00004244		WBGene00016299	WBGene00007956			WBGene00189967		WBGene00022028	WBGene00006044	WBGene00022862	WBGene00022603
WBGene00021644	WBGene00021644		WBGene00016307	WBGene00007966			WBGene00023151		WBGene00003588	WBGene00004702	WBGene00018156	WBGene00004179
WBGene00003041	WBGene00003041		WBGene00016319	WBGene00007976			WBGene00023125		WBGene00045024	WBGene00004493	WBGene00013424	WBGene00018512
WBGene00015687	WBGene00015687		WBGene00016321	WBGene00007979			WBGene00014489		WBGene00021976	WBGene00017830	WBGene00017776	WBGene00000274
WBGene00015331	WBGene00015331		WBGene00016346	WBGene00007993			WBGene00014510		WBGene00021236	WBGene00008173	WBGene00008266	WBGene00006988
WBGene00000369	WBGene00000369		WBGene00016378	WBGene00008006			WBGene00023207		WBGene00012670	WBGene00010139	WBGene00011480	WBGene00001049
WBGene00017162	WBGene00017162		WBGene00016469	WBGene00008035			WBGene00014556		WBGene00044011	WBGene00017084	WBGene00009881	WBGene00007030
WBGene00009477	WBGene00009477		WBGene00016485	WBGene00008078			WBGene00023180		WBGene00014148	WBGene00015186	WBGene00011375	WBGene00006440
WBGene00002998	WBGene00002998		WBGene00016486	WBGene00008080			WBGene00023153		WBGene00004144	WBGene00013214	WBGene00022883	WBGene00003559
WBGene00003153	WBGene00003153		WBGene00016489	WBGene00008085			WBGene00014588		WBGene00016350	WBGene00022401	WBGene00021093	WBGene00006405
WBGene00012472	WBGene00012472		WBGene00016512	WBGene00008094			WBGene00023170		WBGene00004168	WBGene00017733	WBGene00003164	WBGene00006571
WBGene00018812	WBGene00018812		WBGene00016540	WBGene00008118			WBGene00014563		WBGene00015355	WBGene00004014	WBGene00016171	WBGene00003034
WBGene00004880	WBGene00004880		WBGene00016550	WBGene00008121			WBGene00023134		WBGene00017009	WBGene00021392	WBGene00013998	WBGene00006383
WBGene00006996	WBGene00006996		WBGene00016558	WBGene00008157			WBGene00014594		WBGene00001752	WBGene00010896	WBGene00013730	WBGene00001085
WBGene00004460	WBGene00004460		WBGene00016589	WBGene00008165			WBGene00023194		WBGene00000616	WBGene00012697	WBGene00020858	WBGene00004508
WBGene00004873	WBGene00004873		WBGene00016622	WBGene00008195			WBGene00014591		WBGene00021441	WBGene00004387	WBGene00008774	WBGene00019766
WBGene00003406	WBGene00003406		WBGene00016639	WBGene00008198			WBGene00023155		WBGene00011134	WBGene00016790	WBGene00011109	WBGene00002889
WBGene00003834	WBGene00003834		WBGene00016661	WBGene00008204			WBGene00014526		WBGene00009624	WBGene00009189	WBGene00013680	WBGene00019087
WBGene00015102	WBGene00015102		WBGene00016674	WBGene00008206			WBGene00023214		WBGene00017748	WBGene00002061	WBGene00044345	WBGene00004343
WBGene00000763	WBGene00000763		WBGene00016758	WBGene00008207			WBGene00023190		WBGene00016914	WBGene00007786	WBGene00003086	WBGene00004239
WBGene00002169	WBGene00002169		WBGene00016799	WBGene00008210			WBGene00023147		WBGene00013988	WBGene00021088	WBGene00012804	WBGene00016444
WBGene00004302	WBGene00004302		WBGene00016823	WBGene00008218			WBGene00023218		WBGene00008284	WBGene00003949	WBGene00008318	WBGene00008921
WBGene00000377	WBGene00000377		WBGene00016871	WBGene00008219			WBGene00023192		WBGene00007873	WBGene00002064	WBGene00012128	WBGene00004775
WBGene00004783	WBGene00004783		WBGene00016885	WBGene00008283			WBGene00023206		WBGene00007708	WBGene00003925	WBGene00017269	WBGene00009460
WBGene00011037	WBGene00011037		WBGene00016931	WBGene00008343			WBGene00023204		WBGene00019518	WBGene00001234	WBGene00004427	WBGene00009035
WBGene00013019	WBGene00013019		WBGene00016937	WBGene00008402			WBGene00014533		WBGene00002267	WBGene00004386	WBGene00007464	WBGene00013189
WBGene00010353	WBGene00010353		WBGene00016987	WBGene00008419			WBGene00014479		WBGene00008707	WBGene00021112	WBGene00004380	WBGene00010351
WBGene00013994	WBGene00013994		WBGene00016997	WBGene00008427			WBGene00023188		WBGene00012965	WBGene00012964	WBGene00009708	WBGene00000226
WBGene00013549	WBGene00013549		WBGene00017007	WBGene00008430			WBGene00023217		WBGene00044421	WBGene00000502	WBGene00013139	WBGene00011146
WBGene00019118	WBGene00019118		WBGene00017069	WBGene00008439			WBGene00014585		WBGene00019382	WBGene00017916	WBGene00000160	WBGene00019877
WBGene00086551	WBGene00086551		WBGene00017071	WBGene00008440			WBGene00023123		WBGene00017991	WBGene00009563	WBGene00018270	WBGene00017951
WBGene00000939	WBGene00000939		WBGene00017082	WBGene00008443			WBGene00023144		WBGene00000657	WBGene00004888	WBGene00017811	WBGene00011729
WBGene00001087	WBGene00001087		WBGene00017100	WBGene00008444			WBGene00014554		WBGene00001391	WBGene00019537	WBGene00010178	WBGene00017031
WBGene00022149	WBGene00022149		WBGene00017106	WBGene00008447			WBGene00023176		WBGene00044080	WBGene00004297	WBGene00003144	WBGene00022203
WBGene00022148	WBGene00022148		WBGene00017142	WBGene00008464			WBGene00014537		WBGene00077699	WBGene00011292	WBGene00009685	WBGene00007009
WBGene00006768	WBGene00006768		WBGene00017160	WBGene00008526			WBGene00014491		WBGene00000133	WBGene00015689	WBGene00020781	WBGene00020284
WBGene00002957	WBGene00002957		WBGene00017177	WBGene00008534			WBGene00014480		WBGene00017684	WBGene00013532	WBGene00002696	WBGene00000499
WBGene00016236	WBGene00016236		WBGene00017182	WBGene00008536			WBGene00014598		WBGene00000031	WBGene00004338	WBGene00020411	WBGene00016405
WBGene00008061	WBGene00008061		WBGene00017259	WBGene00008537			WBGene00014636		WBGene00000749	WBGene00006512	WBGene00000987	WBGene00003002
WBGene00006924	WBGene00006924		WBGene00017264	WBGene00008546			WBGene00014608		WBGene00045411	WBGene00013109	WBGene00000585	WBGene00000227
WBGene00022021	WBGene00022021		WBGene00017286	WBGene00008549			WBGene00014596		WBGene00206484	WBGene00003148	WBGene00021419	WBGene00009368
WBGene00002335	WBGene00002335		WBGene00017291	WBGene00008571			WBGene00014564		WBGene00000535	WBGene00003826	WBGene00002204	WBGene00003789
WBGene00009084	WBGene00009084		WBGene00017298	WBGene00008578			WBGene00014497		WBGene00012634	WBGene00004422	WBGene00016944	WBGene00011240
WBGene00007587	WBGene00007587		WBGene00017310	WBGene00008585			WBGene00023175		WBGene00045146	WBGene00003923	WBGene00015970	WBGene00001833
WBGene00006414	WBGene00006414		WBGene00017344	WBGene00008586			WBGene00023139		WBGene00022706	WBGene00004891	WBGene00008397	WBGene00004374
WBGene00021905	WBGene00021905		WBGene00017357	WBGene00008587			WBGene00014624		WBGene00000626	WBGene00022851	WBGene00000814	WBGene00000508
WBGene00006352	WBGene00006352		WBGene00017395	WBGene00008588			WBGene00023162		WBGene00021121	WBGene00006528	WBGene00003639	WBGene00015504
WBGene00001031	WBGene00001031		WBGene00017405	WBGene00008601			WBGene00014486		WBGene00044280	WBGene00022765	WBGene00022832	WBGene00007028
WBGene00006704	WBGene00006704		WBGene00017419	WBGene00008606			WBGene00023215		WBGene00010084	WBGene00017356	WBGene00006911	WBGene00022257
WBGene00012156	WBGene00012156		WBGene00017422	WBGene00008644			WBGene00023168		WBGene00000734	WBGene00004914	WBGene00013419	WBGene00013591
WBGene00017163	WBGene00017163		WBGene00017423	WBGene00008648			WBGene00014494		WBGene00045399	WBGene00003390	WBGene00008363	WBGene00004782
WBGene00011155	WBGene00011155		WBGene00017452	WBGene00008666			WBGene00023184		WBGene00236808	WBGene00002059	WBGene00002070	WBGene00020035
WBGene00007761	WBGene00007761		WBGene00017453	WBGene00008684			WBGene00014476		WBGene00004139	WBGene00001088	WBGene00011914	WBGene00020652
WBGene00016178	WBGene00016178		WBGene00017507	WBGene00008686			WBGene00014538		WBGene00017756	WBGene00000474	WBGene00008780	WBGene00002368
WBGene00013580	WBGene00013580		WBGene00017515	WBGene00008691			WBGene00014530		WBGene00009377	WBGene00000064	WBGene00007918	WBGene00003133
WBGene00011051	WBGene00011051		WBGene00017556	WBGene00008694			WBGene00023118		WBGene00007264	WBGene00017738	WBGene00003882	WBGene00003210
WBGene00000868	WBGene00000868		WBGene00017571	WBGene00008695			WBGene00023219		WBGene00000752	WBGene00004468	WBGene00011133	WBGene00018900
WBGene00008934	WBGene00008934		WBGene00017606	WBGene00008710			WBGene00014616		WBGene00017246	WBGene00001503	WBGene00004181	WBGene00044789
WBGene00003393	WBGene00003393		WBGene00017627	WBGene00008733					WBGene00195209	WBGene00009966	WBGene00077732	WBGene00018898
WBGene00019162	WBGene00019162		WBGene00017629	WBGene00008745					WBGene00018164	WBGene00008151	WBGene00010828	WBGene00007788
WBGene00016603	WBGene00016603		WBGene00017644	WBGene00008747					WBGene00012833	WBGene00021248	WBGene00011975	WBGene00004187
WBGene00001566	WBGene00001566		WBGene00017681	WBGene00008749					WBGene00007344	WBGene00004305	WBGene00000408	WBGene00007966
WBGene00001352	WBGene00001352		WBGene00017698	WBGene00008774					WBGene00001433	WBGene00000804	WBGene00022310	WBGene00012360
WBGene00022119	WBGene00022119		WBGene00017725	WBGene00008780					WBGene00003756	WBGene00000122	WBGene00008441	WBGene00014151
WBGene00003596	WBGene00003596		WBGene00017728	WBGene00008789					WBGene00003741	WBGene00015941	WBGene00021471	WBGene00007789
WBGene00003901	WBGene00003901		WBGene00017729	WBGene00008805					WBGene00013516	WBGene00012692	WBGene00019821	WBGene00001829
WBGene00020601	WBGene00020601		WBGene00017751	WBGene00008806					WBGene00008449	WBGene00013435	WBGene00006596	WBGene00010621
WBGene00003790	WBGene00003790		WBGene00017767	WBGene00008819					WBGene00013477	WBGene00004915	WBGene00020823	WBGene00011333
WBGene00000410	WBGene00000410		WBGene00017777	WBGene00008822					WBGene00017659	WBGene00019402	WBGene00010194	WBGene00009113
WBGene00002033	WBGene00002033		WBGene00017782	WBGene00008823					WBGene00012213	WBGene00019900	WBGene00000102	WBGene00004952
WBGene00004188	WBGene00004188		WBGene00017828	WBGene00008824					WBGene00019839	WBGene00015811	WBGene00016382	WBGene00004737
WBGene00000265	WBGene00000265		WBGene00017837	WBGene00008825					WBGene00019734	WBGene00022336	WBGene00007277	WBGene00000962
WBGene00003220	WBGene00003220		WBGene00017870	WBGene00008838					WBGene00016164	WBGene00019505	WBGene00019086	WBGene00013156
WBGene00000386	WBGene00000386		WBGene00017885	WBGene00008844					WBGene00013393	WBGene00018762	WBGene00015978	WBGene00014208
WBGene00015698	WBGene00015698		WBGene00017887	WBGene00008876					WBGene00000013	WBGene00008688	WBGene00017037	WBGene00019600
WBGene00007882	WBGene00007882		WBGene00017890	WBGene00008880					WBGene00022417	WBGene00021715	WBGene00013739	WBGene00002229
WBGene00001511	WBGene00001511		WBGene00017977	WBGene00008882					WBGene00013366	WBGene00004462	WBGene00021366	WBGene00000123
WBGene00006379	WBGene00006379		WBGene00017979	WBGene00008904					WBGene00001444	WBGene00011734	WBGene00000145	WBGene00002225
WBGene00000231	WBGene00000231		WBGene00018005	WBGene00008921					WBGene00021614	WBGene00009289	WBGene00018776	WBGene00002228
WBGene00003020	WBGene00003020		WBGene00018011	WBGene00008924					WBGene00015857	WBGene00010015	WBGene00000098	WBGene00002226
WBGene00009122	WBGene00009122		WBGene00018016	WBGene00008925					WBGene00016505	WBGene00016653	WBGene00000771	WBGene00009374
WBGene00021155	WBGene00021155		WBGene00018075	WBGene00008939					WBGene00023408	WBGene00017301	WBGene00012930	WBGene00007624
WBGene00009050	WBGene00009050		WBGene00018085	WBGene00008940					WBGene00020566	WBGene00001686	WBGene00020425	WBGene00022069
WBGene00002000	WBGene00002000		WBGene00018202	WBGene00008951					WBGene00011484	WBGene00019275	WBGene00009654	WBGene00002036
WBGene00002080	WBGene00002080		WBGene00018223	WBGene00008959					WBGene00009896	WBGene00001946	WBGene00011808	WBGene00017482
WBGene00003123	WBGene00003123		WBGene00018229	WBGene00008971					WBGene00009809	WBGene00015461	WBGene00004768	WBGene00002219
WBGene00002001	WBGene00002001		WBGene00018238	WBGene00008999					WBGene00002111	WBGene00011788	WBGene00017158	WBGene00045305
WBGene00012767	WBGene00012767		WBGene00018304	WBGene00009006					WBGene00020218	WBGene00015809	WBGene00015555	WBGene00016983
WBGene00004203	WBGene00004203		WBGene00018309	WBGene00009007					WBGene00045490	WBGene00004703	WBGene00019481	WBGene00015735
WBGene00008767	WBGene00008767		WBGene00018322	WBGene00009009					WBGene00001702	WBGene00015297	WBGene00007403	WBGene00007064
WBGene00008387	WBGene00008387		WBGene00018383	WBGene00009023					WBGene00015514	WBGene00003989	WBGene00000869	WBGene00017828
WBGene00007027	WBGene00007027		WBGene00018390	WBGene00009025					WBGene00002110	WBGene00019543	WBGene00015766	WBGene00004029
WBGene00022775	WBGene00022775		WBGene00018433	WBGene00009027					WBGene00009328	WBGene00010638	WBGene00011814	WBGene00016074
WBGene00000567	WBGene00000567		WBGene00018439	WBGene00009035					WBGene00001736	WBGene00006707	WBGene00012678	WBGene00017751
WBGene00004684	WBGene00004684		WBGene00018455	WBGene00009064					WBGene00018937	WBGene00011884	WBGene00004766	WBGene00020632
WBGene00020894	WBGene00020894		WBGene00018456	WBGene00009071					WBGene00019236	WBGene00004916	WBGene00022849	WBGene00012536
WBGene00018950	WBGene00018950		WBGene00018468	WBGene00009086					WBGene00009422	WBGene00022099	WBGene00000148	WBGene00009027
WBGene00010405	WBGene00010405		WBGene00018496	WBGene00009113					WBGene00017297	WBGene00020166	WBGene00018613	WBGene00007176
WBGene00020423	WBGene00020423		WBGene00018537	WBGene00009121					WBGene00007149	WBGene00021845	WBGene00006700	WBGene00012445
WBGene00015743	WBGene00015743		WBGene00018577	WBGene00009132					WBGene00019184	WBGene00016607	WBGene00018474	WBGene00000178
WBGene00002083	WBGene00002083		WBGene00018579	WBGene00009133					WBGene00019284	WBGene00184990	WBGene00020404	WBGene00001406
WBGene00000271	WBGene00000271		WBGene00018615	WBGene00009135					WBGene00017082	WBGene00001230	WBGene00021952	WBGene00001488
WBGene00022046	WBGene00022046		WBGene00018634	WBGene00009137					WBGene00017499	WBGene00020190	WBGene00019503	WBGene00012125
WBGene00022235	WBGene00022235		WBGene00018667	WBGene00009162					WBGene00000753	WBGene00003162	WBGene00012319	WBGene00008311
WBGene00001497	WBGene00001497		WBGene00018711	WBGene00009163					WBGene00013406	WBGene00019008	WBGene00006785	WBGene00003902
WBGene00003918	WBGene00003918		WBGene00018761	WBGene00009177					WBGene00010545	WBGene00003062	WBGene00000143	WBGene00013358
WBGene00006529	WBGene00006529		WBGene00018767	WBGene00009186					WBGene00021161	WBGene00021486	WBGene00021456	WBGene00016614
WBGene00001635	WBGene00001635		WBGene00018768	WBGene00009188					WBGene00013029	WBGene00009996	WBGene00003868	WBGene00006882
WBGene00017686	WBGene00017686		WBGene00018773	WBGene00009201					WBGene00013459	WBGene00003829	WBGene00009829	WBGene00007928
WBGene00022350	WBGene00022350		WBGene00018804	WBGene00009223					WBGene00023485	WBGene00007355	WBGene00021541	WBGene00010116
WBGene00004466	WBGene00004466		WBGene00018813	WBGene00009233						WBGene00010303	WBGene00010720	WBGene00020754
WBGene00020184	WBGene00020184		WBGene00018837	WBGene00009234						WBGene00022599	WBGene00021022	WBGene00003045
WBGene00008404	WBGene00008404		WBGene00018850	WBGene00009260						WBGene00007616	WBGene00016238	WBGene00004259
WBGene00015525	WBGene00015525		WBGene00018851	WBGene00009280						WBGene00013150	WBGene00016167	WBGene00016646
WBGene00001683	WBGene00001683		WBGene00018862	WBGene00009286						WBGene00011270	WBGene00012298	WBGene00017071
WBGene00003962	WBGene00003962		WBGene00018878	WBGene00009287						WBGene00000473	WBGene00009452	WBGene00013164
WBGene00001974	WBGene00001974		WBGene00018909	WBGene00009300						WBGene00021270	WBGene00007791	WBGene00012016
WBGene00020098	WBGene00020098		WBGene00018928	WBGene00009301						WBGene00001683	WBGene00018872	WBGene00004890
WBGene00003241	WBGene00003241		WBGene00018990	WBGene00009302						WBGene00004466	WBGene00004425	WBGene00019408
WBGene00006489	WBGene00006489		WBGene00019004	WBGene00009337						WBGene00022046	WBGene00017137	WBGene00020957
WBGene00020168	WBGene00020168		WBGene00019044	WBGene00009365						WBGene00002083	WBGene00000994	WBGene00010070
WBGene00001580	WBGene00001580		WBGene00019082	WBGene00009372						WBGene00010405	WBGene00000846	WBGene00022158
WBGene00001865	WBGene00001865		WBGene00019119	WBGene00009427						WBGene00003123	WBGene00009188	WBGene00011066
WBGene00004274	WBGene00004274		WBGene00019122	WBGene00009448						WBGene00007882	WBGene00022035	WBGene00012034
WBGene00004953	WBGene00004953		WBGene00019125	WBGene00009450						WBGene00019162	WBGene00012345	WBGene00021846
WBGene00009661	WBGene00009661		WBGene00019132	WBGene00009461						WBGene00011155	WBGene00011191	WBGene00008320
WBGene00018783	WBGene00018783		WBGene00019133	WBGene00009499						WBGene00001031	WBGene00004367	WBGene00020408
WBGene00021534	WBGene00021534		WBGene00019138	WBGene00009508						WBGene00003406	WBGene00021007	WBGene00008352
WBGene00021270	WBGene00021270		WBGene00019139	WBGene00009534						WBGene00015687	WBGene00013447	WBGene00043056
WBGene00000473	WBGene00000473		WBGene00019142	WBGene00009544						WBGene00012276	WBGene00019997	WBGene00019871
WBGene00004502	WBGene00004502		WBGene00019167	WBGene00009551						WBGene00003928	WBGene00004895	WBGene00016396
WBGene00000079	WBGene00000079		WBGene00019194	WBGene00009552						WBGene00007445	WBGene00016624	WBGene00012134
WBGene00013808	WBGene00013808		WBGene00019198	WBGene00009553						WBGene00003926	WBGene00007977	WBGene00009632
WBGene00011270	WBGene00011270		WBGene00019208	WBGene00009556						WBGene00016961	WBGene00019787	WBGene00021840
WBGene00000155	WBGene00000155		WBGene00019240	WBGene00009574						WBGene00016601	WBGene00010882	WBGene00050975
WBGene00009306	WBGene00009306		WBGene00019266	WBGene00009606						WBGene00007307	WBGene00003022	WBGene00019733
WBGene00003825	WBGene00003825		WBGene00019267	WBGene00009627						WBGene00017317	WBGene00000417	WBGene00015642
WBGene00001514	WBGene00001514		WBGene00019302	WBGene00009632						WBGene00008683	WBGene00001043	WBGene00022386
WBGene00019124	WBGene00019124		WBGene00019303	WBGene00009635						WBGene00019767	WBGene00013144	WBGene00013695
WBGene00001102	WBGene00001102		WBGene00019316	WBGene00009648						WBGene00001862	WBGene00000010	WBGene00018878
WBGene00012762	WBGene00012762		WBGene00019365	WBGene00009651						WBGene00002879	WBGene00013307	WBGene00006436
WBGene00020719	WBGene00020719		WBGene00019370	WBGene00009656						WBGene00004461	WBGene00015156	WBGene00015988
WBGene00003134	WBGene00003134		WBGene00019372	WBGene00009659						WBGene00001427	WBGene00004479	WBGene00019904
WBGene00011320	WBGene00011320		WBGene00019381	WBGene00009661						WBGene00016981	WBGene00001743	WBGene00015115
WBGene00013460	WBGene00013460		WBGene00019400	WBGene00009662						WBGene00001999	WBGene00018999	WBGene00012948
WBGene00003788	WBGene00003788		WBGene00019417	WBGene00009701						WBGene00015329	WBGene00000416	WBGene00008644
WBGene00012562	WBGene00012562		WBGene00019420	WBGene00009717						WBGene00010478	WBGene00016415	WBGene00006769
WBGene00021945	WBGene00021945		WBGene00019434	WBGene00009726						WBGene00010479	WBGene00004494	WBGene00003593
WBGene00013606	WBGene00013606		WBGene00019467	WBGene00009730						WBGene00003948	WBGene00009435	WBGene00006814
WBGene00013150	WBGene00013150		WBGene00019491	WBGene00009793						WBGene00003920	WBGene00019692	WBGene00015306
WBGene00010631	WBGene00010631		WBGene00019513	WBGene00009801						WBGene00007617	WBGene00011449	WBGene00020393
WBGene00003592	WBGene00003592		WBGene00019535	WBGene00009820						WBGene00002005	WBGene00019322	WBGene00008348
WBGene00008183	WBGene00008183		WBGene00019568	WBGene00009823						WBGene00007762	WBGene00004414	WBGene00013198
WBGene00013679	WBGene00013679		WBGene00019569	WBGene00009825						WBGene00004465	WBGene00004186	WBGene00010177
WBGene00012714	WBGene00012714		WBGene00019578	WBGene00009834						WBGene00004504	WBGene00022853	WBGene00004087
WBGene00004705	WBGene00004705		WBGene00019594	WBGene00009851						WBGene00013168	WBGene00017179	WBGene00013919
WBGene00003157	WBGene00003157		WBGene00019611	WBGene00009862						WBGene00016173	WBGene00003476	WBGene00000566
WBGene00009254	WBGene00009254		WBGene00019705	WBGene00009899						WBGene00001431	WBGene00020843	WBGene00001678
WBGene00001747	WBGene00001747		WBGene00019723	WBGene00009915						WBGene00018341	WBGene00006773	WBGene00007313
WBGene00001596	WBGene00001596		WBGene00019726	WBGene00009921						WBGene00001599	WBGene00008876	WBGene00011932
WBGene00012395	WBGene00012395		WBGene00019729	WBGene00009923						WBGene00021014	WBGene00012565	WBGene00004884
WBGene00000479	WBGene00000479		WBGene00019735	WBGene00009930						WBGene00021097	WBGene00006492	WBGene00014118
WBGene00195093	WBGene00195093		WBGene00019768	WBGene00009939						WBGene00002025	WBGene00011216	WBGene00000070
WBGene00001589	WBGene00001589		WBGene00019777	WBGene00009951						WBGene00002008	WBGene00016907	WBGene00016351
WBGene00022462	WBGene00022462		WBGene00019786	WBGene00009953						WBGene00001423	WBGene00019151	WBGene00003021
WBGene00007118	WBGene00007118		WBGene00019814	WBGene00009975						WBGene00012484	WBGene00009286	WBGene00011639
WBGene00006437	WBGene00006437		WBGene00019816	WBGene00009976						WBGene00006536	WBGene00020347	WBGene00002055
WBGene00006977	WBGene00006977		WBGene00019820	WBGene00009977						WBGene00000115	WBGene00015567	WBGene00022562
WBGene00017642	WBGene00017642		WBGene00019858	WBGene00009978						WBGene00021192	WBGene00021538	WBGene00012195
WBGene00015754	WBGene00015754		WBGene00019871	WBGene00010000						WBGene00003951	WBGene00007105	WBGene00003373
WBGene00010367	WBGene00010367		WBGene00019872	WBGene00010006						WBGene00001598	WBGene00022428	WBGene00000246
WBGene00001679	WBGene00001679		WBGene00019881	WBGene00010011						WBGene00022214	WBGene00011532	WBGene00017437
WBGene00014114	WBGene00014114		WBGene00019892	WBGene00010028						WBGene00022884	WBGene00012929	WBGene00000518
WBGene00007616	WBGene00007616		WBGene00019899	WBGene00010036						WBGene00022875	WBGene00022089	WBGene00016540
WBGene00020111	WBGene00020111		WBGene00019903	WBGene00010037						WBGene00020285	WBGene00015011	WBGene00013559
WBGene00013443	WBGene00013443		WBGene00019905	WBGene00010051						WBGene00000620	WBGene00004060	WBGene00011717
WBGene00020763	WBGene00020763		WBGene00019909	WBGene00010066						WBGene00015165	WBGene00018638	WBGene00010850
WBGene00010807	WBGene00010807		WBGene00019938	WBGene00010075						WBGene00000688	WBGene00007171	WBGene00020919
WBGene00022599	WBGene00022599		WBGene00019959	WBGene00010096						WBGene00050893	WBGene00010510	WBGene00018229
WBGene00004756	WBGene00004756		WBGene00019994	WBGene00010115						WBGene00012180	WBGene00011068	WBGene00017138
WBGene00000935	WBGene00000935		WBGene00020018	WBGene00010149						WBGene00044275	WBGene00018964	WBGene00044420
WBGene00013343	WBGene00013343		WBGene00020100	WBGene00010185						WBGene00003430	WBGene00018954	WBGene00001795
WBGene00004241	WBGene00004241		WBGene00020146	WBGene00010199						WBGene00017485	WBGene00010875	WBGene00004892
WBGene00010677	WBGene00010677		WBGene00020183	WBGene00010234						WBGene00045209	WBGene00013593	WBGene00001240
WBGene00020628	WBGene00020628		WBGene00020212	WBGene00010248						WBGene00016845	WBGene00014219	WBGene00019273
WBGene00016142	WBGene00016142		WBGene00020235	WBGene00010259						WBGene00011103	WBGene00021749	WBGene00009220
WBGene00010629	WBGene00010629		WBGene00020273	WBGene00010263						WBGene00043187	WBGene00020316	WBGene00006498
WBGene00010363	WBGene00010363		WBGene00020290	WBGene00010272						WBGene00001905	WBGene00044069	WBGene00004316
WBGene00014012	WBGene00014012		WBGene00020295	WBGene00010288						WBGene00017488	WBGene00012167	WBGene00004207
WBGene00003955	WBGene00003955		WBGene00020306	WBGene00010332						WBGene00020599	WBGene00013256	WBGene00018516
WBGene00000834	WBGene00000834		WBGene00020313	WBGene00010351						WBGene00003462	WBGene00008743	WBGene00006763
WBGene00010303	WBGene00010303		WBGene00020345	WBGene00010353						WBGene00044274	WBGene00017003	WBGene00019617
WBGene00010409	WBGene00010409		WBGene00020398	WBGene00010354						WBGene00014042	WBGene00009784	WBGene00012236
WBGene00016014	WBGene00016014		WBGene00020407	WBGene00010397						WBGene00077764	WBGene00235383	WBGene00021146
WBGene00006933	WBGene00006933		WBGene00020450	WBGene00010408						WBGene00219383	WBGene00195085	WBGene00006796
WBGene00016194	WBGene00016194		WBGene00020451	WBGene00010416						WBGene00018669	WBGene00008082	WBGene00000812
WBGene00007355	WBGene00007355		WBGene00020457	WBGene00010444						WBGene00001912	WBGene00018072	WBGene00000409
WBGene00010419	WBGene00010419		WBGene00020473	WBGene00010471						WBGene00000621	WBGene00000565	WBGene00017606
WBGene00008887	WBGene00008887		WBGene00020486	WBGene00010472						WBGene00007544	WBGene00003576	WBGene00004318
WBGene00003598	WBGene00003598		WBGene00020496	WBGene00010492						WBGene00001943	WBGene00000146	WBGene00010199
WBGene00004040	WBGene00004040		WBGene00020527	WBGene00010493						WBGene00044175	WBGene00018698	WBGene00000543
WBGene00002202	WBGene00002202		WBGene00020540	WBGene00010498						WBGene00045208	WBGene00020092	WBGene00206376
WBGene00012111	WBGene00012111		WBGene00020564	WBGene00010502						WBGene00044271	WBGene00015746	WBGene00006432
WBGene00006537	WBGene00006537		WBGene00020598	WBGene00010504						WBGene00012591	WBGene00013431	WBGene00007372
WBGene00001568	WBGene00001568		WBGene00020630	WBGene00010519						WBGene00012840	WBGene00006460	WBGene00000541
WBGene00000466	WBGene00000466		WBGene00020642	WBGene00010537						WBGene00044273	WBGene00004116	WBGene00001559
WBGene00015943	WBGene00015943		WBGene00020666	WBGene00010542						WBGene00044340	WBGene00018585	WBGene00018710
WBGene00004946	WBGene00004946		WBGene00020669	WBGene00010550						WBGene00008967	WBGene00022351	WBGene00008133
WBGene00004726	WBGene00004726		WBGene00020673	WBGene00010552						WBGene00003766	WBGene00007150	WBGene00013216
WBGene00012386	WBGene00012386		WBGene00020744	WBGene00010553						WBGene00021086	WBGene00015815	WBGene00008622
WBGene00012109	WBGene00012109		WBGene00020754	WBGene00010555						WBGene00017305	WBGene00006607	WBGene00021565
WBGene00020107	WBGene00020107		WBGene00020756	WBGene00010565						WBGene00012604	WBGene00016606	WBGene00219425
WBGene00004323	WBGene00004323		WBGene00020767	WBGene00010568						WBGene00007543	WBGene00019824	WBGene00000018
WBGene00010847	WBGene00010847		WBGene00020770	WBGene00010572						WBGene00013647	WBGene00022121	WBGene00004831
WBGene00010042	WBGene00010042		WBGene00020778	WBGene00010606						WBGene00009398	WBGene00020466	WBGene00009224
WBGene00012188	WBGene00012188		WBGene00020797	WBGene00010609						WBGene00044338	WBGene00019457	WBGene00019167
WBGene00019295	WBGene00019295		WBGene00020829	WBGene00010621						WBGene00016403	WBGene00022425	WBGene00002213
WBGene00004322	WBGene00004322		WBGene00020832	WBGene00010637						WBGene00016058	WBGene00018160	WBGene00008317
WBGene00016115	WBGene00016115		WBGene00020852	WBGene00010664						WBGene00044235	WBGene00020709	WBGene00004037
WBGene00013557	WBGene00013557		WBGene00020902	WBGene00010665						WBGene00021786	WBGene00021507	WBGene00013334
WBGene00007333	WBGene00007333		WBGene00020930	WBGene00010666						WBGene00017388	WBGene00020298	WBGene00017826
WBGene00013223	WBGene00013223		WBGene00020952	WBGene00010667						WBGene00017209	WBGene00006968	WBGene00006831
WBGene00021281	WBGene00021281		WBGene00020955	WBGene00010687						WBGene00021085	WBGene00006958	WBGene00018216
WBGene00003829	WBGene00003829		WBGene00020988	WBGene00010690						WBGene00000744	WBGene00018137	WBGene00008775
WBGene00007100	WBGene00007100		WBGene00021001	WBGene00010700						WBGene00021083	WBGene00022233	WBGene00000793
WBGene00016002	WBGene00016002		WBGene00021027	WBGene00010702						WBGene00021084	WBGene00001983	WBGene00001086
WBGene00000158	WBGene00000158		WBGene00021037	WBGene00010725						WBGene00044337	WBGene00004296	WBGene00018051
WBGene00012894	WBGene00012894		WBGene00021039	WBGene00010726						WBGene00009251	WBGene00001998	WBGene00015161
WBGene00009996	WBGene00009996		WBGene00021047	WBGene00010759						WBGene00015458	WBGene00012665	WBGene00006926
WBGene00022792	WBGene00022792		WBGene00021051	WBGene00010780						WBGene00017303	WBGene00011887	WBGene00017885
WBGene00021486	WBGene00021486		WBGene00021055	WBGene00010784						WBGene00010041	WBGene00004339	WBGene00018073
WBGene00001023	WBGene00001023		WBGene00021068	WBGene00010803						WBGene00020237	WBGene00003921	WBGene00020489
WBGene00021311	WBGene00021311		WBGene00021095	WBGene00010806						WBGene00003771	WBGene00004389	WBGene00003238
WBGene00019822	WBGene00019822		WBGene00021096	WBGene00010836						WBGene00044339	WBGene00004754	WBGene00006462
WBGene00003062	WBGene00003062		WBGene00021193	WBGene00010911						WBGene00044357	WBGene00015266	WBGene00006493
WBGene00017313	WBGene00017313		WBGene00021201	WBGene00010935						WBGene00011313	WBGene00009681	WBGene00014076
WBGene00003415	WBGene00003415		WBGene00021202	WBGene00010975						WBGene00007537	WBGene00000464	WBGene00019913
WBGene00004015	WBGene00004015		WBGene00021246	WBGene00010981						WBGene00007356	WBGene00021639	WBGene00006224
WBGene00009069	WBGene00009069		WBGene00021264	WBGene00010984						WBGene00044174	WBGene00005009	WBGene00020340
WBGene00016117	WBGene00016117		WBGene00021274	WBGene00011010						WBGene00019870	WBGene00017161	WBGene00016896
WBGene00003797	WBGene00003797		WBGene00021302	WBGene00011011						WBGene00009090	WBGene00012995	WBGene00006928
WBGene00019008	WBGene00019008		WBGene00021307	WBGene00011012						WBGene00015392	WBGene00003136	WBGene00017891
WBGene00017273	WBGene00017273		WBGene00021308	WBGene00011036						WBGene00004173	WBGene00021985	WBGene00022647
WBGene00022453	WBGene00022453		WBGene00021319	WBGene00011038						WBGene00023477	WBGene00000871	WBGene00011860
WBGene00019075	WBGene00019075		WBGene00021332	WBGene00011050						WBGene00011266	WBGene00003475	WBGene00022367
WBGene00008532	WBGene00008532		WBGene00021345	WBGene00011054						WBGene00021904	WBGene00008331	WBGene00003967
WBGene00004501	WBGene00004501		WBGene00021353	WBGene00011056						WBGene00002259	WBGene00009173	WBGene00008750
WBGene00016113	WBGene00016113		WBGene00021355	WBGene00011060						WBGene00000758	WBGene00008362	WBGene00003727
WBGene00003787	WBGene00003787		WBGene00021369	WBGene00011063						WBGene00012799	WBGene00004282	WBGene00019435
WBGene00011612	WBGene00011612		WBGene00021374	WBGene00011067						WBGene00001756	WBGene00008502	WBGene00015704
WBGene00006382	WBGene00006382		WBGene00021387	WBGene00011068						WBGene00012382	WBGene00013339	WBGene00020177
WBGene00001137	WBGene00001137		WBGene00021391	WBGene00011106						WBGene00022156	WBGene00009124	WBGene00004875
WBGene00003162	WBGene00003162		WBGene00021402	WBGene00011139						WBGene00044272	WBGene00010730	WBGene00001026
WBGene00008380	WBGene00008380		WBGene00021415	WBGene00011147						WBGene00016180	WBGene00004340	WBGene00001116
WBGene00004378	WBGene00004378		WBGene00021416	WBGene00011152						WBGene00019090	WBGene00021754	WBGene00003407
WBGene00017607	WBGene00017607		WBGene00021417	WBGene00011153						WBGene00003767	WBGene00017672	WBGene00007529
WBGene00019544	WBGene00019544		WBGene00021428	WBGene00011189						WBGene00019021	WBGene00017279	WBGene00006636
WBGene00017855	WBGene00017855		WBGene00021447	WBGene00011206						WBGene00009637	WBGene00013243	WBGene00004038
WBGene00020190	WBGene00020190		WBGene00021458	WBGene00011216						WBGene00003765	WBGene00022463	WBGene00008370
WBGene00019711	WBGene00019711		WBGene00021461	WBGene00011219						WBGene00004118	WBGene00016331	WBGene00016721
WBGene00003150	WBGene00003150		WBGene00021464	WBGene00011221						WBGene00010196	WBGene00014014	WBGene00007583
WBGene00013436	WBGene00013436		WBGene00021469	WBGene00011232						WBGene00044644	WBGene00001869	WBGene00001411
WBGene00009744	WBGene00009744		WBGene00021482	WBGene00011235						WBGene00010491	WBGene00017274	WBGene00019884
WBGene00022360	WBGene00022360		WBGene00021483	WBGene00011250						WBGene00009640	WBGene00006793	WBGene00015569
WBGene00010425	WBGene00010425		WBGene00021487	WBGene00011259						WBGene00015623	WBGene00000761	WBGene00015590
WBGene00003821	WBGene00003821		WBGene00021505	WBGene00011272						WBGene00015457	WBGene00007581	WBGene00003055
WBGene00012342	WBGene00012342		WBGene00021509	WBGene00011275						WBGene00043147	WBGene00009508	WBGene00015684
WBGene00004781	WBGene00004781		WBGene00021515	WBGene00011279						WBGene00044316	WBGene00044008	WBGene00004348
WBGene00017888	WBGene00017888		WBGene00021531	WBGene00011283						WBGene00016153	WBGene00006795	WBGene00012365
WBGene00011142	WBGene00011142		WBGene00021637	WBGene00011292						WBGene00008359	WBGene00022762	WBGene00006759
WBGene00004128	WBGene00004128		WBGene00021645	WBGene00011299						WBGene00015010	WBGene00022488	WBGene00008078
WBGene00001230	WBGene00001230		WBGene00021653	WBGene00011312						WBGene00016594	WBGene00021287	WBGene00007090
WBGene00000542	WBGene00000542		WBGene00021654	WBGene00011320						WBGene00006052	WBGene00008508	WBGene00000936
WBGene00007645	WBGene00007645		WBGene00021655	WBGene00011326						WBGene00044206	WBGene00011662	WBGene00017957
WBGene00002275	WBGene00002275		WBGene00021656	WBGene00011342						WBGene00020243	WBGene00006387	WBGene00019237
WBGene00017827	WBGene00017827		WBGene00021658	WBGene00011350						WBGene00010987	WBGene00004723	WBGene00000022
WBGene00004204	WBGene00004204		WBGene00021678	WBGene00011352						WBGene00003763	WBGene00004759	WBGene00011955
WBGene00009993	WBGene00009993		WBGene00021726	WBGene00011361						WBGene00016733	WBGene00013529	WBGene00000832
WBGene00020091	WBGene00020091		WBGene00021727	WBGene00011366						WBGene00007440	WBGene00013204	WBGene00001345
WBGene00018482	WBGene00018482		WBGene00021739	WBGene00011376						WBGene00009221	WBGene00021856	WBGene00011755
WBGene00001584	WBGene00001584		WBGene00021747	WBGene00011388						WBGene00001908	WBGene00009771	WBGene00001515
WBGene00009112	WBGene00009112		WBGene00021750	WBGene00011393						WBGene00017127	WBGene00003803	WBGene00023519
WBGene00014095	WBGene00014095		WBGene00021790	WBGene00011399						WBGene00003768	WBGene00013001	WBGene00006784
WBGene00007500	WBGene00007500		WBGene00021799	WBGene00011418						WBGene00015947	WBGene00000519	WBGene00006803
WBGene00013075	WBGene00013075		WBGene00021817	WBGene00011431						WBGene00018303	WBGene00018420	WBGene00016781
WBGene00018305	WBGene00018305		WBGene00021819	WBGene00011434						WBGene00000682	WBGene00018782	WBGene00011531
WBGene00000532	WBGene00000532		WBGene00021853	WBGene00011440						WBGene00007232	WBGene00004471	WBGene00000367
WBGene00020742	WBGene00020742		WBGene00021863	WBGene00011441						WBGene00008358	WBGene00011664	WBGene00007640
WBGene00008990	WBGene00008990		WBGene00021877	WBGene00011442						WBGene00164969	WBGene00021789	WBGene00000218
WBGene00184990	WBGene00184990		WBGene00021887	WBGene00011444						WBGene00019880	WBGene00020932	WBGene00021237
WBGene00007329	WBGene00007329		WBGene00021893	WBGene00011464						WBGene00007541	WBGene00012031	WBGene00019467
WBGene00000109	WBGene00000109		WBGene00021898	WBGene00011489						WBGene00003762	WBGene00022672	WBGene00003970
WBGene00015083	WBGene00015083		WBGene00021913	WBGene00011497						WBGene00002018	WBGene00020461	WBGene00009370
WBGene00016607	WBGene00016607		WBGene00021927	WBGene00011501						WBGene00001731	WBGene00009944	WBGene00012701
WBGene00021276	WBGene00021276		WBGene00021941	WBGene00011505						WBGene00194674	WBGene00010306	WBGene00011209
WBGene00021845	WBGene00021845		WBGene00021970	WBGene00011509						WBGene00013898	WBGene00013002	WBGene00008401
WBGene00020102	WBGene00020102		WBGene00021976	WBGene00011543						WBGene00044472	WBGene00009064	WBGene00000215
WBGene00016702	WBGene00016702		WBGene00021987	WBGene00011559						WBGene00044487	WBGene00045434	WBGene00001637
WBGene00020629	WBGene00020629		WBGene00022016	WBGene00011589						WBGene00016360	WBGene00018635	WBGene00021895
WBGene00013260	WBGene00013260		WBGene00022020	WBGene00011614						WBGene00009957	WBGene00007093	WBGene00016121
WBGene00017085	WBGene00017085		WBGene00022030	WBGene00011615						WBGene00007855	WBGene00011600	WBGene00044144
WBGene00001037	WBGene00001037		WBGene00022039	WBGene00011625						WBGene00194692	WBGene00002196	WBGene00044188
WBGene00016650	WBGene00016650		WBGene00022054	WBGene00011633						WBGene00009091	WBGene00016980	WBGene00020490
WBGene00019943	WBGene00019943		WBGene00022063	WBGene00011642						WBGene00001903	WBGene00000247	WBGene00019737
WBGene00009267	WBGene00009267		WBGene00022067	WBGene00011645						WBGene00012123	WBGene00006593	WBGene00018909
WBGene00010626	WBGene00010626		WBGene00022100	WBGene00011664						WBGene00006589	WBGene00022830	WBGene00006604
WBGene00015468	WBGene00015468		WBGene00022110	WBGene00011680						WBGene00004156	WBGene00012110	WBGene00009825
WBGene00018769	WBGene00018769		WBGene00022131	WBGene00011688						WBGene00000016	WBGene00013997	WBGene00043050
WBGene00000465	WBGene00000465		WBGene00022176	WBGene00011691						WBGene00008357	WBGene00001060	WBGene00010266
WBGene00004031	WBGene00004031		WBGene00022177	WBGene00011696						WBGene00001735	WBGene00008720	WBGene00001395
WBGene00007686	WBGene00007686		WBGene00022178	WBGene00011706						WBGene00003764	WBGene00006648	WBGene00006874
WBGene00011071	WBGene00011071		WBGene00022198	WBGene00011729						WBGene00009384	WBGene00020094	WBGene00020322
WBGene00020166	WBGene00020166		WBGene00022205	WBGene00011738						WBGene00017667	WBGene00011016	WBGene00019495
WBGene00001660	WBGene00001660		WBGene00022207	WBGene00011739						WBGene00010633	WBGene00020968	WBGene00019830
WBGene00006856	WBGene00006856		WBGene00022209	WBGene00011741						WBGene00019194	WBGene00003405	WBGene00012356
WBGene00012887	WBGene00012887		WBGene00022211	WBGene00011742						WBGene00001904	WBGene00001194	WBGene00018582
WBGene00005010	WBGene00005010		WBGene00022215	WBGene00011760						WBGene00044389	WBGene00022464	WBGene00006975
WBGene00022099	WBGene00022099		WBGene00022219	WBGene00011809						WBGene00007246	WBGene00018015	WBGene00018520
WBGene00007709	WBGene00007709		WBGene00022225	WBGene00011820						WBGene00016627	WBGene00020558	WBGene00011719
WBGene00016271	WBGene00016271		WBGene00022237	WBGene00011849						WBGene00002016	WBGene00000201	WBGene00022812
WBGene00004704	WBGene00004704		WBGene00022274	WBGene00011864						WBGene00014245	WBGene00007922	WBGene00004762
WBGene00014165	WBGene00014165		WBGene00022275	WBGene00011898						WBGene00009097	WBGene00011312	WBGene00021080
WBGene00004916	WBGene00004916		WBGene00022277	WBGene00011908						WBGene00016658	WBGene00011962	WBGene00002179
WBGene00009974	WBGene00009974		WBGene00022279	WBGene00011915						WBGene00007869	WBGene00009276	WBGene00015188
WBGene00019399	WBGene00019399		WBGene00022290	WBGene00011920						WBGene00017390	WBGene00006808	WBGene00000221
WBGene00011884	WBGene00011884		WBGene00022297	WBGene00011924						WBGene00044724	WBGene00019429	WBGene00015485
WBGene00010053	WBGene00010053		WBGene00022307	WBGene00011956						WBGene00044016	WBGene00022108	WBGene00007746
WBGene00006707	WBGene00006707		WBGene00022334	WBGene00011981						WBGene00017506	WBGene00004469	WBGene00006927
WBGene00004303	WBGene00004303		WBGene00022349	WBGene00011986						WBGene00019501	WBGene00000423	WBGene00018562
WBGene00020209	WBGene00020209		WBGene00022353	WBGene00011988						WBGene00002255	WBGene00020447	WBGene00022139
WBGene00017605	WBGene00017605		WBGene00022354	WBGene00011990						WBGene00019332	WBGene00021367	WBGene00012139
WBGene00012651	WBGene00012651		WBGene00022366	WBGene00011993						WBGene00018729	WBGene00013388	WBGene00007528
WBGene00006516	WBGene00006516		WBGene00022377	WBGene00012019						WBGene00008310	WBGene00001561	WBGene00021983
WBGene00022269	WBGene00022269		WBGene00022420	WBGene00012020						WBGene00001907	WBGene00003073	WBGene00021502
WBGene00018064	WBGene00018064		WBGene00022432	WBGene00012021						WBGene00004987	WBGene00015235	WBGene00019994
WBGene00004214	WBGene00004214		WBGene00022438	WBGene00012058						WBGene00020025	WBGene00018680	WBGene00015206
WBGene00013688	WBGene00013688		WBGene00022441	WBGene00012074						WBGene00016659	WBGene00010233	WBGene00001147
WBGene00010638	WBGene00010638		WBGene00022446	WBGene00012100						WBGene00010763	WBGene00016154	WBGene00017701
WBGene00018963	WBGene00018963		WBGene00022459	WBGene00012103						WBGene00011286	WBGene00007270	WBGene00012337
WBGene00019543	WBGene00019543		WBGene00022508	WBGene00012104						WBGene00001767	WBGene00001412	WBGene00018734
WBGene00001609	WBGene00001609		WBGene00022512	WBGene00012106						WBGene00008040	WBGene00011311	WBGene00018587
WBGene00003401	WBGene00003401		WBGene00022543	WBGene00012136						WBGene00000034	WBGene00016291	WBGene00004148
WBGene00015091	WBGene00015091		WBGene00022564	WBGene00012148						WBGene00003769	WBGene00006385	WBGene00011076
WBGene00010044	WBGene00010044		WBGene00022579	WBGene00012167						WBGene00004174	WBGene00007054	WBGene00009264
WBGene00004800	WBGene00004800		WBGene00022592	WBGene00012182						WBGene00021627	WBGene00010038	WBGene00009172
WBGene00013771	WBGene00013771		WBGene00022608	WBGene00012194						WBGene00020886	WBGene00007189	WBGene00022629
WBGene00004411	WBGene00004411		WBGene00022670	WBGene00012241						WBGene00044182	WBGene00011985	WBGene00003779
WBGene00006794	WBGene00006794		WBGene00022682	WBGene00012247						WBGene00022653	WBGene00016313	WBGene00000212
WBGene00009372	WBGene00009372		WBGene00022697	WBGene00012258						WBGene00008360	WBGene00022077	WBGene00000036
WBGene00007050	WBGene00007050		WBGene00022721	WBGene00012293						WBGene00013884	WBGene00013530	WBGene00007647
WBGene00006514	WBGene00006514		WBGene00022726	WBGene00012299						WBGene00009895	WBGene00008505	WBGene00010925
WBGene00000498	WBGene00000498		WBGene00022749	WBGene00012301						WBGene00185097	WBGene00017646	WBGene00003477
WBGene00000802	WBGene00000802		WBGene00022812	WBGene00012324						WBGene00007251	WBGene00010920	WBGene00021662
WBGene00017004	WBGene00017004		WBGene00022834	WBGene00012326						WBGene00012383	WBGene00006829	WBGene00022659
WBGene00017237	WBGene00017237		WBGene00022848	WBGene00012343						WBGene00020049	WBGene00009499	WBGene00004829
WBGene00018586	WBGene00018586		WBGene00022890	WBGene00012352						WBGene00044746	WBGene00007168	WBGene00018392
WBGene00020437	WBGene00020437		WBGene00023284	WBGene00012369						WBGene00011949	WBGene00018339	WBGene00002239
WBGene00021074	WBGene00021074		WBGene00023404	WBGene00012405						WBGene00008392	WBGene00016524	WBGene00012019
WBGene00009385	WBGene00009385		WBGene00023421	WBGene00012436						WBGene00023493	WBGene00008417	WBGene00022372
WBGene00011324	WBGene00011324		WBGene00023451	WBGene00012469						WBGene00014039	WBGene00012756	WBGene00016423
WBGene00006577	WBGene00006577		WBGene00023497	WBGene00012471						WBGene00009639	WBGene00015484	WBGene00001135
WBGene00018152	WBGene00018152		WBGene00023498	WBGene00012481						WBGene00003879	WBGene00000839	WBGene00017036
WBGene00003989	WBGene00003989		WBGene00043279	WBGene00012484						WBGene00235293	WBGene00018636	WBGene00017758
WBGene00021853	WBGene00021853		WBGene00043534	WBGene00012492						WBGene00008356	WBGene00001812	WBGene00010918
WBGene00004324	WBGene00004324		WBGene00043952	WBGene00012498						WBGene00017498	WBGene00009366	WBGene00004026
WBGene00015297	WBGene00015297		WBGene00043988	WBGene00012512						WBGene00006585	WBGene00003418	WBGene00011407
WBGene00045419	WBGene00045419		WBGene00043989	WBGene00012546						WBGene00013078	WBGene00015176	WBGene00003980
WBGene00008429	WBGene00008429		WBGene00043990	WBGene00012560						WBGene00011019	WBGene00020103	WBGene00012122
WBGene00015104	WBGene00015104		WBGene00043992	WBGene00012650						WBGene00009634	WBGene00016060	WBGene00004202
WBGene00014123	WBGene00014123		WBGene00044045	WBGene00012672						WBGene00000701	WBGene00015481	WBGene00003472
WBGene00022253	WBGene00022253		WBGene00044154	WBGene00012675						WBGene00011753	WBGene00021536	WBGene00001627
WBGene00004703	WBGene00004703		WBGene00044227	WBGene00012715						WBGene00000700	WBGene00013792	WBGene00013985
WBGene00012209	WBGene00012209		WBGene00044281	WBGene00012716						WBGene00012118	WBGene00006540	WBGene00011182
WBGene00015207	WBGene00015207		WBGene00044386	WBGene00012723						WBGene00003752	WBGene00012576	WBGene00016585
WBGene00021660	WBGene00021660		WBGene00044413	WBGene00012789						WBGene00021979	WBGene00007972	WBGene00017582
WBGene00015499	WBGene00015499		WBGene00044414	WBGene00012790						WBGene00004810	WBGene00001027	WBGene00020496
WBGene00004143	WBGene00004143		WBGene00044420	WBGene00012795						WBGene00017541	WBGene00007186	WBGene00004135
WBGene00019715	WBGene00019715		WBGene00044436	WBGene00012802						WBGene00002015	WBGene00001160	WBGene00001994
WBGene00015809	WBGene00015809		WBGene00044482	WBGene00012813						WBGene00015756	WBGene00001834	WBGene00001244
WBGene00020171	WBGene00020171		WBGene00044504	WBGene00012825						WBGene00021918	WBGene00009451	WBGene00012675
WBGene00016195	WBGene00016195		WBGene00044522	WBGene00012850						WBGene00002020	WBGene00014115	WBGene00021329
WBGene00021784	WBGene00021784		WBGene00044560	WBGene00012879						WBGene00011906	WBGene00003858	WBGene00011738
WBGene00009994	WBGene00009994		WBGene00044586	WBGene00012900						WBGene00016420	WBGene00015023	WBGene00016495
WBGene00011788	WBGene00011788		WBGene00044608	WBGene00012935						WBGene00022582	WBGene00000840	WBGene00003400
WBGene00004217	WBGene00004217		WBGene00044637	WBGene00012943						WBGene00000370	WBGene00011481	WBGene00006364
WBGene00002244	WBGene00002244		WBGene00044639	WBGene00012958						WBGene00019489	WBGene00000865	WBGene00012018
WBGene00020549	WBGene00020549		WBGene00044641	WBGene00012981						WBGene00002017	WBGene00001813	WBGene00009288
WBGene00013219	WBGene00013219		WBGene00044705	WBGene00012982						WBGene00007250	WBGene00011368	WBGene00019872
WBGene00011912	WBGene00011912		WBGene00044742	WBGene00012988						WBGene00007874	WBGene00004409	WBGene00020128
WBGene00015538	WBGene00015538		WBGene00044745	WBGene00013000						WBGene00009964	WBGene00018953	WBGene00020824
WBGene00015461	WBGene00015461		WBGene00044989	WBGene00013011						WBGene00008304	WBGene00012983	WBGene00001112
WBGene00018891	WBGene00018891		WBGene00045052	WBGene00013016						WBGene00019226	WBGene00022718	WBGene00018959
WBGene00008533	WBGene00008533		WBGene00045108	WBGene00013024						WBGene00011733	WBGene00009731	WBGene00000787
WBGene00001414	WBGene00001414		WBGene00045212	WBGene00013039						WBGene00012152	WBGene00003397	WBGene00013248
WBGene00001028	WBGene00001028		WBGene00045255	WBGene00013082						WBGene00000675	WBGene00001001	WBGene00001179
WBGene00021004	WBGene00021004		WBGene00045277	WBGene00013093						WBGene00005000	WBGene00019432	WBGene00011804
WBGene00001946	WBGene00001946		WBGene00045297	WBGene00013095						WBGene00077691	WBGene00010709	WBGene00002999
WBGene00018599	WBGene00018599		WBGene00045511	WBGene00013122						WBGene00018400	WBGene00003253	WBGene00194986
WBGene00016888	WBGene00016888		WBGene00077712	WBGene00013127						WBGene00000029	WBGene00013506	WBGene00008607
WBGene00022742	WBGene00022742		WBGene00077762	WBGene00013137						WBGene00018298	WBGene00007412	WBGene00013247
WBGene00000467	WBGene00000467		WBGene00086555	WBGene00013208						WBGene00022708	WBGene00004824	WBGene00017881
WBGene00001007	WBGene00001007		WBGene00185098	WBGene00013216						WBGene00045271	WBGene00017802	WBGene00004089
WBGene00016583	WBGene00016583		WBGene00189930	WBGene00013235						WBGene00015043	WBGene00022473	WBGene00022039
WBGene00020030	WBGene00020030		WBGene00189952	WBGene00013244						WBGene00008557	WBGene00015915	WBGene00004023
WBGene00015173	WBGene00015173		WBGene00194725	WBGene00013266						WBGene00022497	WBGene00015249	WBGene00004048
WBGene00017079	WBGene00017079		WBGene00194904	WBGene00013302						WBGene00023416	WBGene00017217	WBGene00001933
WBGene00010132	WBGene00010132		WBGene00194955	WBGene00013323						WBGene00008063	WBGene00001224	WBGene00000897
WBGene00000418	WBGene00000418		WBGene00194956	WBGene00013349						WBGene00014030	WBGene00020068	WBGene00004728
WBGene00007501	WBGene00007501		WBGene00195070	WBGene00013354						WBGene00175027	WBGene00006442	WBGene00018227
WBGene00003184	WBGene00003184		WBGene00195071	WBGene00013380						WBGene00194738	WBGene00014232	WBGene00003040
WBGene00006590	WBGene00006590		WBGene00195155	WBGene00013381						WBGene00015876	WBGene00019219	WBGene00008601
WBGene00021512	WBGene00021512		WBGene00195226	WBGene00013383						WBGene00015805	WBGene00018017	WBGene00007112
WBGene00003224	WBGene00003224		WBGene00206377	WBGene00013385						WBGene00011774	WBGene00006703	WBGene00007187
WBGene00017769	WBGene00017769		WBGene00206497	WBGene00013438						WBGene00020014	WBGene00001978	WBGene00019932
WBGene00006579	WBGene00006579		WBGene00219207	WBGene00013538						WBGene00017019	WBGene00020822	WBGene00018995
WBGene00016139	WBGene00016139		WBGene00219295	WBGene00013552						WBGene00000617	WBGene00016200	WBGene00020721
WBGene00011538	WBGene00011538		WBGene00219315	WBGene00013553						WBGene00013392	WBGene00020031	WBGene00014300
WBGene00019275	WBGene00019275		WBGene00220258	WBGene00013567						WBGene00002019	WBGene00001002	WBGene00003254
WBGene00001686	WBGene00001686		WBGene00235269	WBGene00013576						WBGene00020670	WBGene00011122	WBGene00017948
WBGene00007016	WBGene00007016			WBGene00013578						WBGene00017621	WBGene00012458	WBGene00017803
WBGene00000366	WBGene00000366			WBGene00013584						WBGene00000017	WBGene00016741	WBGene00015386
WBGene00001558	WBGene00001558			WBGene00013597						WBGene00003080	WBGene00007514	WBGene00022361
WBGene00009770	WBGene00009770			WBGene00013599						WBGene00022415	WBGene00013160	WBGene00219271
WBGene00019241	WBGene00019241			WBGene00013604						WBGene00003860	WBGene00003009	WBGene00012273
WBGene00004333	WBGene00004333			WBGene00013638						WBGene00011285	WBGene00006449	WBGene00021473
WBGene00017349	WBGene00017349			WBGene00013658						WBGene00020017	WBGene00006439	WBGene00012191
WBGene00008800	WBGene00008800			WBGene00013659						WBGene00014006	WBGene00012105	WBGene00021884
WBGene00017301	WBGene00017301			WBGene00013669						WBGene00010790	WBGene00008733	WBGene00219305
WBGene00010732	WBGene00010732			WBGene00013683						WBGene00010956	WBGene00017768	WBGene00001115
WBGene00000517	WBGene00000517			WBGene00013695						WBGene00015268	WBGene00010806	WBGene00015680
WBGene00006698	WBGene00006698			WBGene00013719						WBGene00010319	WBGene00020115	WBGene00015425
WBGene00020896	WBGene00020896			WBGene00013724						WBGene00011536	WBGene00004105	WBGene00021752
WBGene00004388	WBGene00004388			WBGene00013799						WBGene00077773	WBGene00009772	WBGene00006832
WBGene00019629	WBGene00019629			WBGene00013862						WBGene00001875	WBGene00012097	WBGene00020075
WBGene00006373	WBGene00006373			WBGene00013866						WBGene00021625	WBGene00021901	WBGene00001516
WBGene00020389	WBGene00020389			WBGene00013876						WBGene00017726	WBGene00008920	WBGene00021590
WBGene00012650	WBGene00012650			WBGene00013878						WBGene00016731	WBGene00000413	WBGene00018857
WBGene00008729	WBGene00008729			WBGene00013917						WBGene00013079	WBGene00012243	WBGene00002039
WBGene00022722	WBGene00022722			WBGene00013919						WBGene00044921	WBGene00022037	WBGene00012100
WBGene00013877	WBGene00013877			WBGene00013920						WBGene00013867	WBGene00010663	WBGene00015229
WBGene00002985	WBGene00002985			WBGene00013963						WBGene00019886	WBGene00013096	WBGene00002217
WBGene00004373	WBGene00004373			WBGene00013994						WBGene00015907	WBGene00018864	WBGene00001187
WBGene00019807	WBGene00019807			WBGene00014016						WBGene00019152	WBGene00018921	WBGene00009560
WBGene00020172	WBGene00020172			WBGene00014030						WBGene00001048	WBGene00001827	WBGene00001708
WBGene00008418	WBGene00008418			WBGene00014034						WBGene00015046	WBGene00017760	WBGene00020799
WBGene00008685	WBGene00008685			WBGene00014060						WBGene00000928	WBGene00013177	WBGene00012202
WBGene00019771	WBGene00019771			WBGene00014097						WBGene00020054	WBGene00011647	WBGene00044502
WBGene00001332	WBGene00001332			WBGene00014117						WBGene00009386	WBGene00004736	WBGene00006767
WBGene00017816	WBGene00017816			WBGene00014124						WBGene00000725	WBGene00002344	WBGene00015470
WBGene00011940	WBGene00011940			WBGene00014130						WBGene00021996	WBGene00002191	WBGene00007017
WBGene00008645	WBGene00008645			WBGene00014202						WBGene00009621	WBGene00018090	WBGene00013859
WBGene00013441	WBGene00013441			WBGene00014215						WBGene00022574	WBGene00000390	WBGene00009259
WBGene00021930	WBGene00021930			WBGene00014220						WBGene00045394	WBGene00002206	WBGene00016566
WBGene00006567	WBGene00006567			WBGene00014232						WBGene00022597	WBGene00012393	WBGene00010338
WBGene00010941	WBGene00010941			WBGene00014261						WBGene00010917	WBGene00014018	WBGene00006876
WBGene00015347	WBGene00015347			WBGene00014822						WBGene00008244	WBGene00016701	WBGene00013381
WBGene00013021	WBGene00013021			WBGene00014914						WBGene00000977	WBGene00000411	WBGene00017773
WBGene00012245	WBGene00012245			WBGene00014987						WBGene00000030	WBGene00007087	WBGene00015451
WBGene00016653	WBGene00016653			WBGene00014999						WBGene00018062	WBGene00001092	WBGene00007088
WBGene00012828	WBGene00012828			WBGene00015008						WBGene00044922	WBGene00017064	WBGene00021239
WBGene00000933	WBGene00000933			WBGene00015037						WBGene00004099	WBGene00010556	WBGene00004313
WBGene00010093	WBGene00010093			WBGene00015063						WBGene00017428	WBGene00001372	WBGene00004044
WBGene00003047	WBGene00003047			WBGene00015083						WBGene00007871	WBGene00022466	WBGene00006633
WBGene00044072	WBGene00044072			WBGene00015102						WBGene00014009	WBGene00011601	WBGene00015796
WBGene00004488	WBGene00004488			WBGene00015112						WBGene00009963	WBGene00004180	WBGene00006776
WBGene00021938	WBGene00021938			WBGene00015128						WBGene00020711	WBGene00004408	WBGene00016662
WBGene00010015	WBGene00010015			WBGene00015130						WBGene00011979	WBGene00004881	WBGene00194736
WBGene00009163	WBGene00009163			WBGene00015132						WBGene00194647	WBGene00003804	WBGene00002123
WBGene00009289	WBGene00009289			WBGene00015134						WBGene00018732	WBGene00014124	WBGene00021909
WBGene00011734	WBGene00011734			WBGene00015136						WBGene00017325	WBGene00001336	WBGene00008654
WBGene00008968	WBGene00008968			WBGene00015145						WBGene00050914	WBGene00021545	WBGene00016561
WBGene00001061	WBGene00001061			WBGene00015146						WBGene00014108	WBGene00012497	WBGene00012124
WBGene00002144	WBGene00002144			WBGene00015161						WBGene00012603	WBGene00009098	WBGene00022128
WBGene00003831	WBGene00003831			WBGene00015171						WBGene00010919	WBGene00007029	WBGene00013141
WBGene00003036	WBGene00003036			WBGene00015180						WBGene00018616	WBGene00007602	WBGene00020897
WBGene00010908	WBGene00010908			WBGene00015181						WBGene00007868	WBGene00016258	WBGene00000770
WBGene00015017	WBGene00015017			WBGene00015188						WBGene00008245	WBGene00009103	WBGene00003678
WBGene00010794	WBGene00010794			WBGene00015200						WBGene00007316	WBGene00020762	WBGene00002210
WBGene00017166	WBGene00017166			WBGene00015217						WBGene00011573	WBGene00003422	WBGene00000898
WBGene00003964	WBGene00003964			WBGene00015267						WBGene00020766	WBGene00009498	WBGene00012990
WBGene00020839	WBGene00020839			WBGene00015270						WBGene00012590	WBGene00015147	WBGene00017608
WBGene00013311	WBGene00013311			WBGene00015285						WBGene00016435	WBGene00013719	WBGene00002881
WBGene00022855	WBGene00022855			WBGene00015301						WBGene00077693	WBGene00007646	WBGene00015644
WBGene00008857	WBGene00008857			WBGene00015307						WBGene00021796	WBGene00016803	WBGene00020577
WBGene00004462	WBGene00004462			WBGene00015312						WBGene00001753	WBGene00020346	WBGene00020251
WBGene00011806	WBGene00011806			WBGene00015324						WBGene00001857	WBGene00000838	WBGene00020576
WBGene00011376	WBGene00011376			WBGene00015327						WBGene00022652	WBGene00010557	WBGene00015008
WBGene00021936	WBGene00021936			WBGene00015352						WBGene00013691	WBGene00007554	WBGene00017837
WBGene00021563	WBGene00021563			WBGene00015357						WBGene00006956	WBGene00004744	WBGene00018016
WBGene00007696	WBGene00007696			WBGene00015378						WBGene00009626	WBGene00016837	WBGene00020131
WBGene00001510	WBGene00001510			WBGene00015429						WBGene00013081	WBGene00011636	WBGene00020418
WBGene00000378	WBGene00000378			WBGene00015468						WBGene00013986	WBGene00004277	WBGene00006490
WBGene00006613	WBGene00006613			WBGene00015474						WBGene00000932	WBGene00004312	WBGene00007460
WBGene00006957	WBGene00006957			WBGene00015477						WBGene00002112	WBGene00001997	WBGene00007943
WBGene00020223	WBGene00020223			WBGene00015494						WBGene00010760	WBGene00009920	WBGene00013035
WBGene00020683	WBGene00020683			WBGene00015507						WBGene00018656	WBGene00000276	WBGene00000911
WBGene00007971	WBGene00007971			WBGene00015510						WBGene00044779	WBGene00016151	WBGene00015987
WBGene00008682	WBGene00008682			WBGene00015518						WBGene00011309	WBGene00004298	WBGene00011965
WBGene00001080	WBGene00001080			WBGene00015529						WBGene00008334	WBGene00007184	WBGene00017887
WBGene00007012	WBGene00007012			WBGene00015541						WBGene00013515	WBGene00021733	WBGene00016332
WBGene00021832	WBGene00021832			WBGene00015547						WBGene00008807	WBGene00012528	WBGene00010350
WBGene00015501	WBGene00015501			WBGene00015552						WBGene00011446	WBGene00012973	WBGene00003404
WBGene00000099	WBGene00000099			WBGene00015565						WBGene00008211	WBGene00010420	WBGene00010449
WBGene00021715	WBGene00021715			WBGene00015569						WBGene00020803	WBGene00016800	WBGene00018681
WBGene00016800	WBGene00016800			WBGene00015586						WBGene00012509	WBGene00000099	WBGene00008265
WBGene00010420	WBGene00010420			WBGene00015624						WBGene00009638	WBGene00007012	WBGene00021036
WBGene00021476	WBGene00021476			WBGene00015638						WBGene00018251	WBGene00007971	WBGene00020280
WBGene00002148	WBGene00002148			WBGene00015644						WBGene00015142	WBGene00020683	WBGene00004056
WBGene00000496	WBGene00000496			WBGene00015646						WBGene00018730	WBGene00006957	WBGene00012231
WBGene00010283	WBGene00010283			WBGene00015647						WBGene00007950	WBGene00001510	WBGene00009552
WBGene00012973	WBGene00012973			WBGene00015677						WBGene00020715	WBGene00007696	WBGene00235164
WBGene00012528	WBGene00012528			WBGene00015687						WBGene00016434	WBGene00021936	WBGene00022697
WBGene00003186	WBGene00003186			WBGene00015691						WBGene00017052	WBGene00011376	WBGene00006923
WBGene00021733	WBGene00021733			WBGene00015693						WBGene00020143	WBGene00011806	WBGene00011028
WBGene00009082	WBGene00009082			WBGene00015697						WBGene00022287	WBGene00022855	WBGene00007331
WBGene00007184	WBGene00007184			WBGene00015698						WBGene00001911	WBGene00013311	WBGene00005712
WBGene00010317	WBGene00010317			WBGene00015702						WBGene00009130	WBGene00003964	WBGene00003107
WBGene00008688	WBGene00008688			WBGene00015704						WBGene00011561	WBGene00015017	WBGene00001745
WBGene00045433	WBGene00045433			WBGene00015747						WBGene00000676	WBGene00010908	WBGene00006788
WBGene00011032	WBGene00011032			WBGene00015776						WBGene00006649	WBGene00044072	WBGene00021658
WBGene00019199	WBGene00019199			WBGene00015777						WBGene00020200	WBGene00012245	WBGene00008692
WBGene00007386	WBGene00007386			WBGene00015778						WBGene00011284	WBGene00013441	WBGene00018854
WBGene00004298	WBGene00004298			WBGene00015787						WBGene00235297	WBGene00011940	WBGene00007070
WBGene00019893	WBGene00019893			WBGene00015789						WBGene00007883	WBGene00001332	WBGene00017419
WBGene00016151	WBGene00016151			WBGene00015801						WBGene00044082	WBGene00019771	WBGene00009448
WBGene00018316	WBGene00018316			WBGene00015807						WBGene00010135	WBGene00008418	WBGene00013446
WBGene00015296	WBGene00015296			WBGene00015843						WBGene00020047	WBGene00020172	WBGene00016030
WBGene00009012	WBGene00009012			WBGene00015850						WBGene00020192	WBGene00004373	WBGene00021365
WBGene00000276	WBGene00000276			WBGene00015861						WBGene00015427	WBGene00002985	WBGene00022666
WBGene00015920	WBGene00015920			WBGene00015866						WBGene00001390	WBGene00006373	WBGene00020914
WBGene00009920	WBGene00009920			WBGene00015868						WBGene00018366	WBGene00019629	WBGene00022635
WBGene00013445	WBGene00013445			WBGene00015885						WBGene00009660	WBGene00008800	WBGene00007752
WBGene00003177	WBGene00003177			WBGene00015899						WBGene00020917	WBGene00006579	WBGene00017160
WBGene00001997	WBGene00001997			WBGene00015905						WBGene00018292	WBGene00017769	WBGene00002040
WBGene00004312	WBGene00004312			WBGene00015912						WBGene00014090	WBGene00006590	WBGene00001651
WBGene00004277	WBGene00004277			WBGene00015922						WBGene00013087	WBGene00007501	WBGene00015061
WBGene00011636	WBGene00011636			WBGene00015926						WBGene00010888	WBGene00000418	WBGene00008549
WBGene00016837	WBGene00016837			WBGene00015966						WBGene00016732	WBGene00010132	WBGene00004314
WBGene00005022	WBGene00005022			WBGene00015971						WBGene00018240	WBGene00000467	WBGene00003958
WBGene00004744	WBGene00004744			WBGene00015972						WBGene00014698	WBGene00022742	WBGene00017460
WBGene00012030	WBGene00012030			WBGene00016009						WBGene00050955	WBGene00021004	WBGene00017534
WBGene00018762	WBGene00018762			WBGene00016029						WBGene00044737	WBGene00008533	WBGene00011444
WBGene00012522	WBGene00012522			WBGene00016038						WBGene00010554	WBGene00011912	WBGene00015609
WBGene00007554	WBGene00007554			WBGene00016045						WBGene00017808	WBGene00013219	WBGene00016967
WBGene00006940	WBGene00006940			WBGene00016056						WBGene00008831	WBGene00004217	WBGene00006865
WBGene00014023	WBGene00014023			WBGene00016068						WBGene00018393	WBGene00009994	WBGene00004020
WBGene00010557	WBGene00010557			WBGene00016074						WBGene00016923	WBGene00019715	WBGene00001081
WBGene00014075	WBGene00014075			WBGene00016087						WBGene00016915	WBGene00012209	WBGene00006605
WBGene00000838	WBGene00000838			WBGene00016088						WBGene00012831	WBGene00008429	WBGene00020446
WBGene00021906	WBGene00021906			WBGene00016102						WBGene00015546	WBGene00021853	WBGene00016490
WBGene00003228	WBGene00003228			WBGene00016131						WBGene00009803	WBGene00011324	WBGene00009582
WBGene00003805	WBGene00003805			WBGene00016138						WBGene00003991	WBGene00017004	WBGene00009430
WBGene00009924	WBGene00009924			WBGene00016143						WBGene00003754	WBGene00000802	WBGene00004879
WBGene00013677	WBGene00013677			WBGene00016163						WBGene00002254	WBGene00000498	WBGene00021354
WBGene00019505	WBGene00019505			WBGene00016178						WBGene00016894	WBGene00006794	WBGene00012435
WBGene00022458	WBGene00022458			WBGene00016188						WBGene00000033	WBGene00004411	WBGene00002147
WBGene00014218	WBGene00014218			WBGene00016192						WBGene00014871	WBGene00004800	WBGene00001196
WBGene00022378	WBGene00022378			WBGene00016206						WBGene00008378	WBGene00015091	WBGene00013596
WBGene00020346	WBGene00020346			WBGene00016230						WBGene00002089	WBGene00003401	WBGene00016170
WBGene00022336	WBGene00022336			WBGene00016235						WBGene00044615	WBGene00018963	WBGene00020643
WBGene00013188	WBGene00013188			WBGene00016263						WBGene00017688	WBGene00004214	WBGene00001581
WBGene00007413	WBGene00007413			WBGene00016291						WBGene00006397	WBGene00018064	WBGene00004403
WBGene00012578	WBGene00012578			WBGene00016303						WBGene00017374	WBGene00012651	WBGene00019017
WBGene00016803	WBGene00016803			WBGene00016315						WBGene00004098	WBGene00020209	WBGene00002173
WBGene00007646	WBGene00007646			WBGene00016346						WBGene00017073	WBGene00009974	WBGene00008094
WBGene00020412	WBGene00020412			WBGene00016352						WBGene00022271	WBGene00004704	WBGene00004905
WBGene00013719	WBGene00013719			WBGene00016364						WBGene00009096	WBGene00005010	WBGene00008890
WBGene00020696	WBGene00020696			WBGene00016376						WBGene00010501	WBGene00018769	WBGene00007053
WBGene00015147	WBGene00015147			WBGene00016378						WBGene00007419	WBGene00009267	WBGene00008565
WBGene00009498	WBGene00009498			WBGene00016406						WBGene00044568	WBGene00019943	WBGene00021423
WBGene00003422	WBGene00003422			WBGene00016409						WBGene00010832	WBGene00001037	WBGene00008542
WBGene00015811	WBGene00015811			WBGene00016418						WBGene00002109	WBGene00016702	WBGene00006495
WBGene00018483	WBGene00018483			WBGene00016427						WBGene00010148	WBGene00020102	WBGene00012226
WBGene00020762	WBGene00020762			WBGene00016438						WBGene00011537	WBGene00000532	WBGene00021661
WBGene00009103	WBGene00009103			WBGene00016449						WBGene00015076	WBGene00013075	WBGene00021497
WBGene00016258	WBGene00016258			WBGene00016453						WBGene00009243	WBGene00014095	WBGene00018011
WBGene00016148	WBGene00016148			WBGene00016457						WBGene00001778	WBGene00020091	WBGene00002028
WBGene00011945	WBGene00011945			WBGene00016458						WBGene00007990	WBGene00004204	WBGene00016120
WBGene00007602	WBGene00007602			WBGene00016469						WBGene00194658	WBGene00017827	WBGene00011415
WBGene00021902	WBGene00021902			WBGene00016485						WBGene00195004	WBGene00002275	WBGene00004947
WBGene00007029	WBGene00007029			WBGene00016486						WBGene00235254	WBGene00017888	WBGene00017452
WBGene00009098	WBGene00009098			WBGene00016489						WBGene00018911	WBGene00004781	WBGene00001560
WBGene00012497	WBGene00012497			WBGene00016490						WBGene00013387	WBGene00010425	WBGene00007841
WBGene00011835	WBGene00011835			WBGene00016520						WBGene00007200	WBGene00022360	WBGene00206459
WBGene00021545	WBGene00021545			WBGene00016539						WBGene00004113	WBGene00019711	WBGene00003124
WBGene00019900	WBGene00019900			WBGene00016562						WBGene00013704	WBGene00019544	WBGene00018100
WBGene00019402	WBGene00019402			WBGene00016564						WBGene00010468	WBGene00001137	WBGene00021838
WBGene00004915	WBGene00004915			WBGene00016566						WBGene00002094	WBGene00003787	WBGene00016432
WBGene00001336	WBGene00001336			WBGene00016567						WBGene00014246	WBGene00008532	WBGene00003258
WBGene00013435	WBGene00013435			WBGene00016573						WBGene00020339	WBGene00019075	WBGene00022300
WBGene00019801	WBGene00019801			WBGene00016574						WBGene00017613	WBGene00022453	WBGene00019490
WBGene00012692	WBGene00012692			WBGene00016575						WBGene00015593	WBGene00019822	WBGene00004191
WBGene00008580	WBGene00008580			WBGene00016576						WBGene00001760	WBGene00000158	WBGene00022459
WBGene00004760	WBGene00004760			WBGene00016606						WBGene00235315	WBGene00007333	WBGene00018237
WBGene00008428	WBGene00008428			WBGene00016616						WBGene00002253	WBGene00012188	WBGene00010386
WBGene00014124	WBGene00014124			WBGene00016617						WBGene00013023	WBGene00010042	WBGene00011385
WBGene00015941	WBGene00015941			WBGene00016620						WBGene00006674	WBGene00020107	WBGene00019914
WBGene00003804	WBGene00003804			WBGene00016631						WBGene00011911	WBGene00012109	WBGene00000270
WBGene00004881	WBGene00004881			WBGene00016632						WBGene00010109	WBGene00000466	WBGene00044414
WBGene00000122	WBGene00000122			WBGene00016635						WBGene00000024	WBGene00001568	WBGene00001819
WBGene00021735	WBGene00021735			WBGene00016642						WBGene00004017	WBGene00002202	WBGene00019521
WBGene00017125	WBGene00017125			WBGene00016671						WBGene00001699	WBGene00003598	WBGene00006801
WBGene00004408	WBGene00004408			WBGene00016695						WBGene00009577	WBGene00008887	WBGene00014214
WBGene00008430	WBGene00008430			WBGene00016704						WBGene00021400	WBGene00016194	WBGene00007626
WBGene00004180	WBGene00004180			WBGene00016710						WBGene00016447	WBGene00006933	WBGene00004862
WBGene00013094	WBGene00013094			WBGene00016712						WBGene00008602	WBGene00000834	WBGene00006820
WBGene00044321	WBGene00044321			WBGene00016713						WBGene00003099	WBGene00010363	WBGene00001131
WBGene00004185	WBGene00004185			WBGene00016725						WBGene00017247	WBGene00020628	WBGene00014166
WBGene00011648	WBGene00011648			WBGene00016745						WBGene00011224	WBGene00013343	WBGene00012358
WBGene00000804	WBGene00000804			WBGene00016764						WBGene00003235	WBGene00000935	WBGene00017703
WBGene00011273	WBGene00011273			WBGene00016792						WBGene00018602	WBGene00004756	WBGene00013235
WBGene00011601	WBGene00011601			WBGene00016810						WBGene00010514	WBGene00010807	WBGene00010212
WBGene00022678	WBGene00022678			WBGene00016816						WBGene00021747	WBGene00020763	WBGene00006668
WBGene00000883	WBGene00000883			WBGene00016822						WBGene00014226	WBGene00013443	WBGene00011325
WBGene00003783	WBGene00003783			WBGene00016823						WBGene00016461	WBGene00001679	WBGene00013348
WBGene00004101	WBGene00004101			WBGene00016824						WBGene00006583	WBGene00010367	WBGene00016644
WBGene00001972	WBGene00001972			WBGene00016836						WBGene00235290	WBGene00015754	WBGene00009387
WBGene00004305	WBGene00004305			WBGene00016846						WBGene00020893	WBGene00007118	WBGene00011236
WBGene00001793	WBGene00001793			WBGene00016849						WBGene00015103	WBGene00022462	WBGene00020649
WBGene00016318	WBGene00016318			WBGene00016864						WBGene00011708	WBGene00001589	WBGene00000396
WBGene00016460	WBGene00016460			WBGene00016866						WBGene00012783	WBGene00012395	WBGene00011423
WBGene00008919	WBGene00008919			WBGene00016867						WBGene00010464	WBGene00003157	WBGene00001650
WBGene00016356	WBGene00016356			WBGene00016868						WBGene00001432	WBGene00013679	WBGene00021205
WBGene00021248	WBGene00021248			WBGene00016889						WBGene00012310	WBGene00010631	WBGene00015580
WBGene00000156	WBGene00000156			WBGene00016905						WBGene00008589	WBGene00013606	WBGene00018350
WBGene00013267	WBGene00013267			WBGene00016937						WBGene00009573	WBGene00021945	WBGene00017592
WBGene00022466	WBGene00022466			WBGene00016939						WBGene00019135	WBGene00012562	WBGene00019959
WBGene00001372	WBGene00001372			WBGene00016955						WBGene00019268	WBGene00003788	WBGene00013694
WBGene00013670	WBGene00013670			WBGene00016966						WBGene00021475	WBGene00013460	WBGene00013639
WBGene00010556	WBGene00010556			WBGene00016970						WBGene00018297	WBGene00020719	WBGene00022200
WBGene00017064	WBGene00017064			WBGene00016987						WBGene00017250	WBGene00001514	WBGene00018335
WBGene00010890	WBGene00010890			WBGene00016995						WBGene00018713	WBGene00003825	WBGene00018862
WBGene00008995	WBGene00008995			WBGene00017003						WBGene00219286	WBGene00009306	WBGene00006830
WBGene00008151	WBGene00008151			WBGene00017010						WBGene00003075	WBGene00000155	WBGene00011384
WBGene00003229	WBGene00003229			WBGene00017028						WBGene00077692	WBGene00021534	WBGene00010374
WBGene00009966	WBGene00009966			WBGene00017031						WBGene00044107	WBGene00004953	WBGene00011441
WBGene00001092	WBGene00001092			WBGene00017038						WBGene00008649	WBGene00020168	WBGene00001493
WBGene00015591	WBGene00015591			WBGene00017045						WBGene00019727	WBGene00001974	WBGene00004438
WBGene00007087	WBGene00007087			WBGene00017046						WBGene00008712	WBGene00015525	WBGene00006815
WBGene00007436	WBGene00007436			WBGene00017053						WBGene00022072	WBGene00008404	WBGene00002003
WBGene00001653	WBGene00001653			WBGene00017070						WBGene00044741	WBGene00022350	WBGene00013353
WBGene00016073	WBGene00016073			WBGene00017134						WBGene00018731	WBGene00017686	WBGene00010923
WBGene00000411	WBGene00000411			WBGene00017137						WBGene00002262	WBGene00000271	WBGene00021103
WBGene00006359	WBGene00006359			WBGene00017141						WBGene00012113	WBGene00004684	WBGene00004751
WBGene00010048	WBGene00010048			WBGene00017142						WBGene00020148	WBGene00022775	WBGene00000219
WBGene00003835	WBGene00003835			WBGene00017143						WBGene00003375	WBGene00008387	WBGene00004049
WBGene00000379	WBGene00000379			WBGene00017147						WBGene00020651	WBGene00008767	WBGene00006752
WBGene00002251	WBGene00002251			WBGene00017177						WBGene00015337	WBGene00004203	WBGene00013131
WBGene00001503	WBGene00001503			WBGene00017178						WBGene00019901	WBGene00012767	WBGene00006369
WBGene00004468	WBGene00004468			WBGene00017190						WBGene00003889	WBGene00021155	WBGene00018101
WBGene00020269	WBGene00020269			WBGene00017263						WBGene00021048	WBGene00000231	WBGene00019462
WBGene00006739	WBGene00006739			WBGene00017293						WBGene00020550	WBGene00001511	WBGene00002192
WBGene00001443	WBGene00001443			WBGene00017298						WBGene00000614	WBGene00003220	WBGene00010134
WBGene00013434	WBGene00013434			WBGene00017317						WBGene00020713	WBGene00000265	WBGene00015389
WBGene00017738	WBGene00017738			WBGene00017339						WBGene00011535	WBGene00000410	WBGene00017332
WBGene00016701	WBGene00016701			WBGene00017342						WBGene00009087	WBGene00022119	WBGene00010910
WBGene00018294	WBGene00018294			WBGene00017352						WBGene00002011	WBGene00003393	WBGene00012911
WBGene00016182	WBGene00016182			WBGene00017369						WBGene00000670	WBGene00011051	WBGene00003919
WBGene00014018	WBGene00014018			WBGene00017380						WBGene00016783	WBGene00006352	WBGene00007614
WBGene00007195	WBGene00007195			WBGene00017402						WBGene00001392	WBGene00007587	WBGene00019598
WBGene00012393	WBGene00012393			WBGene00017407						WBGene00011003	WBGene00002335	WBGene00018193
WBGene00001597	WBGene00001597			WBGene00017419						WBGene00018027	WBGene00008061	WBGene00004855
WBGene00002206	WBGene00002206			WBGene00017423						WBGene00021975	WBGene00016236	WBGene00017597
WBGene00000390	WBGene00000390			WBGene00017431						WBGene00022615	WBGene00002957	WBGene00013803
WBGene00018090	WBGene00018090			WBGene00017445						WBGene00017938	WBGene00006768	WBGene00020504
WBGene00002191	WBGene00002191			WBGene00017472						WBGene00009205	WBGene00022148	WBGene00002295
WBGene00007023	WBGene00007023			WBGene00017480						WBGene00007243	WBGene00001087	WBGene00021852
WBGene00002344	WBGene00002344			WBGene00017530						WBGene00010065	WBGene00086551	WBGene00006915
WBGene00004736	WBGene00004736			WBGene00017532						WBGene00007890	WBGene00019118	WBGene00022181
WBGene00006708	WBGene00006708			WBGene00017538						WBGene00008027	WBGene00013994	WBGene00003068
WBGene00017928	WBGene00017928			WBGene00017548						WBGene00019750	WBGene00013019	WBGene00020964
WBGene00011647	WBGene00011647			WBGene00017556						WBGene00018645	WBGene00011037	WBGene00249815
WBGene00013177	WBGene00013177			WBGene00017563						WBGene00001730	WBGene00002169	WBGene00004423
WBGene00015330	WBGene00015330			WBGene00017583						WBGene00011124	WBGene00003834	WBGene00012220
WBGene00017760	WBGene00017760			WBGene00017584						WBGene00017970	WBGene00004873	WBGene00000908
WBGene00001827	WBGene00001827			WBGene00017587						WBGene00006050	WBGene00004880	WBGene00016788
WBGene00015308	WBGene00015308			WBGene00017606						WBGene00000175	WBGene00003153	WBGene00021238
WBGene00007135	WBGene00007135			WBGene00017676						WBGene00044479	WBGene00002998	WBGene00003730
WBGene00018921	WBGene00018921			WBGene00017696						WBGene00011035	WBGene00009477	WBGene00022389
WBGene00000064	WBGene00000064			WBGene00017702						WBGene00015574	WBGene00004244	WBGene00009201
WBGene00019129	WBGene00019129			WBGene00017712						WBGene00022194	WBGene00010685	WBGene00000214
WBGene00000264	WBGene00000264			WBGene00017757						WBGene00010968	WBGene00021613	WBGene00011436
WBGene00015975	WBGene00015975			WBGene00017766						WBGene00010513	WBGene00017989	WBGene00006576
WBGene00018864	WBGene00018864			WBGene00017777						WBGene00020083	WBGene00002073	WBGene00009204
WBGene00004254	WBGene00004254			WBGene00017786						WBGene00006705	WBGene00015486	WBGene00013119
WBGene00013096	WBGene00013096			WBGene00017826						WBGene00000282	WBGene00013610	WBGene00006594
WBGene00001161	WBGene00001161			WBGene00017837						WBGene00008777	WBGene00017435	WBGene00001663
WBGene00003656	WBGene00003656			WBGene00017843						WBGene00011894	WBGene00011605	WBGene00001177
WBGene00004416	WBGene00004416			WBGene00017864						WBGene00022028	WBGene00020234	WBGene00016163
WBGene00022087	WBGene00022087			WBGene00017885						WBGene00003588	WBGene00021058	WBGene00012866
WBGene00019246	WBGene00019246			WBGene00017891						WBGene00045024	WBGene00003827	WBGene00018572
WBGene00010663	WBGene00010663			WBGene00017895						WBGene00021976	WBGene00002276	WBGene00022435
WBGene00012496	WBGene00012496			WBGene00017898						WBGene00021236	WBGene00015927	WBGene00001955
WBGene00012928	WBGene00012928			WBGene00017908						WBGene00012670	WBGene00002079	WBGene00003687
WBGene00022037	WBGene00022037			WBGene00017930						WBGene00044011	WBGene00001513	WBGene00008665
WBGene00012243	WBGene00012243			WBGene00017931						WBGene00014148	WBGene00000931	WBGene00006062
WBGene00003413	WBGene00003413			WBGene00017933						WBGene00004144	WBGene00018161	WBGene00010658
WBGene00004506	WBGene00004506			WBGene00017934						WBGene00016350	WBGene00012551	WBGene00003170
WBGene00001258	WBGene00001258			WBGene00017939						WBGene00004168	WBGene00008948	WBGene00019197
WBGene00000413	WBGene00000413			WBGene00017947						WBGene00015355	WBGene00017800	WBGene00022138
WBGene00017699	WBGene00017699			WBGene00017948						WBGene00017009	WBGene00006993	WBGene00018130
WBGene00008920	WBGene00008920			WBGene00017954						WBGene00001752	WBGene00003791	WBGene00016029
WBGene00021901	WBGene00021901			WBGene00017985						WBGene00000616	WBGene00012978	WBGene00008298
WBGene00007385	WBGene00007385			WBGene00017986						WBGene00021441	WBGene00013558	WBGene00022413
WBGene00009308	WBGene00009308			WBGene00018011						WBGene00011134	WBGene00019259	WBGene00015635
WBGene00000474	WBGene00000474			WBGene00018037						WBGene00009624	WBGene00016508	WBGene00044258
WBGene00001088	WBGene00001088			WBGene00018041						WBGene00017748	WBGene00012972	WBGene00013225
WBGene00003818	WBGene00003818			WBGene00018044						WBGene00016914	WBGene00000229	WBGene00010619
WBGene00012868	WBGene00012868			WBGene00018061						WBGene00013988	WBGene00006932	WBGene00019731
WBGene00002059	WBGene00002059			WBGene00018075						WBGene00008284	WBGene00013703	WBGene00023489
WBGene00003390	WBGene00003390			WBGene00018076						WBGene00007873	WBGene00003158	WBGene00044250
WBGene00007235	WBGene00007235			WBGene00018077						WBGene00007708	WBGene00004136	WBGene00019779
WBGene00012097	WBGene00012097			WBGene00018099						WBGene00019518	WBGene00003800	WBGene00235274
WBGene00009553	WBGene00009553			WBGene00018140						WBGene00002267	WBGene00005015	WBGene00003003
WBGene00011300	WBGene00011300			WBGene00018164						WBGene00008707	WBGene00002066	WBGene00008434
WBGene00009772	WBGene00009772			WBGene00018189						WBGene00012965	WBGene00015806	WBGene00011746
WBGene00003916	WBGene00003916			WBGene00018199						WBGene00044421	WBGene00019894	WBGene00004361
WBGene00009079	WBGene00009079			WBGene00018212						WBGene00019382	WBGene00010406	WBGene00010731
WBGene00011951	WBGene00011951			WBGene00018226						WBGene00017991	WBGene00001595	WBGene00000225
WBGene00004105	WBGene00004105			WBGene00018238						WBGene00000657	WBGene00020935	WBGene00021391
WBGene00004914	WBGene00004914			WBGene00018249						WBGene00001391	WBGene00020097	WBGene00011913
WBGene00020115	WBGene00020115			WBGene00018259						WBGene00044080	WBGene00020297	WBGene00044045
WBGene00006755	WBGene00006755			WBGene00018265						WBGene00077699	WBGene00010579	WBGene00195246
WBGene00006944	WBGene00006944			WBGene00018294						WBGene00000133	WBGene00004051	WBGene00022211
WBGene00013209	WBGene00013209			WBGene00018302						WBGene00017684	WBGene00015813	WBGene00008579
WBGene00010806	WBGene00010806			WBGene00018321						WBGene00000031	WBGene00019762	WBGene00004856
WBGene00002250	WBGene00002250			WBGene00018325						WBGene00000749	WBGene00007008	WBGene00020859
WBGene00017768	WBGene00017768			WBGene00018330						WBGene00045411	WBGene00010713	WBGene00007275
WBGene00014205	WBGene00014205			WBGene00018337						WBGene00206484	WBGene00000837	WBGene00016825
WBGene00020819	WBGene00020819			WBGene00018355						WBGene00000535	WBGene00000550	WBGene00000652
WBGene00008733	WBGene00008733			WBGene00018374						WBGene00012634	WBGene00006740	WBGene00017741
WBGene00012105	WBGene00012105			WBGene00018386						WBGene00045146	WBGene00022831	WBGene00010813
WBGene00017356	WBGene00017356			WBGene00018420						WBGene00022706	WBGene00002214	WBGene00000140
WBGene00008514	WBGene00008514			WBGene00018424						WBGene00000626	WBGene00019627	WBGene00008901
WBGene00006733	WBGene00006733			WBGene00018438						WBGene00021121	WBGene00011087	WBGene00017921
WBGene00009937	WBGene00009937			WBGene00018439						WBGene00044280	WBGene00017895	WBGene00005529
WBGene00022765	WBGene00022765			WBGene00018443						WBGene00010084	WBGene00000796	WBGene00008997
WBGene00006439	WBGene00006439			WBGene00018446						WBGene00000734	WBGene00003155	WBGene00005528
WBGene00016412	WBGene00016412			WBGene00018518						WBGene00045399	WBGene00001017	WBGene00010768
WBGene00004984	WBGene00004984			WBGene00018520						WBGene00236808	WBGene00021012	WBGene00016354
WBGene00013350	WBGene00013350			WBGene00018533						WBGene00004139	WBGene00004874	WBGene00001394
WBGene00006449	WBGene00006449			WBGene00018561						WBGene00017756	WBGene00020679	WBGene00004192
WBGene00003009	WBGene00003009			WBGene00018572						WBGene00009377	WBGene00015007	WBGene00013567
WBGene00003037	WBGene00003037			WBGene00018577						WBGene00007264	WBGene00018849	WBGene00010836
WBGene00013160	WBGene00013160			WBGene00018578						WBGene00000752	WBGene00002075	WBGene00018735
WBGene00022800	WBGene00022800			WBGene00018585						WBGene00017246	WBGene00019940	WBGene00001757
WBGene00011758	WBGene00011758			WBGene00018593						WBGene00195209	WBGene00002078	WBGene00012293
WBGene00011939	WBGene00011939			WBGene00018604						WBGene00018164	WBGene00003132	WBGene00077761
WBGene00006528	WBGene00006528			WBGene00018622						WBGene00012833	WBGene00000382	WBGene00007488
WBGene00011260	WBGene00011260			WBGene00018657						WBGene00007344	WBGene00002027	WBGene00008944
WBGene00004266	WBGene00004266			WBGene00018689						WBGene00001433	WBGene00022301	WBGene00022501
WBGene00010892	WBGene00010892			WBGene00018701						WBGene00003756	WBGene00011047	WBGene00010269
WBGene00007514	WBGene00007514			WBGene00018703						WBGene00003741	WBGene00021560	WBGene00012141
WBGene00002238	WBGene00002238			WBGene00018710						WBGene00013516	WBGene00001090	WBGene00021751
WBGene00002583	WBGene00002583			WBGene00018714						WBGene00008449	WBGene00008062	WBGene00017717
WBGene00016741	WBGene00016741			WBGene00018717						WBGene00013477	WBGene00001509	WBGene00008583
WBGene00018998	WBGene00018998			WBGene00018719						WBGene00017659	WBGene00021277	WBGene00007997
WBGene00018008	WBGene00018008			WBGene00018735						WBGene00012213	WBGene00007504	WBGene00007744
WBGene00006542	WBGene00006542			WBGene00018740						WBGene00019839	WBGene00001166	WBGene00002184
WBGene00018901	WBGene00018901			WBGene00018743						WBGene00019734	WBGene00004706	WBGene00000512
WBGene00012458	WBGene00012458			WBGene00018757						WBGene00016164	WBGene00016977	WBGene00016427
WBGene00015734	WBGene00015734			WBGene00018758						WBGene00013393	WBGene00011885	WBGene00007131
WBGene00021395	WBGene00021395			WBGene00018778						WBGene00000013	WBGene00011629	WBGene00012763
WBGene00011122	WBGene00011122			WBGene00018786						WBGene00022417	WBGene00014209	WBGene00010965
WBGene00001002	WBGene00001002			WBGene00018788						WBGene00013366	WBGene00019953	WBGene00000829
WBGene00020031	WBGene00020031			WBGene00018806						WBGene00001444	WBGene00007109	WBGene00010962
WBGene00000880	WBGene00000880			WBGene00018808						WBGene00021614	WBGene00004075	WBGene00010964
WBGene00015021	WBGene00015021			WBGene00018812						WBGene00015857	WBGene00002845
WBGene00020840	WBGene00020840			WBGene00018813						WBGene00016505	WBGene00003063
WBGene00018794	WBGene00018794			WBGene00018819						WBGene00023408	WBGene00003367
WBGene00016200	WBGene00016200			WBGene00018833						WBGene00020566	WBGene00007110
WBGene00020822	WBGene00020822			WBGene00018837						WBGene00011484	WBGene00003156
WBGene00001978	WBGene00001978			WBGene00018853						WBGene00009896	WBGene00004355
WBGene00019157	WBGene00019157			WBGene00018857						WBGene00009809	WBGene00012730
WBGene00000381	WBGene00000381			WBGene00018878						WBGene00002111	WBGene00004738
WBGene00021685	WBGene00021685			WBGene00018903						WBGene00020218	WBGene00001874
WBGene00022851	WBGene00022851			WBGene00018925						WBGene00045490	WBGene00011959
WBGene00019836	WBGene00019836			WBGene00018953						WBGene00001702	WBGene00003160
WBGene00020687	WBGene00020687			WBGene00018957						WBGene00015514	WBGene00021595
WBGene00006703	WBGene00006703			WBGene00018974						WBGene00002110	WBGene00001284
WBGene00018017	WBGene00018017			WBGene00018987						WBGene00009328	WBGene00022244
WBGene00004391	WBGene00004391			WBGene00018991						WBGene00001736	WBGene00004755
WBGene00019219	WBGene00019219			WBGene00019060						WBGene00018937	WBGene00022854
WBGene00001337	WBGene00001337			WBGene00019074						WBGene00019236	WBGene00000863
WBGene00014232	WBGene00014232			WBGene00019082						WBGene00009422	WBGene00007588
WBGene00004891	WBGene00004891			WBGene00019087						WBGene00017297	WBGene00185089
WBGene00011239	WBGene00011239			WBGene00019100						WBGene00007149	WBGene00003795
WBGene00006442	WBGene00006442			WBGene00019102						WBGene00019184	WBGene00003793
WBGene00006392	WBGene00006392			WBGene00019132						WBGene00019284	WBGene00011867
WBGene00012094	WBGene00012094			WBGene00019143						WBGene00017082	WBGene00001259
WBGene00003923	WBGene00003923			WBGene00019153						WBGene00017499	WBGene00001979
WBGene00017749	WBGene00017749			WBGene00019188						WBGene00000753	WBGene00008385
WBGene00004422	WBGene00004422			WBGene00019196						WBGene00013406	WBGene00006499
WBGene00022703	WBGene00022703			WBGene00019217						WBGene00010545	WBGene00022114
WBGene00009584	WBGene00009584			WBGene00019240						WBGene00021161	WBGene00000592
WBGene00020068	WBGene00020068			WBGene00019244						WBGene00013029	WBGene00006734
WBGene00001746	WBGene00001746			WBGene00019249						WBGene00013459	WBGene00017300
WBGene00001224	WBGene00001224			WBGene00019250						WBGene00023485	WBGene00016947
WBGene00017217	WBGene00017217			WBGene00019294						WBGene00044374	WBGene00003799
WBGene00010664	WBGene00010664			WBGene00019295						WBGene00016636	WBGene00022785
WBGene00015249	WBGene00015249			WBGene00019317						WBGene00044492	WBGene00020695
WBGene00015915	WBGene00015915			WBGene00019344						WBGene00006048	WBGene00012474
WBGene00022473	WBGene00022473			WBGene00019357						WBGene00018670	WBGene00008400
WBGene00017802	WBGene00017802			WBGene00019365						WBGene00013980	WBGene00003777
WBGene00019747	WBGene00019747			WBGene00019400						WBGene00018340	WBGene00008781
WBGene00010325	WBGene00010325			WBGene00019403						WBGene00021641	WBGene00000889
WBGene00003826	WBGene00003826			WBGene00019427						WBGene00008761	WBGene00013689
WBGene00004824	WBGene00004824			WBGene00019464						WBGene00019092	WBGene00011282
WBGene00009666	WBGene00009666			WBGene00019487						WBGene00019939	WBGene00017088
WBGene00003148	WBGene00003148			WBGene00019490						WBGene00185048	WBGene00016140
WBGene00016249	WBGene00016249			WBGene00019491						WBGene00017020	WBGene00000875
WBGene00017931	WBGene00017931			WBGene00019504						WBGene00017128	WBGene00000874
WBGene00020462	WBGene00020462			WBGene00019513						WBGene00008415	WBGene00001209
WBGene00000833	WBGene00000833			WBGene00019569						WBGene00003169	WBGene00006736
WBGene00001498	WBGene00001498			WBGene00019576						WBGene00015993	WBGene00004980
WBGene00014096	WBGene00014096			WBGene00019578						WBGene00045177	WBGene00019323
WBGene00021868	WBGene00021868			WBGene00019584						WBGene00013181	WBGene00001860
WBGene00007412	WBGene00007412			WBGene00019595						WBGene00010321	WBGene00012936
WBGene00013109	WBGene00013109			WBGene00019606						WBGene00003934	WBGene00006699
WBGene00008338	WBGene00008338			WBGene00019611						WBGene00017599	WBGene00017797
WBGene00009352	WBGene00009352			WBGene00019615						WBGene00020736	WBGene00022399
WBGene00012676	WBGene00012676			WBGene00019628						WBGene00009677	WBGene00003798
WBGene00019121	WBGene00019121			WBGene00019645						WBGene00013882	WBGene00010260
WBGene00022852	WBGene00022852			WBGene00019657						WBGene00022802	WBGene00011507
WBGene00013506	WBGene00013506			WBGene00019665						WBGene00011414	WBGene00006565
WBGene00012192	WBGene00012192			WBGene00019686						WBGene00011095	WBGene00018866
WBGene00013201	WBGene00013201			WBGene00019726						WBGene00004822	WBGene00002637
WBGene00006512	WBGene00006512			WBGene00019729						WBGene00044283	WBGene00001401
WBGene00012550	WBGene00012550			WBGene00019733						WBGene00009791	WBGene00016971
WBGene00003253	WBGene00003253			WBGene00019748						WBGene00011474	WBGene00009284
WBGene00004338	WBGene00004338			WBGene00019794						WBGene00000719	WBGene00004043
WBGene00013532	WBGene00013532			WBGene00019795						WBGene00010007	WBGene00012715
WBGene00015689	WBGene00015689			WBGene00019796						WBGene00016130	WBGene00007258
WBGene00006706	WBGene00006706			WBGene00019799						WBGene00011548	WBGene00021313
WBGene00012879	WBGene00012879			WBGene00019811						WBGene00007511	WBGene00018285
WBGene00003183	WBGene00003183			WBGene00019827						WBGene00011223	WBGene00010037
WBGene00011292	WBGene00011292			WBGene00019833						WBGene00000780	WBGene00007048
WBGene00004297	WBGene00004297			WBGene00019847						WBGene00000632	WBGene00017774
WBGene00019537	WBGene00019537			WBGene00019854						WBGene00018758	WBGene00001526
WBGene00004888	WBGene00004888			WBGene00019862						WBGene00002088	WBGene00002850
WBGene00010709	WBGene00010709			WBGene00019864						WBGene00011757	WBGene00019608
WBGene00019432	WBGene00019432			WBGene00019867						WBGene00012942	WBGene00021667
WBGene00022427	WBGene00022427			WBGene00019871						WBGene00009068	WBGene00016015
WBGene00010476	WBGene00010476			WBGene00019872						WBGene00013858	WBGene00022286
WBGene00001001	WBGene00001001			WBGene00019890						WBGene00019410	WBGene00016317
WBGene00011350	WBGene00011350			WBGene00019905						WBGene00020912	WBGene00006647
WBGene00003397	WBGene00003397			WBGene00019907						WBGene00004119	WBGene00002694
WBGene00017757	WBGene00017757			WBGene00019918						WBGene00045038	WBGene00001748
WBGene00009731	WBGene00009731			WBGene00019924						WBGene00044156	WBGene00009542
WBGene00013983	WBGene00013983			WBGene00019938						WBGene00021491	WBGene00015098
WBGene00006430	WBGene00006430			WBGene00019947						WBGene00012728	WBGene00006888
WBGene00012527	WBGene00012527			WBGene00019953						WBGene00012871	WBGene00021697
WBGene00021562	WBGene00021562			WBGene00019959						WBGene00018293	WBGene00008145
WBGene00002201	WBGene00002201			WBGene00019960						WBGene00016474	WBGene00006307
WBGene00009563	WBGene00009563			WBGene00019962						WBGene00000638	WBGene00016277
WBGene00019217	WBGene00019217			WBGene00019963						WBGene00006586	WBGene00001093
WBGene00022718	WBGene00022718			WBGene00019971						WBGene00044773	WBGene00003389
WBGene00044916	WBGene00044916			WBGene00019987						WBGene00019538	WBGene00010061
WBGene00008405	WBGene00008405			WBGene00019989						WBGene00020421	WBGene00009922
WBGene00045192	WBGene00045192			WBGene00020006						WBGene00007872	WBGene00006840
WBGene00016960	WBGene00016960			WBGene00020018						WBGene00002980	WBGene00003222
WBGene00001262	WBGene00001262			WBGene00020025						WBGene00044476	WBGene00009507
WBGene00012983	WBGene00012983			WBGene00020026						WBGene00000671	WBGene00004167
WBGene00018953	WBGene00018953			WBGene00020027						WBGene00007382	WBGene00015557
WBGene00004409	WBGene00004409			WBGene00020030						WBGene00001449	WBGene00002074
WBGene00008670	WBGene00008670			WBGene00020035						WBGene00012140	WBGene00003421
WBGene00018802	WBGene00018802			WBGene00020050						WBGene00011870	WBGene00018967
WBGene00017316	WBGene00017316			WBGene00020091						WBGene00023407	WBGene00018781
WBGene00004242	WBGene00004242			WBGene00020096						WBGene00012905	WBGene00021698
WBGene00014087	WBGene00014087			WBGene00020104						WBGene00004995	WBGene00003085
WBGene00006976	WBGene00006976			WBGene00020142						WBGene00021875	WBGene00009180
WBGene00011368	WBGene00011368			WBGene00020160						WBGene00194734	WBGene00007092
WBGene00004896	WBGene00004896			WBGene00020163						WBGene00195158	WBGene00006737
WBGene00001813	WBGene00001813			WBGene00020167						WBGene00009995	WBGene00006964
WBGene00000818	WBGene00000818			WBGene00020197						WBGene00022191	WBGene00003801
WBGene00000865	WBGene00000865			WBGene00020199						WBGene00017426	WBGene00013038
WBGene00017916	WBGene00017916			WBGene00020207						WBGene00011072	WBGene00011560
WBGene00010369	WBGene00010369			WBGene00020208						WBGene00007365	WBGene00003159
WBGene00011481	WBGene00011481			WBGene00020214						WBGene00017771	WBGene00001831
WBGene00000840	WBGene00000840			WBGene00020219						WBGene00017789	WBGene00008166
WBGene00007620	WBGene00007620			WBGene00020251						WBGene00020497	WBGene00001110
WBGene00000502	WBGene00000502			WBGene00020259						WBGene00020869	WBGene00015143
WBGene00012964	WBGene00012964			WBGene00020260						WBGene00017076	WBGene00000872
WBGene00021112	WBGene00021112			WBGene00020274						WBGene00019650	WBGene00003504
WBGene00015023	WBGene00015023			WBGene00020290						WBGene00009759	WBGene00004042
WBGene00003858	WBGene00003858			WBGene00020304						WBGene00007517	WBGene00008005
WBGene00000223	WBGene00000223			WBGene00020320						WBGene00235330	WBGene00013270
WBGene00014115	WBGene00014115			WBGene00020322						WBGene00017835	WBGene00012999
WBGene00016398	WBGene00016398			WBGene00020334						WBGene00235300	WBGene00003792
WBGene00003961	WBGene00003961			WBGene00020338						WBGene00005833	WBGene00022739
WBGene00016582	WBGene00016582			WBGene00020366						WBGene00011641	WBGene00008399
WBGene00021359	WBGene00021359			WBGene00020375						WBGene00009226	WBGene00017981
WBGene00001227	WBGene00001227			WBGene00020379						WBGene00019272	WBGene00003796
WBGene00008174	WBGene00008174			WBGene00020427						WBGene00012753	WBGene00001214
WBGene00009451	WBGene00009451			WBGene00020434						WBGene00009805	WBGene00001689
WBGene00001834	WBGene00001834			WBGene00020438						WBGene00000596	WBGene00002994
WBGene00001160	WBGene00001160			WBGene00020462						WBGene00011540	WBGene00019883
WBGene00003230	WBGene00003230			WBGene00020481						WBGene00016638	WBGene00012471
WBGene00007186	WBGene00007186			WBGene00020486						WBGene00008377	WBGene00012543
WBGene00001027	WBGene00001027			WBGene00020496						WBGene00235342	WBGene00004955
WBGene00007972	WBGene00007972			WBGene00020502						WBGene00007996	WBGene00006994
WBGene00004386	WBGene00004386			WBGene00020508						WBGene00018462	WBGene00010281
WBGene00007785	WBGene00007785			WBGene00020540						WBGene00007353	WBGene00000275
WBGene00010502	WBGene00010502			WBGene00020553						WBGene00011941	WBGene00001832
WBGene00020999	WBGene00020999			WBGene00020558						WBGene00008408	WBGene00021676
WBGene00012576	WBGene00012576			WBGene00020562						WBGene00044569	WBGene00000257
WBGene00000817	WBGene00000817			WBGene00020596						WBGene00195143	WBGene00008503
WBGene00010622	WBGene00010622			WBGene00020652						WBGene00017376	WBGene00021555
WBGene00012277	WBGene00012277			WBGene00020673						WBGene00019525	WBGene00008107
WBGene00006540	WBGene00006540			WBGene00020695						WBGene00044578	WBGene00000405
WBGene00019680	WBGene00019680			WBGene00020696						WBGene00003249	WBGene00015817
WBGene00013792	WBGene00013792			WBGene00020706						WBGene00015354	WBGene00004178
WBGene00010842	WBGene00010842			WBGene00020721						WBGene00005642	WBGene00021465
WBGene00021536	WBGene00021536			WBGene00020725						WBGene00010783	WBGene00020463
WBGene00015481	WBGene00015481			WBGene00020726						WBGene00000702	WBGene00004094
WBGene00015524	WBGene00015524			WBGene00020738						WBGene00009475	WBGene00007505
WBGene00015075	WBGene00015075			WBGene00020758						WBGene00000680	WBGene00008848
WBGene00016060	WBGene00016060			WBGene00020761						WBGene00021154	WBGene00002047
WBGene00001234	WBGene00001234			WBGene00020770						WBGene00016027	WBGene00010263
WBGene00003925	WBGene00003925			WBGene00020771						WBGene00011927	WBGene00003218
WBGene00019458	WBGene00019458			WBGene00020777						WBGene00000742	WBGene00017641
WBGene00020103	WBGene00020103			WBGene00020778						WBGene00010019	WBGene00020464
WBGene00002064	WBGene00002064			WBGene00020784						WBGene00010613	WBGene00013729
WBGene00015176	WBGene00015176			WBGene00020812						WBGene00015544	WBGene00000549
WBGene00003418	WBGene00003418			WBGene00020830						WBGene00012761	WBGene00012896
WBGene00017373	WBGene00017373			WBGene00020852						WBGene00016209	WBGene00016024
WBGene00003949	WBGene00003949			WBGene00020901						WBGene00009947	WBGene00001247
WBGene00013167	WBGene00013167			WBGene00020910						WBGene00004931	WBGene00009408
WBGene00002855	WBGene00002855			WBGene00020911						WBGene00017201	WBGene00020183
WBGene00009366	WBGene00009366			WBGene00020919						WBGene00017501	WBGene00019063
WBGene00021088	WBGene00021088			WBGene00020941						WBGene00015894	WBGene00008666
WBGene00001812	WBGene00001812			WBGene00020942						WBGene00016321	WBGene00020605
WBGene00017066	WBGene00017066			WBGene00020948						WBGene00009531	WBGene00000138
WBGene00011195	WBGene00011195			WBGene00021009						WBGene00010812	WBGene00010385
WBGene00022335	WBGene00022335			WBGene00021012						WBGene00044445	WBGene00009641
WBGene00007556	WBGene00007556			WBGene00021035						WBGene00016870	WBGene00005078
WBGene00008480	WBGene00008480			WBGene00021044						WBGene00013161	WBGene00000910
WBGene00018636	WBGene00018636			WBGene00021046						WBGene00003092	WBGene00000296
WBGene00000839	WBGene00000839			WBGene00021047						WBGene00004249	WBGene00013337
WBGene00007169	WBGene00007169			WBGene00021049						WBGene00001387	WBGene00021452
WBGene00008274	WBGene00008274			WBGene00021051						WBGene00012921	WBGene00195169
WBGene00007786	WBGene00007786			WBGene00021055						WBGene00018773	WBGene00016273
WBGene00002061	WBGene00002061			WBGene00021056						WBGene00012593	WBGene00018146
WBGene00009203	WBGene00009203			WBGene00021093						WBGene00003816	WBGene00011772
WBGene00022281	WBGene00022281			WBGene00021132						WBGene00009684	WBGene00044988
WBGene00018806	WBGene00018806			WBGene00021153						WBGene00015184	WBGene00019619
WBGene00015484	WBGene00015484			WBGene00021186						WBGene00017015	WBGene00017012
WBGene00012205	WBGene00012205			WBGene00021206						WBGene00000666	WBGene00021631
WBGene00011111	WBGene00011111			WBGene00021209						WBGene00020616	WBGene00022103
WBGene00009211	WBGene00009211			WBGene00021246						WBGene00022789	WBGene00011726
WBGene00021899	WBGene00021899			WBGene00021282						WBGene00011694	WBGene00001612
WBGene00006391	WBGene00006391			WBGene00021316						WBGene00003469	WBGene00012343
WBGene00009189	WBGene00009189			WBGene00021323						WBGene00000660	WBGene00002632
WBGene00003391	WBGene00003391			WBGene00021324						WBGene00018535	WBGene00015660
WBGene00008764	WBGene00008764			WBGene00021344						WBGene00013865	WBGene00010337
WBGene00012756	WBGene00012756			WBGene00021353						WBGene00007507	WBGene00015400
WBGene00009975	WBGene00009975			WBGene00021366						WBGene00018376	WBGene00010160
WBGene00016790	WBGene00016790			WBGene00021372						WBGene00018221	WBGene00000393
WBGene00011944	WBGene00011944			WBGene00021376						WBGene00011184	WBGene00015896
WBGene00016739	WBGene00016739			WBGene00021402						WBGene00009680	WBGene00002042
WBGene00008417	WBGene00008417			WBGene00021406						WBGene00012144	WBGene00006477
WBGene00016524	WBGene00016524			WBGene00021410						WBGene00007231	WBGene00002252
WBGene00015283	WBGene00015283			WBGene00021446						WBGene00012880	WBGene00003084
WBGene00013250	WBGene00013250			WBGene00021467						WBGene00194785	WBGene00015889
WBGene00013193	WBGene00013193			WBGene00021473						WBGene00045400	WBGene00194926
WBGene00004387	WBGene00004387			WBGene00021474						WBGene00000663	WBGene00010360
WBGene00016045	WBGene00016045			WBGene00021510						WBGene00017364	WBGene00015241
WBGene00010198	WBGene00010198			WBGene00021541						WBGene00019478	WBGene00010659
WBGene00006638	WBGene00006638			WBGene00021546						WBGene00015022	WBGene00016958
WBGene00012697	WBGene00012697			WBGene00021551						WBGene00045473	WBGene00012086
WBGene00019120	WBGene00019120			WBGene00021554						WBGene00010723	WBGene00012172
WBGene00018339	WBGene00018339			WBGene00021564						WBGene00012540	WBGene00000500
WBGene00007024	WBGene00007024			WBGene00021596						WBGene00009216	WBGene00008868
WBGene00001232	WBGene00001232			WBGene00021605						WBGene00000653	WBGene00017440
WBGene00010896	WBGene00010896			WBGene00021607						WBGene00000779	WBGene00017142
WBGene00007168	WBGene00007168			WBGene00021629						WBGene00002268	WBGene00012698
WBGene00020868	WBGene00020868			WBGene00021634						WBGene00013289	WBGene00022814
WBGene00021392	WBGene00021392			WBGene00021654						WBGene00044485	WBGene00011499
WBGene00009499	WBGene00009499			WBGene00021658						WBGene00014174	WBGene00011564
WBGene00014011	WBGene00014011			WBGene00021661						WBGene00000655	WBGene00002152
WBGene00012000	WBGene00012000			WBGene00021664						WBGene00015936	WBGene00003632
WBGene00006829	WBGene00006829			WBGene00021687						WBGene00000735	WBGene00018430
WBGene00004319	WBGene00004319			WBGene00021713						WBGene00006573	WBGene00003056
WBGene00010920	WBGene00010920			WBGene00021730						WBGene00017567	WBGene00020630
WBGene00004014	WBGene00004014			WBGene00021732						WBGene00013295	WBGene00010433
WBGene00004047	WBGene00004047			WBGene00021738						WBGene00017446	WBGene00020486
WBGene00000548	WBGene00000548			WBGene00021747						WBGene00000673	WBGene00013906
WBGene00005007	WBGene00005007			WBGene00021750						WBGene00012255	WBGene00011990
WBGene00017646	WBGene00017646			WBGene00021756						WBGene00020058	WBGene00255375
WBGene00016496	WBGene00016496			WBGene00021763						WBGene00005727	WBGene00001496
WBGene00010537	WBGene00010537			WBGene00021781						WBGene00012261	WBGene00005008
WBGene00006450	WBGene00006450			WBGene00021818						WBGene00018031	WBGene00007170
WBGene00008569	WBGene00008569			WBGene00021853						WBGene00014262	WBGene00044261
WBGene00022019	WBGene00022019			WBGene00021893						WBGene00044062	WBGene00013355
WBGene00008505	WBGene00008505			WBGene00021922						WBGene00001902	WBGene00004199
WBGene00004357	WBGene00004357			WBGene00021926						WBGene00000748	WBGene00001157
WBGene00011410	WBGene00011410			WBGene00021929						WBGene00014084	WBGene00006681
WBGene00013530	WBGene00013530			WBGene00021988						WBGene00013297	WBGene00019938
WBGene00001094	WBGene00001094			WBGene00022014						WBGene00008495	WBGene00009443
WBGene00017733	WBGene00017733			WBGene00022033						WBGene00012434	WBGene00004771
WBGene00022401	WBGene00022401			WBGene00022037						WBGene00010440	WBGene00017596
WBGene00003927	WBGene00003927			WBGene00022043						WBGene00021608	WBGene00003408
WBGene00000419	WBGene00000419			WBGene00022059						WBGene00017218	WBGene00018792
WBGene00010814	WBGene00010814			WBGene00022060						WBGene00016628	WBGene00022842
WBGene00013214	WBGene00013214			WBGene00022073						WBGene00016458	WBGene00013236
WBGene00021466	WBGene00021466			WBGene00022074						WBGene00022798	WBGene00044446
WBGene00011064	WBGene00011064			WBGene00022078						WBGene00004809	WBGene00011050
WBGene00022077	WBGene00022077			WBGene00022124						WBGene00044725	WBGene00000545
WBGene00016313	WBGene00016313			WBGene00022127						WBGene00009578	WBGene00016413
WBGene00015186	WBGene00015186			WBGene00022138						WBGene00021079	WBGene00020398
WBGene00015581	WBGene00015581			WBGene00022139						WBGene00044535	WBGene00013637
WBGene00012059	WBGene00012059			WBGene00022152						WBGene00044350	WBGene00016953
WBGene00003802	WBGene00003802			WBGene00022158						WBGene00045390	WBGene00000210
WBGene00011985	WBGene00011985			WBGene00022167						WBGene00008028	WBGene00003597
WBGene00004701	WBGene00004701			WBGene00022199						WBGene00185005	WBGene00008085
WBGene00012469	WBGene00012469			WBGene00022248						WBGene00022018	WBGene00013860
WBGene00021914	WBGene00021914			WBGene00022251						WBGene00001714	WBGene00018760
WBGene00007189	WBGene00007189			WBGene00022257						WBGene00012821	WBGene00044029
WBGene00010038	WBGene00010038			WBGene00022278						WBGene00000286	WBGene00189949
WBGene00004767	WBGene00004767			WBGene00022291						WBGene00000882	WBGene00007565
WBGene00011527	WBGene00011527			WBGene00022292						WBGene00044009	WBGene00013439
WBGene00007054	WBGene00007054			WBGene00022310						WBGene00185117	WBGene00006728
WBGene00004430	WBGene00004430			WBGene00022369						WBGene00017394	WBGene00008600
WBGene00006385	WBGene00006385			WBGene00022418						WBGene00001065	WBGene00008504
WBGene00016291	WBGene00016291			WBGene00022425						WBGene00018532	WBGene00008020
WBGene00011311	WBGene00011311			WBGene00022455						WBGene00077728	WBGene00015891
WBGene00001412	WBGene00001412			WBGene00022456						WBGene00010680	WBGene00022573
WBGene00020037	WBGene00020037			WBGene00022466						WBGene00001713	WBGene00001816
WBGene00017084	WBGene00017084			WBGene00022471						WBGene00001591	WBGene00019717
WBGene00010139	WBGene00010139			WBGene00022475						WBGene00022822	WBGene00019536
WBGene00011890	WBGene00011890			WBGene00022488						WBGene00010595	WBGene00013416
WBGene00007428	WBGene00007428			WBGene00022501						WBGene00012615	WBGene00008571
WBGene00008173	WBGene00008173			WBGene00022502						WBGene00010001	WBGene00013456
WBGene00004078	WBGene00004078			WBGene00022508						WBGene00022782	WBGene00009137
WBGene00018847	WBGene00018847			WBGene00022512						WBGene00016322	WBGene00194737
WBGene00017830	WBGene00017830			WBGene00022532						WBGene00021850	WBGene00018280
WBGene00007270	WBGene00007270			WBGene00022554						WBGene00013514	WBGene00012717
WBGene00018118	WBGene00018118			WBGene00022569						WBGene00011880	WBGene00008929
WBGene00016154	WBGene00016154			WBGene00022586						WBGene00011872	WBGene00010928
WBGene00020718	WBGene00020718			WBGene00022609						WBGene00003465	WBGene00017464
WBGene00004493	WBGene00004493			WBGene00022613						WBGene00077525	WBGene00015004
WBGene00022090	WBGene00022090			WBGene00022620						WBGene00008335	WBGene00017056
WBGene00010233	WBGene00010233			WBGene00022666						WBGene00017998	WBGene00005653
WBGene00018680	WBGene00018680			WBGene00022667						WBGene00022131	WBGene00006925
WBGene00011747	WBGene00011747			WBGene00022669						WBGene00019203	WBGene00017576
WBGene00004702	WBGene00004702			WBGene00022681						WBGene00010466	WBGene00010108
WBGene00022882	WBGene00022882			WBGene00022712						WBGene00001460	WBGene00006543
WBGene00006044	WBGene00006044			WBGene00022717						WBGene00021894	WBGene00008779
WBGene00000142	WBGene00000142			WBGene00022749						WBGene00012903	WBGene00007425
WBGene00009575	WBGene00009575			WBGene00022769						WBGene00013671	WBGene00016294
WBGene00011988	WBGene00011988			WBGene00022775						WBGene00000656	WBGene00044895
WBGene00016509	WBGene00016509			WBGene00022788						WBGene00015592	WBGene00077576
WBGene00002717	WBGene00002717			WBGene00022801						WBGene00011737	WBGene00001458
WBGene00015235	WBGene00015235			WBGene00022802						WBGene00018258	WBGene00017468
WBGene00000816	WBGene00000816			WBGene00022805						WBGene00000285	WBGene00018472
WBGene00000896	WBGene00000896			WBGene00022835						WBGene00020250	WBGene00000955
WBGene00003073	WBGene00003073			WBGene00022836						WBGene00044263	WBGene00000239
WBGene00010231	WBGene00010231			WBGene00022910						WBGene00018070	WBGene00013024
WBGene00007082	WBGene00007082			WBGene00023036						WBGene00007196	WBGene00007019
WBGene00000774	WBGene00000774			WBGene00023284						WBGene00019280	WBGene00003380
WBGene00001561	WBGene00001561			WBGene00023405						WBGene00009691	WBGene00001050
WBGene00004975	WBGene00004975			WBGene00023418						WBGene00012657	WBGene00011923
WBGene00021191	WBGene00021191			WBGene00023491						WBGene00015905	WBGene00077503
WBGene00021363	WBGene00021363			WBGene00043067						WBGene00044772	WBGene00007750
WBGene00013388	WBGene00013388			WBGene00043097						WBGene00006584	WBGene00006999
WBGene00007227	WBGene00007227			WBGene00044032						WBGene00020311	WBGene00016978
WBGene00021367	WBGene00021367			WBGene00044061						WBGene00021185	WBGene00044212
WBGene00020447	WBGene00020447			WBGene00044071						WBGene00012425	WBGene00001691
WBGene00021929	WBGene00021929			WBGene00044077						WBGene00007684	WBGene00016970
WBGene00004064	WBGene00004064			WBGene00044121						WBGene00009261	WBGene00022484
WBGene00018123	WBGene00018123			WBGene00044188						WBGene00015579	WBGene00013773
WBGene00000423	WBGene00000423			WBGene00044200						WBGene00021030	WBGene00000037
WBGene00004469	WBGene00004469			WBGene00044204						WBGene00001426	WBGene00001193
WBGene00000080	WBGene00000080			WBGene00044325						WBGene00020881	WBGene00006680
WBGene00004028	WBGene00004028			WBGene00044436						WBGene00016805	WBGene00007395
WBGene00022108	WBGene00022108			WBGene00044438						WBGene00019108	WBGene00003234
WBGene00011411	WBGene00011411			WBGene00044439						WBGene00016123	WBGene00011829
WBGene00015310	WBGene00015310			WBGene00044483						WBGene00006578	WBGene00020596
WBGene00019429	WBGene00019429			WBGene00044508						WBGene00008797	WBGene00003876
WBGene00017319	WBGene00017319			WBGene00044689						WBGene00185095	WBGene00013015
WBGene00008852	WBGene00008852			WBGene00044702						WBGene00011310	WBGene00007116
WBGene00007194	WBGene00007194			WBGene00044734						WBGene00017568	WBGene00006712
WBGene00013025	WBGene00013025			WBGene00044808						WBGene00044474	WBGene00015131
WBGene00006808	WBGene00006808			WBGene00044809						WBGene00007886	WBGene00020295
WBGene00009276	WBGene00009276			WBGene00044903						WBGene00009388	WBGene00013692
WBGene00010869	WBGene00010869			WBGene00044949						WBGene00044697	WBGene00008945
WBGene00011962	WBGene00011962			WBGene00044989						WBGene00011498	WBGene00007807
WBGene00011312	WBGene00011312			WBGene00045192						WBGene00018422	WBGene00011578
WBGene00020003	WBGene00020003			WBGene00045245						WBGene00022346	WBGene00007489
WBGene00007922	WBGene00007922			WBGene00045246						WBGene00018619	WBGene00007976
WBGene00016632	WBGene00016632			WBGene00045291						WBGene00006408	WBGene00022270
WBGene00010562	WBGene00010562			WBGene00045366						WBGene00000245	WBGene00011593
WBGene00000201	WBGene00000201			WBGene00045434						WBGene00019846	WBGene00007988
WBGene00020558	WBGene00020558			WBGene00045495						WBGene00004998	WBGene00022420
WBGene00018015	WBGene00018015			WBGene00050944						WBGene00004146	WBGene00016386
WBGene00000765	WBGene00000765			WBGene00077543						WBGene00003590	WBGene00001328
WBGene00022464	WBGene00022464			WBGene00077732						WBGene00014177	WBGene00017323
WBGene00021604				WBGene00164985						WBGene00219296	WBGene00012376
WBGene00001194				WBGene00166243						WBGene00015887	WBGene00004216
WBGene00002240				WBGene00167250						WBGene00011869	WBGene00020379
WBGene00012348				WBGene00172655						WBGene00010573	WBGene00077553
WBGene00019678				WBGene00173957						WBGene00012373	WBGene00219325
WBGene00004437				WBGene00174522						WBGene00016146	WBGene00011893
WBGene00013405				WBGene00189974						WBGene00018117	WBGene00009532
WBGene00011281				WBGene00194686						WBGene00012223	WBGene00044467
WBGene00004125				WBGene00194841						WBGene00012185	WBGene00017001
WBGene00003405				WBGene00194847						WBGene00000677	WBGene00014053
WBGene00020968				WBGene00194884						WBGene00000111	WBGene00004929
WBGene00011994				WBGene00195151						WBGene00012938	WBGene00016138
WBGene00002010				WBGene00195896						WBGene00001924	WBGene00020380
WBGene00003924				WBGene00196871						WBGene00018618	WBGene00004194
WBGene00011016				WBGene00196933						WBGene00012863	WBGene00011108
WBGene00020094				WBGene00198449						WBGene00022492	WBGene00000137
WBGene00006648				WBGene00198576						WBGene00013105	WBGene00000207
WBGene00013725				WBGene00199873						WBGene00000558	WBGene00077782
WBGene00010465				WBGene00200526						WBGene00016893	WBGene00003618
WBGene00010697				WBGene00201346						WBGene00019728	WBGene00044488
WBGene00013724				WBGene00206362						WBGene00045245	WBGene00044404
WBGene00018423				WBGene00206389						WBGene00044043	WBGene00013960
WBGene00007010				WBGene00206491						WBGene00017172	WBGene00021547
WBGene00021826				WBGene00206516						WBGene00003495	WBGene00003739
WBGene00008720				WBGene00219218						WBGene00194641	WBGene00018184
WBGene00007561				WBGene00219313						WBGene00017220	WBGene00019138
WBGene00022705				WBGene00219451						WBGene00013961	WBGene00011058
WBGene00001607				WBGene00219568						WBGene00043097	WBGene00010356
WBGene00001060				WBGene00219593						WBGene00011460	WBGene00018274
WBGene00013997				WBGene00219627						WBGene00009213	WBGene00044400
WBGene00000293				WBGene00219701						WBGene00021087	WBGene00020382
WBGene00013140				WBGene00219729						WBGene00044796	WBGene00013037
WBGene00010560				WBGene00219904						WBGene00219436	WBGene00013976
WBGene00021858				WBGene00220118						WBGene00020052	WBGene00004729
WBGene00022673										WBGene00255522	WBGene00022642
WBGene00001971										WBGene00000681	WBGene00015801
WBGene00010911										WBGene00011839	WBGene00003748
WBGene00012110										WBGene00015910	WBGene00010117
WBGene00015312										WBGene00009818	WBGene00015116
WBGene00006375										WBGene00016655	WBGene00003112
WBGene00022830										WBGene00017666	WBGene00013362
WBGene00013107										WBGene00004979	WBGene00011679
WBGene00020072										WBGene00001906	WBGene00003978
WBGene00018764										WBGene00235268	WBGene00021495
WBGene00004417										WBGene00044395	WBGene00013359
WBGene00006593										WBGene00008603	WBGene00018415
WBGene00012694										WBGene00017490	WBGene00008446
WBGene00006465										WBGene00020846	WBGene00001021
WBGene00009223										WBGene00044499	WBGene00045060
WBGene00000247										WBGene00016463	WBGene00017807
WBGene00022296										WBGene00006980	WBGene00012184
WBGene00003815										WBGene00009688	WBGene00022717
WBGene00007987										WBGene00017197	WBGene00019869
WBGene00015160										WBGene00018260	WBGene00023414
WBGene00003950										WBGene00050941	WBGene00011217
WBGene00016980										WBGene00020760	WBGene00010945
WBGene00021506										WBGene00008492	WBGene00014080
WBGene00002196										WBGene00007450	WBGene00002248
WBGene00011631										WBGene00009280	WBGene00044539
WBGene00015125										WBGene00020620	WBGene00011014
WBGene00006724										WBGene00016099	WBGene00009449
WBGene00018290										WBGene00044666	WBGene00007687
WBGene00011502										WBGene00013819	WBGene00002247
WBGene00004336										WBGene00138711	WBGene00017639
WBGene00017328										WBGene00012032	WBGene00013622
WBGene00011600										WBGene00018965	WBGene00077520
WBGene00011559										WBGene00013148	WBGene00021009
WBGene00001371										WBGene00006764	WBGene00003692
WBGene00000815										WBGene00001914	WBGene00000222
WBGene00007586										WBGene00000974	WBGene00011978
WBGene00007093										WBGene00007458	WBGene00021493
WBGene00018635										WBGene00012257	WBGene00007957
WBGene00004117										WBGene00009554	WBGene00020581
WBGene00045434										WBGene00019361	WBGene00016218
WBGene00003953										WBGene00017445	WBGene00044744
WBGene00001233										WBGene00001879	WBGene00008963
WBGene00000041										WBGene00022162	WBGene00015279
WBGene00011883										WBGene00007765	WBGene00021322
WBGene00010687										WBGene00017471	WBGene00003695
WBGene00002212										WBGene00001389	WBGene00003638
WBGene00009064										WBGene00000930	WBGene00003609
WBGene00013002										WBGene00000730	WBGene00010375
WBGene00010306										WBGene00001694	WBGene00017257
WBGene00009944										WBGene00008865	WBGene00017334
WBGene00020461										WBGene00019563	WBGene00018226
WBGene00022672										WBGene00001425	WBGene00006826
WBGene00015916										WBGene00000710	WBGene00020855
WBGene00004383										WBGene00008553	WBGene00007867
WBGene00012031										WBGene00022751	WBGene00001916
WBGene00019811										WBGene00020617	WBGene00018369
WBGene00008218										WBGene00010597	WBGene00006896
WBGene00012465										WBGene00018605	WBGene00004859
WBGene00016418										WBGene00010183	WBGene00003604
WBGene00019698										WBGene00003464	WBGene00009337
WBGene00013196										WBGene00020397	WBGene00021249
WBGene00002045										WBGene00020471	WBGene00012971
WBGene00000507										WBGene00016660	WBGene00004108
WBGene00021128										WBGene00009526	WBGene00020451
WBGene00020932										WBGene00007288	WBGene00000453
WBGene00007493										WBGene00013894	WBGene00013809
WBGene00008409										WBGene00015393	WBGene00009796
WBGene00015134										WBGene00013394	WBGene00023497
WBGene00011807										WBGene00001761	WBGene00219362
WBGene00021789										WBGene00008233	WBGene00013457
WBGene00013545										WBGene00009692	WBGene00006428
WBGene00004420										WBGene00017813	WBGene00022383
WBGene00006518										WBGene00010225	WBGene00021970
WBGene00011664										WBGene00010515	WBGene00003755
WBGene00004471										WBGene00002183	WBGene00003603
WBGene00012351										WBGene00017500	WBGene00014052
WBGene00012966										WBGene00010972	WBGene00011198
WBGene00018782										WBGene00011895	WBGene00017865
WBGene00006833										WBGene00017745	WBGene00011174
WBGene00018420										WBGene00013228	WBGene00009184
WBGene00000519										WBGene00009436	WBGene00016663
WBGene00020682										WBGene00011977	WBGene00013180
WBGene00000371										WBGene00195051	WBGene00012892
WBGene00013001										WBGene00018692	WBGene00016339
WBGene00008687										WBGene00044608	WBGene00007207
WBGene00009185										WBGene00044949	WBGene00019381
WBGene00001632										WBGene00000694	WBGene00020837
WBGene00003803										WBGene00003893	WBGene00003242
WBGene00009771										WBGene00008125	WBGene00189943
WBGene00021856										WBGene00017270	WBGene00020813
WBGene00044689										WBGene00023422	WBGene00017727
WBGene00013204										WBGene00015172	WBGene00018465
WBGene00013529										WBGene00012886	WBGene00022668
WBGene00006934										WBGene00006949	WBGene00044636
WBGene00077643										WBGene00006416	WBGene00017398
WBGene00009952										WBGene00007827	WBGene00018846
WBGene00007622										WBGene00011185	WBGene00003611
WBGene00004759										WBGene00008341	WBGene00004949
WBGene00004723										WBGene00012968	WBGene00019321
WBGene00006387										WBGene00044078	WBGene00019654
WBGene00014120										WBGene00004986	WBGene00010550
WBGene00014066										WBGene00008554	WBGene00008194
WBGene00021351										WBGene00018026	WBGene00007808
WBGene00007221										WBGene00016329	WBGene00014060
WBGene00009052										WBGene00015259	WBGene00016260
WBGene00011662										WBGene00007649	WBGene00019958
WBGene00008508										WBGene00185014	WBGene00022014
WBGene00003806										WBGene00022055	WBGene00021994
WBGene00004272										WBGene00020156	WBGene00000705
WBGene00021287										WBGene00008572	WBGene00003119
WBGene00015164										WBGene00044024	WBGene00008314
WBGene00017062										WBGene00194886	WBGene00019477
WBGene00022488										WBGene00012760	WBGene00007675
WBGene00009444										WBGene00003061	WBGene00004854
WBGene00008131										WBGene00044520	WBGene00009787
WBGene00022762										WBGene00001724	WBGene00011996
WBGene00006795										WBGene00010539	WBGene00022450
WBGene00020399										WBGene00019315	WBGene00003939
WBGene00019334										WBGene00012919	WBGene00011661
WBGene00044008										WBGene00017484	WBGene00019248
WBGene00017547										WBGene00012216	WBGene00006524
WBGene00009508										WBGene00021094	WBGene00010793
WBGene00007581										WBGene00008476	WBGene00013257
WBGene00022719										WBGene00006947	WBGene00011330
WBGene00000761										WBGene00017618	WBGene00013518
WBGene00022793										WBGene00000720	WBGene00018703
WBGene00006793										WBGene00012710	WBGene00001338
WBGene00021652										WBGene00006890	WBGene00008787
WBGene00017274										WBGene00009620	WBGene00011433
WBGene00009456										WBGene00014013	WBGene00007210
WBGene00021443										WBGene00018723	WBGene00010572
WBGene00001869										WBGene00017679	WBGene00007964
WBGene00010641										WBGene00003966	WBGene00003577
WBGene00014014										WBGene00007312	WBGene00011488
WBGene00016331										WBGene00019647	WBGene00010605
WBGene00018151										WBGene00011110	WBGene00019472
WBGene00009287										WBGene00015560	WBGene00016838
WBGene00022463										WBGene00008621	WBGene00017280
WBGene00018239										WBGene00010541	WBGene00013776
WBGene00013243										WBGene00000641	WBGene00007455
WBGene00014036										WBGene00019384	WBGene00022140
WBGene00015513										WBGene00001717	WBGene00001263
WBGene00017279										WBGene00022002	WBGene00018885
WBGene00007797										WBGene00004370	WBGene00000792
WBGene00003952										WBGene00013736	WBGene00023491
WBGene00017672										WBGene00016097	WBGene00021915
WBGene00001340										WBGene00020563	WBGene00009971
WBGene00021754										WBGene00044605	WBGene00020730
WBGene00004340										WBGene00010661	WBGene00001727
WBGene00005648										WBGene00001564	WBGene00022860
WBGene00004428										WBGene00021675	WBGene00077683
WBGene00015313										WBGene00007398	WBGene00008742
WBGene00021829										WBGene00000743	WBGene00018344
WBGene00017759										WBGene00021817	WBGene00016626
WBGene00022759										WBGene00014016	WBGene00003965
WBGene00010730										WBGene00003424	WBGene00003979
WBGene00009124										WBGene00009806	WBGene00004344
WBGene00017245										WBGene00016404	WBGene00019965
WBGene00014058										WBGene00009269	WBGene00011530
WBGene00010942										WBGene00000723	WBGene00019155
WBGene00013339										WBGene00022236	WBGene00003089
WBGene00008502										WBGene00020722	WBGene00001711
WBGene00004282										WBGene00000684	WBGene00020207
WBGene00008362										WBGene00001703	WBGene00005936
WBGene00014015										WBGene00019260	WBGene00013121
WBGene00000183										WBGene00045249	WBGene00015136
WBGene00011910										WBGene00016801	WBGene00007562
WBGene00009173										WBGene00013984	WBGene00008709
WBGene00015765										WBGene00206354	WBGene00001465
WBGene00004392										WBGene00013046	WBGene00010327
WBGene00004421										WBGene00017444	WBGene00003969
WBGene00000236										WBGene00011374	WBGene00000081
WBGene00004919										WBGene00007178	WBGene00016661
WBGene00014078										WBGene00016266	WBGene00003100
WBGene00008331										WBGene00009529	WBGene00194653
WBGene00003475										WBGene00012429	WBGene00002029
WBGene00022489										WBGene00010632	WBGene00009618
WBGene00013354										WBGene00015633	WBGene00010795
WBGene00001058										WBGene00003457	WBGene00000161
WBGene00018890										WBGene00001235	WBGene00016913
WBGene00018893										WBGene00019658	WBGene00009943
WBGene00000871										WBGene00002264	WBGene00007059
WBGene00004435										WBGene00014104	WBGene00045036
WBGene00016392										WBGene00019604	WBGene00016963
WBGene00020422										WBGene00010488	WBGene00020478
WBGene00020274										WBGene00022820	WBGene00007692
WBGene00001041										WBGene00009241	WBGene00011730
WBGene00020936										WBGene00003473	WBGene00044701
WBGene00000913										WBGene00050936	WBGene00194864
WBGene00008413										WBGene00017925	WBGene00011135
WBGene00012950										WBGene00195045	WBGene00010221
WBGene00021985										WBGene00016022	WBGene00009257
WBGene00018513										WBGene00017841	WBGene00020704
WBGene00020435										WBGene00020475	WBGene00019404
WBGene00044001										WBGene00018694	WBGene00022868
WBGene00003136										WBGene00009056	WBGene00000280
WBGene00009119										WBGene00022747	WBGene00015728
WBGene00012995										WBGene00012256	WBGene00020689
WBGene00008684										WBGene00009042	WBGene00006971
WBGene00022589										WBGene00019607	WBGene00009493
WBGene00017161										WBGene00017267	WBGene00045517
WBGene00005006										WBGene00008204	WBGene00019649
WBGene00005077										WBGene00020690	WBGene00009331
WBGene00005009										WBGene00009682	WBGene00000179
WBGene00021639										WBGene00016918	WBGene00007755
WBGene00004063										WBGene00012780	WBGene00000890
WBGene00012643										WBGene00011727	WBGene00003149
WBGene00008172										WBGene00013489	WBGene00015748
WBGene00004456										WBGene00011244	WBGene00010881
WBGene00019823										WBGene00077582	WBGene00012402
WBGene00000464										WBGene00013391	WBGene00021509
WBGene00000867										WBGene00008444	WBGene00043986
WBGene00009681										WBGene00015202	WBGene00001253
WBGene00015266										WBGene00018253	WBGene00008917
WBGene00004754										WBGene00044500	WBGene00010247
WBGene00004389										WBGene00017379	WBGene00021333
WBGene00018948										WBGene00017060	WBGene00008372
WBGene00007476										WBGene00011288	WBGene00044677
WBGene00003921										WBGene00015781	WBGene00019346
WBGene00010439										WBGene00000176	WBGene00003653
WBGene00004339										WBGene00018726	WBGene00020256
WBGene00020717										WBGene00003759	WBGene00002242
WBGene00011887										WBGene00008390	WBGene00009672
WBGene00001872										WBGene00019780	WBGene00016903
WBGene00022092										WBGene00007567	WBGene00018665
WBGene00018721										WBGene00002265	WBGene00016995
WBGene00021347										WBGene00009851	WBGene00022613
WBGene00018319										WBGene00003888	WBGene00000151
WBGene00019831										WBGene00008745	WBGene00012486
WBGene00011886										WBGene00017691	WBGene00012352
WBGene00021444										WBGene00021839	WBGene00016737
WBGene00004978										WBGene00001892	WBGene00013540
WBGene00021038										WBGene00021893	WBGene00015850
WBGene00009946										WBGene00004141	WBGene00018652
WBGene00012665										WBGene00020120	WBGene00017449
WBGene00009341										WBGene00001770	WBGene00018343
WBGene00022750										WBGene00010133	WBGene00015434
WBGene00001998										WBGene00007183	WBGene00006822
WBGene00009559										WBGene00009927	WBGene00009800
WBGene00004296										WBGene00016898	WBGene00017530
WBGene00001983										WBGene00012556	WBGene00001463
WBGene00004753										WBGene00007836	WBGene00020727
WBGene00022233										WBGene00013220	WBGene00016674
WBGene00010097										WBGene00005646	WBGene00017069
WBGene00020140										WBGene00020040	WBGene00019351
WBGene00018137										WBGene00022440	WBGene00019579
WBGene00003196										WBGene00012585	WBGene00021480
WBGene00013340										WBGene00013352	WBGene00015890
WBGene00006481										WBGene00013013	WBGene00010827
WBGene00006958										WBGene00020887	WBGene00011065
WBGene00004320										WBGene00021797	WBGene00004894
WBGene00006968										WBGene00044035	WBGene00008119
WBGene00020298										WBGene00019438	WBGene00020930
WBGene00021507										WBGene00043534	WBGene00001886
WBGene00002046										WBGene00050896	WBGene00009790
WBGene00020709										WBGene00010050	WBGene00016703
WBGene00004485										WBGene00011252	WBGene00012330
WBGene00019245										WBGene00013712	WBGene00011515
WBGene00007627										WBGene00022379	WBGene00020401
WBGene00014019										WBGene00011317	WBGene00009635
WBGene00021377										WBGene00011551	WBGene00003911
WBGene00003130										WBGene00000599	WBGene00020374
WBGene00003930										WBGene00016667	WBGene00002149
[truncated: 2,811 more rows]

## Sheet: Supplementary Table 2
Supplementary Table 2. IP-MS/MS - CSR-1 IP / control IP
enriched proteins ≥ 2-fold and p-value < 0.05 and at least 3 peptides used for quantification
Ratio of 1000 means protein was not detected in control IP and therefore no P-value can be calculated
		No RNase treated (Barucci et.al 2020)			Rnase treated (this study)
gene id	name	ratio	log2FC	p-value	ratio	log2FC	p-value
P45894	aak-1,PAR2.3	1000	9.96578	na	1000	9.96578	na
Q8I112	aakg-5,CELE_R53.7,R53.7	1000	9.96578	na	1000	9.96578	na
O01541	aars-2,ars-2,F28H1.3	2.39475	1.25988	3.56237e-25	2.68278	1.42373	2.17213e-19
G5EFG4	abcf-2,CELE_T27E9.7,T27E9.7	2.21085	1.1446	5.78595e-27	2.19189	1.13217	7.81285e-22
Q20306	abcf-3,CELE_F42A10.1,F42A10.1	8.17741	3.03164	5.32399e-28	6.51589	2.70396	2.81612e-18
Q21243	acdh-8,CELE_K05F1.3,K05F1.3	2.72142	1.44436	0.000109756	2.53589	1.34249	0.00789155
Q18599	acer-1,C44B7.10,CELE_C44B7.10	3.55401	1.82945	7.65515e-49	3.5478	1.82692	2.02145e-42
H2KY58	ain-2,B0041.2,CELE_B0041.2	1000	9.96578	na	1000	9.96578	na
Q19265	algn-2,CELE_F09E5.2,F09E5.2	2.22204	1.15188	0.00870813	2.23381	1.15951	0.0318342
Q86S57	alh-4,CELE_T05H4.13,T05H4.13	2.39693	1.26119	1.40967e-11	1.96075	0.971405	1.54506e-05
P16356	ama-1,rpb-1,F36A4.7	4.35741	2.12347	4.01229e-20	4.63681	2.21313	5.83638e-16
Q09994	ani-2,K10B2.5	1000	9.96578	na	1000	9.96578	na
Q17883	apc-17,C09H10.7,CELE_C09H10.7	1000	9.96578	na	1000	9.96578	na
Q19102	ard-1,CELE_F01G4.2,F01G4.2	2.09303	1.06559	9.70734e-09	1.71417	0.77751	7.62794e-09
Q94231	arf-1.1,arl-6,F45E4.1	1000	9.96578	na	1000	9.96578	na
O45518	argk-1,CELE_F44G3.2,F44G3.2	3.06229	1.61461	2.98182e-18	2.13337	1.09313	5.64657e-11
Q20758	arl-1,F54C9.10	2.10632	1.07473	2.88238e-06	2.12965	1.09061	2.1684e-06
P53489	arx-2,actc,K07C5.1	2.41673	1.27306	4.1429e-07	1.94603	0.960532	0.00242843
Q9U1R7	arx-3,CELE_Y79H2A.6,Y79H2A.6	3.65282	1.86901	3.88518e-07	2.98337	1.57695	0.00320314
G5EDK1	asc-1,CELE_Y53F4B.15,Y53F4B.15	3.34096	1.74026	2.59833e-06	2.08062	1.05702	0.00119134
G5EFF1	asd-2,let-529,star-2,tag-44,T21G5.5	3.01045	1.58998	3.52147e-06	2.52409	1.33576	1.65034e-07
Q21966	asp-4,CELE_R12H7.2,R12H7.2	3.98537	1.99471	0.00650694	1000	9.96578	na
A0A1T5HUU9	asrA	1000	9.96578	na	1000	9.96578	na
Q17411	B0001.2,CELE_B0001.2	1000	9.96578	na	1000	9.96578	na
Q17425	B0024.10,CELE_B0024.10	4.02025	2.00729	0.0139749	2.32481	1.21711	0.0455833
Q9XTI0	B0250.5	2.66565	1.41449	6.10082e-15	2.33758	1.22502	2.10169e-07
O01442	B0261.7,CELE_B0261.7	2.41149	1.26992	0.0112796	2.348	1.23143	0.0148005
P34255	B0303.3	2.84846	1.51018	1.01324e-21	2.54085	1.34531	6.89559e-22
Q9XU45	B0379.1,CELE_B0379.1	3.08549	1.6255	1.3508e-13	2.74874	1.45877	4.3402e-12
Q17495	B0393.6,CELE_B0393.6	1000	9.96578	na	1000	9.96578	na
Q17532	B0564.7,CELE_B0564.7	2.50186	1.323	0.00584022	2.04554	1.03248	1.02535e-05
Q21593	bcc-1,CELE_M7.3,M7.3	1000	9.96578	na	1000	9.96578	na
Q17542	C01B10.10,CELE_C01B10.10	12.4744	3.6409	0.0170536	21.2002	4.40601	0.0022917
Q93168	C01G10.8,CELE_C01G10.8	4.49119	2.1671	6.19112e-27	5.83516	2.54477	6.61305e-33
Q93169	C01G10.9	2.28336	1.19116	1.7425e-07	2.24731	1.1682	0.00026556
O01477	C06A5.6,CELE_C06A5.6	4.43287	2.14824	0.0063234	3.11077	1.63727	0.0457016
Q95QX5	C07A12.7,CELE_C07A12.7	2.43523	1.28406	1.89145e-05	2.67596	1.42006	0.000137271
H2KYQ3	C12D12.1,CELE_C12D12.1	1000	9.96578	na	1000	9.96578	na
Q18074	C18B2.3,CELE_C18B2.3	2.63484	1.39771	2.8725e-19	2.13785	1.09616	1.52299e-14
Q18244	C27B7.5,CELE_C27B7.5	5.472	2.45207	9.04337e-09	4.51964	2.17621	5.67308e-07
Q93345	C36B1.11,CELE_C36B1.11	1000	9.96578	na	1000	9.96578	na
O01504	C37A2.7	4.81949	2.26888	1.06742e-10	7.89401	2.98076	1.10165e-11
Q95QR7	C39D10.8,CELE_C39D10.8	2.69425	1.42988	9.02538e-06	2.1164	1.08161	0.000289994
Q09278	C45G9.5	2.90128	1.53669	1.15459e-05	3.30906	1.72642	8.99724e-07
Q09289	C56G2.7	3.13453	1.64825	1.73817e-08	3.17715	1.66773	3.3889e-08
Q93249	cab-1,C23H4.1	1000	9.96578	na	1000	9.96578	na
Q95YA9	cas-1,CELE_F41G4.2,F41G4.2	2.31034	1.20811	0.0194946	3.06185	1.6144	0.0137915
G5EE12	cash-1,CELE_K07C5.8,K07C5.8	1000	9.96578	na	1000	9.96578	na
P41988	cct-1,tcp-1,T05C12.7	2.29029	1.19553	8.32892e-18	2.65625	1.40939	2.27999e-22
P47207	cct-2,cctb,T21B10.7	2.65741	1.41002	7.70503e-24	2.36997	1.24487	2.09632e-14
Q9N4J8	cct-3,F54A3.3	2.13071	1.09133	5.45623e-09	2.25442	1.17276	7.23133e-11
P47208	cct-4,K01C8.10	2.48576	1.31369	1.06722e-12	2.81964	1.49551	1.9253e-10
P46550	cct-6,F01F1.8	2.60743	1.38263	7.91726e-14	3.33569	1.73798	2.55002e-21
Q9N358	cct-8,Y55F3AR.3	2.12512	1.08755	1.25443e-14	2.65314	1.4077	1.67584e-17
P54811	cdc-48.1,C06A1.1	2.11441	1.08025	9.52196e-09	2.65117	1.40663	7.92758e-18
P34556	cdk-1,ncc-1,T05G5.3	3.3737	1.75433	1.17079e-06	3.26341	1.70638	6.84696e-08
Q18946	CELE_D1054.8,D1054.8	2.94777	1.55962	0.00260908	2.18073	1.12481	0.0270291
A5Z2T6	CELE_D1081.7,D1081.7	4.89174	2.29035	3.02958e-06	4.44076	2.15081	2.13081e-09
Q93410	CELE_D2005.4,D2005.4	2.37074	1.24534	0.0109487	2.24648	1.16767	9.43744e-05
P90788	CELE_D2030.2,D2030.2	2.5116	1.32861	2.43878e-14	2.20399	1.14012	1.04782e-11
Q19014	CELE_DH11.2,DH11.2	1000	9.96578	na	1000	9.96578	na
G5EDV0	CELE_E01G4.6,E01G4.6	2.59851	1.37768	4.28066e-13	3.25858	1.70425	1.78771e-17
Q19174	CELE_F07H5.10,F07H5.10	1000	9.96578	na	1000	9.96578	na
Q22945	CELE_F08F3.4,F08F3.4	2.93662	1.55416	4.20304e-06	1.97611	0.982662	0.000146055
G5EE62	CELE_F12F6.1,F12F6.1	1000	9.96578	na	1000	9.96578	na
O62173	CELE_F15D3.6,F15D3.6	1000	9.96578	na	1000	9.96578	na
O76592	CELE_F16G10.7,F16G10.7	1000	9.96578	na	1000	9.96578	na
O45394	CELE_F22B8.7,F22B8.7	2.14621	1.10179	1.31197e-11	2.51231	1.32901	3.56682e-11
Q19803	CELE_F26A1.13,F26A1.13	1000	9.96578	na	1000	9.96578	na
P91287	CELE_F27C1.1,F27C1.1	1000	9.96578	na	1000	9.96578	na
I2HA91	CELE_F28C6.8,F28C6.8	4.30539	2.10614	0.0148563	4.42285	2.14498	0.00665153
H2KZK4	CELE_F36D4.5,F36D4.5	1000	9.96578	na	1000	9.96578	na
Q20644	CELE_F52B5.3,F52B5.3	7.30823	2.86952	2.29079e-08	6.48403	2.69689	0.0038386
Q20697	CELE_F53B1.4,F53B1.4	3.28834	1.71736	8.67772e-19	2.60416	1.38082	1.14408e-08
Q95QF1	CELE_F53B2.8,F53B2.8	1000	9.96578	na	1000	9.96578	na
Q20720	CELE_F53F4.11,F53F4.11	2.47618	1.30811	4.14777e-11	2.06308	1.0448	1.07573e-07
O62261	CELE_F53F8.4,F53F8.4	2.35355	1.23484	0.0305534	2.06811	1.04832	0.0330342
U4PC34	CELE_F56A11.5,F56A11.5	6.77691	2.76063	9.43742e-24	5.71293	2.51423	1.13793e-18
P91357	CELE_F59A3.12,F59A3.12	2.86989	1.52099	0.0340447	3.27865	1.7131	0.00648504
H2L0A8	CELE_H05C05.1,H05C05.1	2.6069	1.38234	0.000127363	2.9111	1.54156	0.000300401
V6CJY2	CELE_H34C03.2,H34C03.2	3.94951	1.98167	5.75572e-27	3.98259	1.99371	6.41081e-23
Q21080	CELE_K01C8.1,K01C8.1	2.2021	1.13888	8.36218e-05	1.9829	0.987611	0.015518
Q21234	CELE_K04G7.1,K04G7.1	1000	9.96578	na	1000	9.96578	na
Q7YXB7	CELE_M01F1.8,M01F1.8	1000	9.96578	na	1000	9.96578	na
Q21711	CELE_R04D3.4,R04D3.4	1000	9.96578	na	1000	9.96578	na
G5EBX2	CELE_R07B7.2,R07B7.2	1000	9.96578	na	1000	9.96578	na
Q21871	CELE_R09E10.6,R09E10.6	1000	9.96578	na	1000	9.96578	na
Q22020	CELE_R53.5,R53.5	3.03307	1.60078	1.83495e-23	2.16344	1.11333	1.17642e-06
Q8MXH3	CELE_T09A12.5,T09A12.5	1000	9.96578	na	1000	9.96578	na
Q22449	CELE_T13A10.1,T13A10.1	1000	9.96578	na	1000	9.96578	na
P91482	CELE_T20F5.6,T20F5.6	2.61138	1.38481	1.06363e-08	2.52629	1.33702	7.80189e-08
H2KZS2	CELE_T23E7.2,T23E7.2	2.61186	1.38508	1.4586e-27	3.18351	1.67062	2.64639e-31
P91494	CELE_T23H2.3,T23H2.3	3.47185	1.79571	9.73802e-09	2.67076	1.41725	1.78349e-06
O44749	CELE_W03G9.2,W03G9.2	1000	9.96578	na	1000	9.96578	na
F5GUH2	CELE_W05B5.1,W05B5.1	3.38884	1.76079	0.00100146	3.26731	1.7081	0.00267914
H2KZ41	CELE_Y110A7A.15,Y110A7A.15	3.8026	1.92699	3.49129e-08	2.44799	1.2916	2.16393e-06
Q9U2U4	CELE_Y116A8C.43,Y116A8C.43	1000	9.96578	na	1000	9.96578	na
Q9XWR3	CELE_Y11D7A.9,Y11D7A.9	7.69756	2.9444	0.0124793	6.31965	2.65984	0.0268863
Q9N478	CELE_Y23H5B.6,Y23H5B.6	2.4501	1.29284	0.00177471	1.74451	0.802822	0.0081854
Q9BKU5	CELE_Y37E3.8,Y37E3.8	2.7066	1.43648	0.000919038	2.53732	1.34331	0.0179683
Q9U2M9	CELE_Y37H9A.1,Y37H9A.1	1000	9.96578	na	1000	9.96578	na
Q9N412	CELE_Y39A3CL.1,Y39A3CL.1	1000	9.96578	na	1000	9.96578	na
Q9U2K2	CELE_Y39E4B.10,Y39E4B.10	1000	9.96578	na	1000	9.96578	na
Q8WSN7	CELE_Y41D4B.4,Y41D4B.4	1000	9.96578	na	1000	9.96578	na
Q8WTM0	CELE_Y45G5AL.1,Y45G5AL.1	2.70225	1.43416	0.000163584	2.0098	1.00705	0.0114379
Q9GUI6	CELE_Y45G5AM.2,Y45G5AM.2	1000	9.96578	na	1000	9.96578	na
Q8I0Z3	CELE_Y48E1C.4,Y48E1C.4	1000	9.96578	na	1000	9.96578	na
Q9XWF1	CELE_Y52B11A.3,Y52B11A.3	1000	9.96578	na	1000	9.96578	na
G5EDV7	CELE_Y53H1B.2,Y53H1B.2	1000	9.96578	na	1000	9.96578	na
A0A1I6CMC9	CELE_Y55F3BR.6,Y55F3BR.6	1000	9.96578	na	1000	9.96578	na
Q9N4E1	CELE_Y73C8B.2,Y73C8B.2	4.46316	2.15806	4.8001e-05	3.46622	1.79336	3.56864e-05
Q9NA40	CELE_Y73F8A.5,Y73F8A.5	1000	9.96578	na	1000	9.96578	na
Q9XW73	CELE_Y75B8A.8,Y75B8A.8	1000	9.96578	na	1000	9.96578	na
Q9XWC9	CELE_Y76A2B.5,Y76A2B.5	2.51237	1.32905	0.0063234	4.18724	2.066	0.00135229
U4PEX3	CELE_Y77E11A.7,Y77E11A.7	3.27358	1.71087	2.69829e-06	2.65036	1.40619	5.91936e-05
Q9XVZ2	CELE_Y7A5A.1,Y7A5A.1	2.70535	1.43582	1.93984e-08	2.51915	1.33293	2.54529e-07
C9IY21	CELE_ZK1058.9,ZK1058.9	2.1193	1.08359	4.71784e-07	2.55715	1.35454	8.19898e-05
O62512	CELE_ZK550.3,ZK550.3	4.89563	2.29149	1.59992e-09	5.43436	2.44211	3.08652e-07
P91027	chdp-1,C10G11.7,CELE_C10G11.7	5.30434	2.40717	1.08112e-15	6.58361	2.71888	1.41593e-15
G5ECY6	chn-1,1G758,CELE_T09B4.10,T09B4.10	1000	9.96578	na	1000	9.96578	na
P34466	clu-1,F55H2.6	3.22141	1.68769	6.74164e-53	2.87878	1.52546	7.92486e-46
Q9N4H7	copa-1,CELE_Y71F9AL.17,Y71F9AL.17	2.88009	1.52611	1.29334e-12	3.75949	1.91054	3.71005e-24
Q09236	copd-1,C13B9.3	2.83654	1.50413	2.06367e-16	2.42099	1.2756	9.02463e-10
O45734	cpl-1,CELE_T03E6.7,T03E6.7	3.01719	1.5932	2.00867e-11	2.54801	1.34937	7.5212e-10
Q95PY8	cpsf-3,CELE_Y67H2A.1,Y67H2A.1	1000	9.96578	na	1000	9.96578	na
G5EBX6	crn-3,C14A4.4,CELE_C14A4.4	1000	9.96578	na	1000	9.96578	na
Q9GS00	csn-1,Y59A8A.1	3.54698	1.82659	0.0101236	2.41036	1.26925	0.000114282
P91001	csn-5,B0547.1	3.43133	1.77877	3.51761e-05	3.04754	1.60764	0.0209445
H2KZD5	csr-1,CELE_F20D12.1,F20D12.1	83.3506	6.38112	2.36107e-101	52.8608	5.72413	6.96222e-79
Q23571	dbt-1,ZK669.4	4.01945	2.007	9.97799e-34	2.83344	1.50255	2.76006e-18
G5ED89	dcp-66,C26C6.5,CELE_C26C6.5	1000	9.96578	na	1000	9.96578	na
Q22308	ddx-19,CELE_T07D4.4,T07D4.4	2.03738	1.02672	1.2171e-19	1.83968	0.879456	1.95017e-11
A0A163UT65	dhs-11,CELE_Y39A1A.11,Y39A1A.11	1000	9.96578	na	1000	9.96578	na
Q18639	dhs-18,C45B11.3,CELE_C45B11.3	3.58705	1.8428	0.0279827	2.45756	1.29723	0.0180814
Q22392	dhs-19,CELE_T11F9.11,T11F9.11	2.13338	1.09314	2.25788e-05	2.42557	1.27833	7.72971e-06
Q9U1Y6	dhs-24,CELE_Y60A3A.10,Y60A3A.10	2.95267	1.56202	0.0209011	3.00397	1.58687	0.023827
A5JYX5	dhs-3,CELE_T02E1.5,T02E1.5	2.37596	1.24851	4.9724e-13	2.00741	1.00534	9.45676e-09
Q9TXI3	did-2,CELE_F23C8.6,F23C8.6	2.99874	1.58436	0.0114956	2.46937	1.30414	0.0326882
Q17632	dis-3,C04G2.6	2.18187	1.12557	4.42901e-06	1.93528	0.952543	0.0268094
Q09568	disl-2,F48E8.6	1000	9.96578	na	1000	9.96578	na
Q21625	div-1,R01H10.1/R01H10.2/Y70G10A.4	1000	9.96578	na	1000	9.96578	na
Q9XUJ7	dkf-1,W09C5.5	1000	9.96578	na	1000	9.96578	na
Q8TA83	dnj-10,F22B7.5	2.53813	1.34377	0.000356081	1.99653	0.997493	0.0216996
O45502	dnj-12,CELE_F39B2.10,F39B2.10	6.5987	2.72218	3.02255e-36	5.13888	2.36145	1.5009e-22
O16303	dnj-19,CELE_T05C3.5,T05C3.5	9.58986	3.26151	2.01089e-23	7.23764	2.85552	1.46464e-21
G5EGE9	dpy-26,C25G4.5	1000	9.96578	na	1000	9.96578	na
Q9U2M1	dpy-28,Y39A1B.3	1000	9.96578	na	1000	9.96578	na
Q93413	drh-3,CELE_D2005.5,D2005.5	3.72627	1.89773	7.12054e-09	2.82397	1.49772	2.39952e-05
Q03577	drs-1,B0464.1	2.18604	1.12832	2.31684e-15	2.12054	1.08443	1.8774e-13
G5EF11	efl-1,CELE_Y102A5C.18,Y102A5C.18	1000	9.96578	na	1000	9.96578	na
Q18967	eif-3.F,D2013.7	2.30862	1.20703	9.39934e-05	2.49197	1.31729	0.001064
Q9N595	elpc-1,CELE_Y110A7A.16,Y110A7A.16	2.04631	1.03302	0.000177698	1.88362	0.913504	0.0286343
Q23651	elpc-3,ZK863.3	2.41985	1.27492	0.00264716	3.09814	1.6314	8.92213e-06
O62431	ers-1,qrs-5,Y41E3.4	2.15879	1.11022	3.89905e-12	1.87352	0.905749	4.02586e-06
P49583	F08C6.2	3.64478	1.86583	3.97001e-11	4.49137	2.16715	1.50899e-12
Q19264	F09E5.3	2.50675	1.32582	1.1033e-06	1.86356	0.898064	4.30603e-05
P90829	F10C2.4	2.91969	1.54582	0.00811417	1000	9.96578	na
P55326	F13E6.1	17.6651	4.14283	3.44476e-15	12.8088	3.67906	2.64883e-05
P34423	F44B9.2	4.39962	2.13738	0.000143138	4.9657	2.312	0.0294789
P34429	F44B9.8	3.49738	1.80628	9.52931e-06	3.21223	1.68357	0.000363688
Q20683	F52H3.5	2.2881	1.19415	2.40644e-05	2.0574	1.04082	5.71894e-05
Q93761	F53C11.3	2.55193	1.35159	6.52881e-12	2.23731	1.16176	2.85394e-07
P34445	F54C8.7	3.77131	1.91507	0.00172933	3.49876	1.80684	0.00809006
Q09544	F58F12.1	2.06161	1.04377	0.00450609	2.37104	1.24552	0.00174123
P34382	far-1,F02A9.2	3.46485	1.79279	1.35354e-06	3.39427	1.7631	5.91936e-05
P34383	far-2,F02A9.3	4.03726	2.01338	1.65199e-05	4.74012	2.24492	1.20193e-06
O16541	fbxc-50,C17F4.5,CELE_C17F4.5	1000	9.96578	na	1000	9.96578	na
G5EBW5	fecl-1,CELE_K07G5.6,K07G5.6	2.38703	1.25522	1.2016e-11	2.24466	1.16649	3.29491e-06
Q19713	frs-2,F22B5.9	2.93805	1.55486	8.4788e-18	3.13296	1.64753	1.71771e-12
G5EEL7	fut-4,CELE_K12H6.3,K12H6.3	1000	9.96578	na	1000	9.96578	na
Q93873	gas-1,K09A9.5	1000	9.96578	na	1000	9.96578	na
Q19130	gfat-1,CELE_F07A11.2,F07A11.2	3.05501	1.61118	1.0298e-06	2.84853	1.51022	3.5873e-08
Q18488	gipc-1,C35D10.2,CELE_C35D10.2	9.35294	3.22542	0.0123215	7.59334	2.92474	0.0263516
Q17339	gld-1,T23G11.3	2.61871	1.38886	5.4101e-12	2.09735	1.06857	5.67479e-07
O17087	gld-2,ZC308.1	5.0445	2.33471	0.000214419	2.96473	1.5679	0.0385844
P34689	glh-1,T21G5.3	2.83054	1.50108	7.82822e-17	2.61662	1.38771	2.05606e-14
Q966L9	glh-2,C55B7.1	3.11851	1.64086	4.83297e-13	3.57419	1.83762	3.23214e-08
O76743	glh-4,T12F5.3	2.25109	1.17062	7.85078e-08	2.89824	1.53518	9.41867e-11
O45293	gly-8,Y66A7A.6	5.29789	2.40542	6.48336e-12	4.3432	2.11876	8.96776e-11
P34517	gpdh-2,K11H3.1	2.93656	1.55413	4.18828e-18	2.16632	1.11525	2.19306e-07
Q09646	ham-3,CELE_ZK1128.5,ZK1128.5	1000	9.96578	na	1000	9.96578	na
Q17796	hgrs-1,C07G1.5,CELE_C07G1.5	2.2908	1.19585	1.0272e-07	2.28524	1.19234	0.000494673
Q21952	him-10,R12B2.4	1000	9.96578	na	1000	9.96578	na
G5EE04	hip-1,CELE_T12D8.8,T12D8.8	2.09108	1.06425	1.10235e-09	2.20136	1.13839	4.53631e-08
Q9NLD1	hrp-2,CELE_F58D5.1,F58D5.1	2.51045	1.32795	2.55753e-15	2.58647	1.37098	2.73374e-18
P09446	hsp-1,hsp70a,F26D10.3	2.71168	1.43918	5.44178e-43	2.61945	1.38926	1.0947e-34
Q2L6Y6	hsp-75,CELE_R151.7,R151.7	2.67819	1.42126	4.70688e-31	1.97859	0.984474	1.51165e-20
Q9XU15	hxk-2,CELE_H25P06.1,H25P06.1	3.26488	1.70703	6.75976e-05	2.51169	1.32866	0.0473876
Q93714	idha-1,F43G9.1	2.39813	1.26191	1.35846e-18	2.44735	1.29122	1.89686e-18
Q09501	ifp-1,C43C3.1	2.65296	1.4076	0.00239483	0.646128	-0.630107	0.0309453
G5EDX1	kal-1,CELE_K03D10.1,K03D10.1	1000	9.96578	na	1000	9.96578	na
Q9N2X3	kbp-4,CELE_Y92C3B.1,Y92C3B.1	1000	9.96578	na	1000	9.96578	na
P42168	kin-19,C03C10.1	2.43056	1.28129	4.34239e-05	1.72104	0.783283	0.0148851
Q18758	klo-1,C50F7.10,CELE_C50F7.10	6.29372	2.65391	0.0128221	15.6375	3.96694	0.0238837
P34278	knl-1,C02F5.1	6.27615	2.64988	9.06835e-10	2.88766	1.5299	0.0347246
O76406	knl-3,CELE_T10B5.6,T10B5.6	1000	9.96578	na	1000	9.96578	na
O44565	lam-1,CELE_W03F8.5,W03F8.5	1000	9.96578	na	1000	9.96578	na
O61967	let-413,F26D11.11	2.44387	1.28917	0.000278535	2.74055	1.45447	3.51622e-07
Q18038	let-716,C16A3.3,CELE_C16A3.3	2.77017	1.46997	1.71677e-33	3.43499	1.7803	4.07972e-45
Q11190	let-721,C05D11.12	2.211	1.1447	0.000932266	3.29627	1.72083	0.000289019
O61907	lin-40,CELE_T27C4.4,T27C4.4	2.8553	1.51364	0.00712574	1000	9.96578	na
P90916	lin-53,rba-2,K07A1.12	3.07829	1.62213	9.25355e-14	2.90451	1.5383	1.45185e-11
Q9NAG4	mac-1,CELE_Y48C3A.7,Y48C3A.7	2.18424	1.12713	1.77052e-10	2.39128	1.25778	2.0892e-09
Q9N593	mat-1,apc-3,cdc-27,pod-5,Y110A7A.17	1000	9.96578	na	1000	9.96578	na
O18191	mat-2,apc-1,evl-22,pod-3,W10C6.1	1000	9.96578	na	1000	9.96578	na
O45430	mccc-1,CELE_F32B6.2,F32B6.2	2.2868	1.19333	8.56508e-06	2.58914	1.37247	4.41689e-12
Q9XXI9	mcm-2,CELE_Y17G7B.5,Y17G7B.5	2.9466	1.55905	0.00182814	2.17433	1.12057	0.0248551
Q95XQ8	mcm-4,let-358,lin-6,Y39G10AR.14	2.68702	1.42601	2.5892e-22	3.29797	1.72158	1.12016e-17
O16297	mcm-7,CELE_F32D1.10,F32D1.10	4.12679	2.04502	7.12837e-22	2.63644	1.39859	9.07369e-06
P12456	mec-7,ZK154.3	3.29916	1.7221	6.81352e-09	4.76518	2.25253	4.3951e-08
P34544	met-2,R05D3.11	1000	9.96578	na	1000	9.96578	na
Q09582	metr-1,R03D7.1	3.63028	1.86008	3.20256e-18	2.97037	1.57064	7.52478e-10
Q95QL2	mrpl-13,CELE_F13G3.11,F13G3.11	1000	9.96578	na	1000	9.96578	na
O02220	mrpl-34,C25A1.13,CELE_C25A1.13	3.67597	1.87812	0.00030695	3.37327	1.75415	0.0017699
Q9BL86	mrpl-38,CELE_Y34D9A.1,Y34D9A.1	1000	9.96578	na	1000	9.96578	na
G5EFS2	msi-1,CELE_R10E9.1,R10E9.1	3.49385	1.80482	5.13268e-05	3.33899	1.73941	0.00915837
Q20129	mus-101,CELE_F37D6.1,F37D6.1	1000	9.96578	na	1000	9.96578	na
O16398	nhr-156,C17E7.1,CELE_C17E7.1	1000	9.96578	na	1000	9.96578	na
O45012	nol-5,CELE_W01B11.3,W01B11.3	2.07991	1.05652	2.10298e-27	1.45435	0.540379	1.86086e-07
Q9N4A7	npp-20,Y77E11A.13	2.48906	1.3156	0.00539028	3.19409	1.67541	4.40922e-06
Q94392	nsf-1,H15N14.2	2.74873	1.45876	1.32205e-21	2.26231	1.1778	7.1252e-14
W6RTE4	ntl-4,C49H3.5,CELE_C49H3.5	2.31977	1.21398	1.35009e-11	2.48244	1.31176	1.79726e-08
Q9N4Y8	nuo-5,CELE_Y45G12B.1,Y45G12B.1	3.49364	1.80473	4.44849e-26	2.82829	1.49993	7.51667e-16
G5EC86	oma-1,moe-1,C09G9.6	4.32038	2.11116	0.0159367	1000	9.96578	na
Q95NU5	ooc-5,C18E9.11	1000	9.96578	na	1000	9.96578	na
Q9U302	pab-1,CELE_Y106G6H.2,Y106G6H.2	3.27778	1.71272	2.03887e-34	3.11174	1.63772	3.30305e-26
Q95008	pas-5,F25H2.9	2.88532	1.52873	4.80529e-18	2.61579	1.38725	3.80684e-11
Q9TZC4	pat-4,C29F9.7	3.16916	1.6641	0.00783004	9.10335	3.1864	0.0130934
Q09345	pcf-11,R144.2	1000	9.96578	na	1000	9.96578	na
Q9XUS3	pdr-1,CELE_K08E3.7,K08E3.7	1000	9.96578	na	1000	9.96578	na
Q9XW16	pfn-1,Y18D10A.20	7.20623	2.84924	1.99394e-22	5.3728	2.42567	3.41946e-22
Q20025	pfn-2,F35C8.6	3.42068	1.77428	2.22076e-08	3.47216	1.79583	0.00101507
Q9TZQ3	pgl-1,ZK381.4	3.19686	1.67666	2.63235e-30	2.53048	1.33941	3.56852e-25
P34266	pgl-2,B0523.3	1000	9.96578	na	1000	9.96578	na
G5EBV6	pgl-3,C18G1.4,CELE_C18G1.4	2.77285	1.47137	3.15066e-21	2.60648	1.3821	9.15729e-20
A8WHP8	plin-1,mdt-28,CELE_W01A8.1,W01A8.1	3.01987	1.59449	1.07096e-11	3.04406	1.606	1.81752e-11
Q20845	plk-3,plc2,F55G1.8	1000	9.96578	na	1000	9.96578	na
H2L0M0	pod-2,CELE_W09B6.1,W09B6.1	2.13055	1.09123	1.86199e-60	2.15538	1.10795	1.77532e-52
Q19196	pole-2,F08B4.5	1000	9.96578	na	1000	9.96578	na
Q86NJ8	ppw-1,C18E3.7,CELE_C18E3.7	2.90569	1.53888	0.00201018	4.04395	2.01577	0.000256168
G2HK03	pqn-87,CELE_Y57A10A.18,Y57A10A.18	2.08091	1.05722	0.00601569	2.2054	1.14104	0.002537
P90786	prg-1,CELE_D2030.6,D2030.6	8.60538	3.10524	3.65118e-22	3.39144	1.7619	7.06708e-11
Q93339	prp-4,C36B1.5,CELE_C36B1.5	1000	9.96578	na	1000	9.96578	na
Q18028	prx-3,C15H9.8,CELE_C15H9.8	1000	9.96578	na	1000	9.96578	na
O17732	pyc-1,D2023.2	3.93911	1.97787	6.43237e-83	3.9609	1.98583	2.87924e-70
Q18990	pyr-1,D2085.1	2.89873	1.53542	9.18373e-52	2.89266	1.5324	4.38842e-49
Q8MXS1	rab-18,Y92C3B.3	2.8158	1.49354	7.23038e-12	3.37872	1.75648	2.47292e-09
P34213	rab-6.1,F59B2.7	2.5894	1.37262	0.00546582	3.1885	1.67288	0.0101089
Q21215	rack-1,K04D7.1	4.94104	2.30481	1.28225e-30	6.24883	2.64359	3.38155e-30
Q23451	rad-23,CELE_ZK20.3,ZK20.3	5.14018	2.36182	1.33396e-13	5.91092	2.56338	7.32359e-13
Q95Y41	rcor-1,CELE_Y74C9A.4,Y74C9A.4	1000	9.96578	na	1000	9.96578	na
O44175	rfc-2,CELE_F58F6.4,F58F6.4	3.08583	1.62566	0.000573186	3.01125	1.59036	0.00119329
P91913	rla-1,rpa-1,Y37E3.7	4.45528	2.15551	7.93732e-08	6.65371	2.73416	6.69516e-14
Q9U1X9	rla-2,CELE_Y62E10A.1,Y62E10A.1	5.01177	2.32532	1.1685e-11	6.57478	2.71694	2.90763e-10
G5ECC3	rme-1,CELE_W06H8.1,W06H8.1	3.91238	1.96805	6.28385e-46	3.9397	1.97809	1.6888e-44
O01482	rnf-1,C06A5.9,CELE_C06A5.9	1000	9.96578	na	1000	9.96578	na
Q21323	rnp-3,CELE_K08D10.3,K08D10.3	1000	9.96578	na	1000	9.96578	na
Q27274	rop-1,C12D8.11	3.53717	1.8226	8.91028e-07	2.76849	1.4691	0.000152703
Q93572	rpa-0,F25H2.10	4.43945	2.15038	1.69818e-34	5.66363	2.50173	7.03377e-33
P34476	rpac-19,F58A4.9	7.34219	2.87621	1.1685e-11	7.51185	2.90917	3.48904e-11
Q9UAY9	rpac-40,CELE_H43I07.2,H43I07.2	4.34329	2.11879	2.04426e-09	5.81547	2.5399	8.32183e-10
Q9XVH6	rpb-11,W01G7.3	1000	9.96578	na	1000	9.96578	na
Q10578	rpb-2,C26E6.4	5.04428	2.33465	8.5943e-17	5.0245	2.32898	1.15663e-15
Q93338	rpb-3,C36B1.3,CELE_C36B1.3	10.2411	3.3563	2.23415e-05	7.27142	2.86224	0.000107588
Q27492	rpc-2,CELE_F09F7.3,F09F7.3	6.41571	2.68161	7.66052e-18	4.28653	2.09981	1.09134e-07
Q09533	rpl-10,F10B5.1	2.5454	1.34789	7.19627e-12	3.81024	1.92988	2.0892e-09
Q9N4I4	rpl-10a,rpl-1,Y71F9AL.13	2.77785	1.47397	1.61307e-11	4.18663	2.06579	2.58136e-15
P61866	rpl-12,JC8.3	3.24255	1.69713	6.27884e-08	8.09029	3.01619	7.42054e-15
P91128	rpl-13,C32E8.2	3.58712	1.84283	3.85968e-19	5.60297	2.48619	6.72614e-30
Q9XVE9	rpl-14,C04F12.4,CELE_C04F12.4	2.40385	1.26535	1.80293e-07	3.02443	1.59666	3.57154e-09
P91374	rpl-15,K11H12.2	3.96426	1.98705	1.30494e-12	7.293	2.86651	3.60153e-18
Q27389	rpl-16,M01F1.2	3.72489	1.8972	5.27077e-13	5.51573	2.46355	4.42231e-16
Q9BL19	rpl-17,Y48G8AL.8	3.76744	1.91358	1.15957e-12	5.51665	2.46379	6.52359e-20
O45946	rpl-18,Y45F10D.12	3.47595	1.79741	1.52208e-19	3.50666	1.8101	4.78757e-13
O02639	rpl-19,C09D4.5	3.79281	1.92327	9.7811e-18	5.11031	2.35341	1.25937e-18
O44480	rpl-20,E04A4.8	3.55272	1.82893	1.02796e-24	4.83616	2.27386	1.69062e-20
P34334	rpl-21,C14B9.7	4.09105	2.03247	8.2201e-10	5.66212	2.50134	5.01943e-11
P52819	rpl-22,C27A2.2	2.96628	1.56866	2.50876e-14	3.32063	1.73146	3.75982e-11
P48158	rpl-23,B0336.10	3.0752	1.62068	0.000121658	3.40357	1.76705	0.000959872
O01868	rpl-24.1,D1007.12	2.57359	1.36378	9.94787e-08	3.50727	1.81035	6.44154e-09
Q19869	rpl-26,F28C6.7	3.40261	1.76664	2.55195e-12	4.28119	2.09801	1.1732e-07
P50880	rpl-3,F13B10.2	3.75177	1.90757	1.62576e-45	5.80542	2.5374	4.83724e-44
Q9XWS4	rpl-30,CELE_Y106G6H.3,Y106G6H.3	2.52339	1.33537	2.94688e-13	2.26777	1.18127	2.96945e-12
Q22716	rpl-32,CELE_T24B8.1,T24B8.1	3.74839	1.90627	1.716e-05	6.77339	2.75988	9.02655e-09
P49180	rpl-33,F10E7.7	4.11092	2.03946	1.32017e-13	7.29998	2.86789	1.16101e-13
A3QMC5	rpl-34,C42C1.14,CELE_C42C1.14	3.52024	1.81568	1.90036e-09	4.8494	2.27781	9.71984e-09
P49181	rpl-36,F37C12.4	3.3887	1.76073	1.5848e-15	4.9613	2.31072	1.01967e-16
O02056	rpl-4,B0041.4	4.26279	2.0918	2.16251e-64	5.84813	2.54798	1.17874e-59
P49405	rpl-5,F54C9.5	3.70731	1.89037	9.9904e-36	4.37157	2.12815	9.76546e-37
P47991	rpl-6,R151.3	3.14066	1.65107	3.83682e-20	5.188	2.37518	9.40471e-28
O01802	rpl-7,F53G12.10	4.46975	2.16019	6.29616e-39	7.75938	2.95594	4.25533e-45
Q966C6	rpl-7A,Y24D9A.4	4.04139	2.01485	1.46589e-20	5.08119	2.34517	9.77549e-20
Q9XVF7	rpl-8,rpl-2,B0250.1	3.48987	1.80317	1.20881e-23	5.15951	2.36723	8.19114e-25
Q95Y90	rpl-9,R13A5.8	5.27999	2.40054	1.16559e-23	6.67938	2.73971	3.43377e-31
Q9GZH5	rpn-1,CELE_T22D1.9,T22D1.9	5.046	2.33514	3.39755e-45	4.09519	2.03393	4.59468e-20
Q18115	rpn-2,C23G10.4	3.41879	1.77349	5.03685e-20	4.20071	2.07063	2.15028e-34
Q20585	rpn-7,F49C12.8	2.37102	1.24551	5.33239e-05	2.39867	1.26223	0.0019716
G5ED21	rpoa-1,CELE_Y48E1A.1,Y48E1A.1	2.63397	1.39724	1.04731e-05	2.06428	1.04564	0.000168193
Q27493	rpoa-2,CELE_F14B4.3,F14B4.3	6.58324	2.7188	1.25865e-18	4.70695	2.23479	9.95426e-12
P46769	rps-0,B0393.1	5.43799	2.44307	3.06543e-49	8.59802	3.104	1.6888e-44
P48154	rps-1,F56F3.5	4.44567	2.1524	7.23867e-42	7.31483	2.87082	6.39395e-59
O01869	rps-10,CELE_D1007.6,D1007.6	5.03748	2.3327	1.7928e-12	10.8114	3.43448	8.80157e-18
Q20206	rps-11,CELE_F40F11.1,F40F11.1	2.56149	1.35698	1.07927e-12	3.11792	1.64058	2.08746e-13
P49196	rps-12,F54E7.2	4.14248	2.05049	1.28209e-06	7.17443	2.84286	4.65632e-09
P51404	rps-13,C16A3.9	3.68978	1.88354	2.55753e-15	4.09962	2.03549	1.61957e-13
P48150	rps-14,F37C12.9	4.04276	2.01534	3.60591e-10	5.24141	2.38995	2.11414e-10
Q9XVP0	rps-15,F36A2.6	6.95647	2.79836	5.51189e-13	8.775	3.1334	4.19658e-10
Q22054	rps-16,T01C3.6	4.82135	2.26944	1.62617e-27	7.0106	2.80954	3.02884e-26
O01692	rps-17,T08B2.10	3.51266	1.81256	2.31684e-15	5.33531	2.41557	1.88066e-17
O18240	rps-18,CELE_Y57G11C.16,Y57G11C.16	4.33095	2.11469	3.808e-19	5.99587	2.58397	1.23862e-13
O18650	rps-19,T05F1.3	4.18327	2.06463	1.38351e-11	6.75148	2.7552	9.85357e-11
P51403	rps-2,C49H3.11	5.297	2.40517	2.5892e-22	7.5076	2.90835	2.17213e-19
Q8WQA8	rps-20,CELE_Y105E8A.16,Y105E8A.16	4.36539	2.12611	1.0462e-18	7.65496	2.93639	3.48283e-21
P49197	rps-21,F37C12.11	5.92146	2.56595	3.66843e-21	7.24127	2.85624	1.90687e-18
O17218	rps-22,CELE_F53A3.3,F53A3.3	6.63323	2.72971	1.30631e-24	9.69017	3.27652	6.05789e-22
Q1XFY9	rps-24,CELE_T07A9.11,T07A9.11	2.10122	1.07122	3.18393e-08	2.77281	1.47135	6.86156e-08
P52821	rps-25,K02B2.5	5.7221	2.51654	4.36834e-18	10.6724	3.41581	3.87319e-18
O45499	rps-26,F39B2.6	3.01256	1.59099	3.00515e-06	4.57828	2.19481	0.000174085
Q9TXP0	rps-27,F56E10.4	12.855	3.68426	2.14415e-06	11.9124	3.57439	0.000251772
Q95Y04	rps-28,Y41D4B.5	3.16121	1.66048	4.00503e-16	4.6053	2.20329	1.22321e-17
P48152	rps-3,C23G10.3	5.95232	2.57345	6.29616e-39	9.54007	3.254	3.73162e-49
P49041	rps-5,T05E11.1	6.59885	2.72222	0.000172211	12.884	3.68751	9.43911e-05
Q9NEN6	rps-6,Y71A12B.1	2.71896	1.44306	1.59648e-19	3.80699	1.92865	2.37732e-29
Q23312	rps-7,ZC434.2	2.62967	1.39488	1.18005e-22	2.62241	1.39089	4.83746e-22
P48156	rps-8,F42C5.8	3.23385	1.69325	1.12032e-36	4.47338	2.16137	1.58926e-49
Q20228	rps-9,F40F8.10	4.03754	2.01348	3.83682e-20	7.16016	2.83999	2.97142e-44
Q18787	rpt-1,C52E4.4	4.38799	2.13356	2.16251e-64	4.32111	2.1114	8.36068e-60
O16368	rpt-2,F29G9.5	4.12939	2.04593	1.81104e-31	3.91203	1.96792	2.60501e-25
P46502	rpt-3,F23F12.6	4.7722	2.25465	1.53693e-39	3.94053	1.97839	5.81905e-23
O17071	rpt-4,F23F1.8	4.3899	2.13419	1.88926e-46	4.28945	2.10079	9.40267e-40
O76371	rpt-5,CELE_F56H1.4,F56H1.4	2.9707	1.5708	2.07417e-17	3.62233	1.85692	1.53512e-22
Q9XTT9	rpt-6,CELE_Y49E10.1,Y49E10.1	3.01061	1.59005	3.56229e-12	3.45814	1.79	4.07267e-18
Q9U379	rsbp-1,CELE_T06D10.1,T06D10.1	1000	9.96578	na	1000	9.96578	na
Q18453	rsd-3,C34E11.1,CELE_C34E11.1	6.58106	2.71832	0.0434824	1000	9.96578	na
Q20821	rskd-1,CELE_F55C5.7,F55C5.7	1000	9.96578	na	1000	9.96578	na
Q9NAH6	rsks-1,Y47D3A.16	4.90667	2.29474	1.83998e-19	4.15598	2.05519	5.94335e-14
O17607	ruvb-1,C27H6.2	2.62942	1.39474	5.5497e-06	2.04969	1.0354	7.13184e-05
Q8I4F7	set-18,CELE_T22A3.4,T22A3.4	2.26785	1.18133	0.000272274	2.36577	1.24231	0.000647754
O16997	sftb-2,CELE_W03F9.10,W03F9.10	2.11318	1.07941	0.00258008	1000	9.96578	na
Q20363	sip-1,F43D9.4	5.09338	2.34862	4.45802e-23	4.30731	2.10679	1.8076e-12
B2FDA8	smc-3,Y47D3A.26	2.63491	1.39775	0.011693	5.75109	2.52384	0.0357297
Q20060	smc-4,F35G12.8	1000	9.96578	na	1000	9.96578	na
O45306	sre-21,C47A10.4	1000	9.96578	na	1000	9.96578	na
O45991	srw-113,CELE_ZK1037.9,ZK1037.9	1000	9.96578	na	1000	9.96578	na
Q94239	stau-1,CELE_F55A4.5,F55A4.5	4.46278	2.15794	0.000716898	3.20293	1.67939	2.37818e-06
P53588	suca-1,F47B10.1	2.75438	1.46173	8.80552e-41	2.33449	1.2231	3.6347e-25
O45189	sup-12,CELE_T22B2.4,T22B2.4	1000	9.96578	na	1000	9.96578	na
Q9XWK6	sup-35,CELE_Y48A6C.3,Y48A6C.3	1000	9.96578	na	1000	9.96578	na
Q21166	sur-5,K03A1.5	3.87347	1.95363	1.11667e-15	3.54776	1.82691	1.09343e-11
A9D649	sut-1,CELE_T13B5.8,T13B5.8	1000	9.96578	na	1000	9.96578	na
Q9N4N4	swsn-6,CELE_ZK616.4,ZK616.4	1000	9.96578	na	1000	9.96578	na
Q95PV6	syd-9,CELE_ZK867.1,ZK867.1	1000	9.96578	na	1000	9.96578	na
Q22708	sym-2,ZK1067.6	1000	9.96578	na	1000	9.96578	na
Q18320	szy-4,C30B5.1,CELE_C30B5.1	1000	9.96578	na	1000	9.96578	na
P91455	T19B4.3	4.14959	2.05297	4.82281e-10	5.42205	2.43884	1.79726e-08
Q22508	tag-18,CELE_T14G12.3,T14G12.3	2.68917	1.42716	1.69015e-13	2.84461	1.50823	9.04538e-06
O16454	tag-196,CELE_F41E6.6,F41E6.6	2.70679	1.43658	0.0276004	2.829	1.50029	0.0215008
P34690	tba-2,C47B2.3	2.92394	1.54791	0.00351088	3.05368	1.61055	0.00115514
O17921	tbb-1,CELE_K01G5.7,K01G5.7	2.7837	1.477	8.75795e-05	2.85818	1.5151	0.000128274
P52275	tbb-2,C36E8.5	2.38005	1.25099	0.00160249	2.18157	1.12537	0.0138162
C2BR94	thoc-5,CELE_Y32H12A.2,Y32H12A.2	1000	9.96578	na	1000	9.96578	na
Q95QV8	tiar-1,C18A3.5,CELE_C18A3.5	2.50245	1.32334	0.00402603	3.21111	1.68307	0.00190135
Q23486	tofu-7,CELE_ZK418.8,ZK418.8	1000	9.96578	na	1000	9.96578	na
Q7YZT6	tps-1,tps1,ZK54.2	1000	9.96578	na	1000	9.96578	na
Q22047	trcs-2,CELE_T01B7.6,T01B7.6	3.36422	1.75027	1.76579e-07	2.82332	1.49739	1.83088e-05
G5ECM6	tufm-1,CELE_Y71H2AM.23,Y71H2AM.23	2.05498	1.03912	1.5848e-15	1.87308	0.905413	9.38297e-11
Q9XVK5	ubc-12,R09B3.4	2.19634	1.1351	0.000708198	1.90095	0.926723	0.00124517
P34631	ubxn-4,ZK353.8	1000	9.96578	na	1000	9.96578	na
H2L0C9	ugt-29,CELE_Y49C4A.8,Y49C4A.8	1000	9.96578	na	1000	9.96578	na
P34540	unc-116,khc-1,R05D3.7	2.17643	1.12197	8.07255e-15	1.72152	0.783687	6.36075e-06
G5ECL2	unc-26,JC8.10	1000	9.96578	na	1000	9.96578	na
Q17361	usp-14,tgt-1,C13B4.2	3.2255	1.68952	6.15997e-17	3.12978	1.64606	1.29913e-16
P91502	usp-5,CELE_T27A3.2,T27A3.2	2.12813	1.08959	4.35677e-07	2.94563	1.55858	2.44825e-21
P55155	vit-1,K09F5.2	2.60505	1.38131	0.000405438	2.19562	1.13463	1.91737e-07
P05690	vit-2,C42D8.2	2.8002	1.48553	5.31756e-28	2.26246	1.17789	4.30511e-21
P18948	vit-6,K07H8.6	2.39676	1.26109	8.31812e-48	2.50858	1.32687	3.59474e-47
Q23669	vps-15,CELE_ZK930.1,ZK930.1	1000	9.96578	na	1000	9.96578	na
Q18258	vps-22,C27F2.5,CELE_C27F2.5	1000	9.96578	na	1000	9.96578	na
Q9TXI7	vps-34,let-512,B0025.1	1000	9.96578	na	1000	9.96578	na
Q9BL83	vps-4,CELE_Y34D9A.10,Y34D9A.10	2.1545	1.10735	7.71522e-11	2.40767	1.26764	2.96945e-12
Q21770	wago-1,R06C7.1	3.32368	1.73278	2.65486e-25	1.7384	0.79776	0.000636303
Q23445	ZK180.4	6.68024	2.7399	7.82461e-09	5.22928	2.38661	0.000194633
Q23529	zyg-12,ber-1,ZK546.1	1000	9.96578	na	1000	9.96578	na

## Sheet: Supplementary Table 3
Supplementary Table 3. IP-MS/MS - CSR-1 ADH IP / CSR-1 WT IP
enriched proteins in CSR-1 ADH ≥ 2-fold or in CSR-1 WT IP ≤ -2-fold and p-value < 0.05 and at least 3 peptides used for quantification
Ratio of 1000 means protein was not detected in CSR-1 WT IP and a ratio of 0.0001 means protein was not detected in CSR-1 ADH IP and therefore no P-value can be calculated
gene id	name	Ratio	Log2FC	p-value
Q95ZQ4	aak-2,T01C8.1	2.69831	1.43206	2.44427e-11
O02168	aakg-2,CELE_T20F7.6,T20F7.6	3.24202	1.69689	0.0125298
O45707	abhd-11.2,CELE_R05D7.4,R05D7.4	3.09579	1.63031	4.83206e-14
O45552	acaa-2,CELE_F53A2.7,F53A2.7	2.229	1.1564	6.96227e-42
Q20507	acbp-3,F47B10.7	1000	1000	na
Q9XWZ2	acdh-11,Y45F3A.3	1000	1000	na
P91156	acin-1,C43E11.1,CELE_C43E11.1	0.346983	-1.52706	1.41427e-20
P53585	acly-1,D1005.1	2.10206	1.0718	1.73577e-22
P90731	acly-2,B0365.1,CELE_B0365.1	2.73564	1.45188	2.92672e-18
Q20264	acs-11,CELE_F41C3.3,F41C3.3	2.35116	1.23337	1.34767e-38
Q9TZI7	acs-16,CELE_F47G6.2,F47G6.2	1000	1000	na
O18693	acs-2,CELE_F28F8.2,F28F8.2	1000	1000	na
O16481	acs-21,C50H11.1,CELE_C50H11.1	1000	1000	na
Q19523	acy-1,CELE_F17C8.1,F17C8.1	0.368507	-1.44024	0.0148821
Q4W5Q8	adpr-1,CELE_Y73E7A.9,Y73E7A.9	1000	1000	na
Q86NJ4	afd-1,CELE_W03F11.6,W03F11.6	1000	1000	na
O62334	agl-1,CELE_R06A4.8,R06A4.8	3.81888	1.93315	3.8185e-33
P27604	ahcy-1,ahh,dpy-14,K02F2.2	2.918	1.54498	4.84981e-39
Q17740	ain-1,C06G1.4,CELE_C06G1.4	1000	1000	na
Q18888	aipr-1,C56C10.10,CELE_C56C10.10	3.61309	1.85323	0.0213937
Q17941	akt-1,C12D8.10	1000	1000	na
Q20780	alh-1,CELE_F54D8.3,F54D8.3	2.52689	1.33736	2.09512e-30
O02266	alh-7,CELE_F45H10.1,F45H10.1	2.93612	1.55391	3.23411e-06
P16356	ama-1,rpb-1,F36A4.7	0.407039	-1.29676	1.55557e-07
Q9XTT4	ani-1,Y49E10.19	1000	1000	na
O16637	apd-3,CELE_W09G10.4,W09G10.4	0.334782	-1.57871	1.63559e-09
Q8WQB3	apg-1,CELE_Y105E8A.9,Y105E8A.9	1000	1000	na
O01755	apm-1,CELE_F55A12.7,F55A12.7	0.391789	-1.35185	9.54178e-07
G5EFK4	arf-3,4I747,CELE_F57H12.1,F57H12.1	2.3733	1.2469	0.000517769
Q20577	arrd-24,CELE_F48F7.7,F48F7.7	1000	1000	na
Q9XXI4	arrd-7,CELE_Y17G7B.11,Y17G7B.11	2.68778	1.42642	5.87585e-15
Q21463	asns-2,CELE_M02D8.4,M02D8.4	1000	1000	na
Q21966	asp-4,CELE_R12H7.2,R12H7.2	0.339505	-1.5585	0.000675291
A0A1T5HUK0	asrA	2.05382	1.03831	2.82518e-05
G5EBK4	atg-7,CELE_M7.5,M7.5	2.07224	1.05119	1.87661e-06
G4S460	attf-3,CELE_F54C4.3,F54C4.3	1000	1000	na
Q17411	B0001.2,CELE_B0001.2	0.300635	-1.73392	7.23496e-10
O61747	B0205.10,CELE_B0205.10	0.312102	-1.67991	3.57039e-06
O16487	B0238.11,CELE_B0238.11	0.380915	-1.39246	1.09286e-21
O16614	B0281.3,CELE_B0281.3	1000	1000	na
Q9U3S6	B0379.7,CELE_B0379.7	0.262394	-1.93019	0.0358428
Q17499	B0395.3,CELE_B0395.3	2.26646	1.18044	0.000708406
Q09437	B0495.2	0.206403	-2.27646	5.82473e-06
Q03565	baf-1,B0464.7	0.16399	-2.60832	0.0139942
O44739	bag-1,F57B10.11	1000	1000	na
Q93619	bckd-1b,tag-173,CELE_F27D4.5,F27D4.5	2.02931	1.02099	3.35987e-09
Q965N3	BE0003N10.1,CELE_BE0003N10.1	2.34271	1.22818	2.06154e-05
G5ECJ5	bir-2,C50B8.2	1000	1000	na
G5EG86	brc-2,T07E3.5	0.001	-1000	na
Q17568	C01G5.5,CELE_C01G5.5	2.64532	1.40344	1.05097e-14
O44444	C02B10.4,CELE_C02B10.4	2.29589	1.19906	3.34801e-21
P34274	C02C2.6,ZK688.9	2.26477	1.17937	8.03564e-06
G5ECV3	C03H12.1,CELE_C03H12.1	1000	1000	na
P48053	C05D11.1	1000	1000	na
Q11185	C05D11.5	1000	1000	na
Q17692	C06A8.6,CELE_C06A8.6	2.20637	1.14168	1.47465e-16
P34313	C07A9.2	1000	1000	na
Q09227	C08B11.9	1000	1000	na
Q17819	C08B6.8	2.04335	1.03094	9.82594e-12
Q93209	C15A11.2,CELE_C15A11.2	3.30466	1.7245	0.000396184
Q18037	C16A3.4,CELE_C16A3.4	0.465851	-1.10206	0.0342009
Q09250	C16C10.4	0.386016	-1.37327	5.89235e-22
Q9BIA9	C17C3.1,CELE_C17C3.1	1000	1000	na
Q09958	C18A3.3	0.371561	-1.42833	1.69425e-47
O44136	C24D10.1,CELE_C24D10.1	2.30938	1.2075	0.000707655
O44133	C24D10.6,CELE_C24D10.6	2.17409	1.12041	0.00435159
O17157	C24H12.4,CELE_C24H12.4	0.47237	-1.08201	1.13056e-21
Q9U3P3	C25D7.1,CELE_C25D7.1	1000	1000	na
O17621	C29F7.2,CELE_C29F7.2	1000	1000	na
O17622	C29F7.3	2.03746	1.02677	1.83555e-06
P91122	C32E12.1,CELE_C32E12.1	0.001	-1000	na
O01685	C32F10.8,CELE_C32F10.8	3.11864	1.64092	4.19105e-06
Q95QS4	C34E10.10,CELE_C34E10.10	0.445396	-1.16684	8.93409e-12
Q18509	C38D4.4,CELE_C38D4.4	2.82748	1.49952	3.86431e-08
Q18535	C39E9.11,CELE_C39E9.11	0.169474	-2.56087	2.18733e-14
Q18577	C42D4.1,CELE_C42D4.1	4.93485	2.30301	5.38148e-29
P91154	C43E11.9,CELE_C43E11.9	2.52786	1.33791	1.14669e-07
Q18621	C44E12.1,CELE_C44E12.1	1000	1000	na
A6PVA1	C44E4.5,CELE_C44E4.5	2.03015	1.02158	0.000178995
Q95YC6	C45B2.1,CELE_C45B2.1	3.5241	1.81725	3.05256e-13
Q18691	C47E8.4	1000	1000	na
O44150	C49A9.6,CELE_C49A9.6	1000	1000	na
O17685	C49F5.7,CELE_C49F5.7	0.001	-1000	na
Q95YC4	C52A10.1,CELE_C52A10.1	2.42383	1.27729	1.54421e-05
O44538	C53A3.2,CELE_C53A3.2	1000	1000	na
Q18813	C53D6.7,CELE_C53D6.7	0.43888	-1.1881	3.91265e-16
G5EG14	cacn-1,W03H9.4	0.288398	-1.79387	4.27484e-09
Q18879	cav-2,C56A3.7	34.9587	5.12758	0.0012906
Q7Z003	cca-1,C54D2.5,CELE_C54D2.5	0.001	-1000	na
A0A0S4XR43	ccar-1,CELE_Y37A1B.1,Y37A1B.1	0.470781	-1.08687	0.0304257
P54811	cdc-48.1,C06A1.1	0.433069	-1.20733	2.35897e-06
P54812	cdc-48.2,C41C4.8	0.407571	-1.29488	0.000488961
G5EFC4	cdc-5l,CELE_D1081.8,D1081.8	0.334742	-1.57888	0.039147
Q19973	cec-5,CELE_F32E10.6,F32E10.6	0.0630029	-3.98844	4.95144e-56
Q7K714	ceh-100,CELE_Y38E10A.6,Y38E10A.6	0.329177	-1.60306	8.75127e-12
Q18922	CELE_D1014.4,D1014.4	17.5527	4.13362	0.0144174
Q18943	CELE_D1054.10,D1054.10	2.91457	1.54328	0.00443886
Q18949	CELE_D1054.3,D1054.3	2.82712	1.49933	1.49953e-18
Q18986	CELE_D2045.8,D2045.8	1000	1000	na
Q18995	CELE_D2085.7,D2085.7	1000	1000	na
I2HAE5	CELE_F01G4.4,F01G4.4	2.56355	1.35814	0.000140127
O01317	CELE_F02E9.3,F02E9.3	0.001	-1000	na
Q19132	CELE_F07A11.4,F07A11.4	1000	1000	na
Q19276	CELE_F09F7.6,F09F7.6	8.8043	3.13821	2.0354e-08
A7LPJ5	CELE_F10A3.17,F10A3.17	2.94291	1.55724	7.06367e-19
Q95QL6	CELE_F10E9.11,F10E9.11	0.33732	-1.56781	3.90413e-25
Q93520	CELE_F16B12.6,F16B12.6	1000	1000	na
N1NVB6	CELE_F17C11.4,F17C11.4	1000	1000	na
D2N112	CELE_F18A11.5,F18A11.5	1000	1000	na
Q19647	CELE_F20D6.5,F20D6.5	1000	1000	na
Q19661	CELE_F21C10.9,F21C10.9	1000	1000	na
Q19680	CELE_F21D5.1,F21D5.1	2.00938	1.00675	2.41303e-09
Q19723	CELE_F22D6.2,F22D6.2	2.9836	1.57706	0.00609255
H2KZV4	CELE_F23H11.4,F23H11.4	1000	1000	na
H2KYV5	CELE_F25E5.8,F25E5.8	1000	1000	na
Q19854	CELE_F28C1.1,F28C1.1	0.352476	-1.5044	0.00680951
O45417	CELE_F31D4.2,F31D4.2	1000	1000	na
O62197	CELE_F32A11.3,F32A11.3	3.00265	1.58624	1.70809e-09
Q95QH4	CELE_F32A5.8,F32A5.8	3.04473	1.60631	1.21905e-11
O62200	CELE_F32B4.5,F32B4.5	1000	1000	na
O01849	CELE_F32B5.7,F32B5.7	1000	1000	na
G5EDI3	CELE_F33A8.6,F33A8.6	1000	1000	na
O62219	CELE_F33H2.2,F33H2.2	1000	1000	na
Q20007	CELE_F35A5.1,F35A5.1	0.001	-1000	na
Q9XVN7	CELE_F36A2.11,F36A2.11	1000	1000	na
O45462	CELE_F36D3.4,F36D3.4	0.330795	-1.59599	0.00571369
Q20108	CELE_F36H1.3,F36H1.3	0.29736	-1.74972	1.11076e-05
Q20122	CELE_F37C12.3,F37C12.3	2.13843	1.09655	1.72036e-06
G5EE11	CELE_F39H2.3,F39H2.3	2.53661	1.3429	6.49519e-29
Q20292	CELE_F41G3.3,F41G3.3	3.22682	1.69011	0.000655446
Q9UAQ1	CELE_F41H8.1,F41H8.1	0.235634	-2.08538	0.00651283
H2L2B2	CELE_F46B6.5,F46B6.5	0.349546	-1.51644	0.0123645
Q20476	CELE_F46G10.1,F46G10.1	0.408267	-1.29242	2.88221e-40
G5EEX7	CELE_F49C12.15,F49C12.15	0.439982	-1.18449	2.03305e-11
Q9N5S7	CELE_F49H12.5,F49H12.5	0.106292	-3.2339	3.88416e-61
Q20644	CELE_F52B5.3,F52B5.3	1000	1000	na
Q20697	CELE_F53B1.4,F53B1.4	0.319804	-1.64474	0.000202082
Q9XVN1	CELE_F53B6.4,F53B6.4	0.448139	-1.15798	0.00122337
P91998	CELE_F53F1.3,F53F1.3	1000	1000	na
Q965K2	CELE_F53H1.1,F53H1.1	0.233157	-2.10063	1.88713e-68
Q20753	CELE_F54C9.3,F54C9.3	1000	1000	na
O44734	CELE_F57B10.8,F57B10.8	0.44173	-1.17876	3.82198e-20
B6EU60	CELE_F57B7.2,F57B7.2	1000	1000	na
P90898	CELE_F58G11.3,F58G11.3	2.08575	1.06057	2.11276e-07
O16281	CELE_F59A7.2,F59A7.2	1000	1000	na
H2L0A8	CELE_H05C05.1,H05C05.1	2.07008	1.04969	8.28969e-07
Q9N5N9	CELE_H06I04.3,H06I04.3	0.341596	-1.54964	4.92725e-73
O45625	CELE_H19N07.3,H19N07.3	3.30869	1.72626	0.0389349
H2L0C5	CELE_H24G06.1,H24G06.1	1000	1000	na
H2L0D0	CELE_H28G03.1,H28G03.1	1000	1000	na
Q21080	CELE_K01C8.1,K01C8.1	2.41976	1.27486	2.27167e-14
Q7YTL1	CELE_K01F9.2,K01F9.2	1000	1000	na
P90904	CELE_K02B12.7,K02B12.7	1000	1000	na
O16632	CELE_K02F6.4,K02F6.4	2.87535	1.52374	0.0288247
Q21173	CELE_K03B4.2,K03B4.2	1000	1000	na
Q21210	CELE_K04C2.2,K04C2.2	0.411072	-1.28254	0.00125696
O44772	CELE_K04F10.7,K04F10.7	0.33795	-1.56512	1.15596e-06
Q21298	CELE_K07F5.14,K07F5.14	0.281686	-1.82784	0.000187435
G5ECC9	CELE_K11B4.1,K11B4.1	0.136754	-2.87034	0.0244705
O76686	CELE_M01G5.1,M01G5.1	0.380617	-1.39359	6.72881e-09
H2L0G8	CELE_M01H9.3,M01H9.3	1000	1000	na
P90933	CELE_M04C9.3,M04C9.3	2.30319	1.20363	1.16304e-07
Q0G841	CELE_M106.7,M106.7	1000	1000	na
Q21589	CELE_M7.8,M7.8	2.3671	1.24312	0.0316204
U4PFH6	CELE_R02D3.1,R02D3.1	1000	1000	na
H2KYE1	CELE_R11G1.6,R11G1.6	0.46749	-1.09699	1.78478e-07
O62349	CELE_R11H6.5,R11H6.5	1000	1000	na
Q8ITY8	CELE_R148.3,R148.3	2.24508	1.16676	0.0236046
Q6AHR3	CELE_R151.2,R151.2	2.22135	1.15144	2.03866e-11
Q22056	CELE_T01C3.2,T01C3.2	0.262025	-1.93222	1.01269e-09
Q22107	CELE_T02G5.3,T02G5.3	0.132042	-2.92093	0.0312906
Q22137	CELE_T04A8.7,T04A8.7	2.14059	1.09801	6.75382e-38
Q22290	CELE_T07C4.3,T07C4.3	0.413699	-1.27335	0.000228447
O16725	CELE_T07D3.9,T07D3.9	2.31087	1.20844	8.63926e-10
Q22414	CELE_T12A2.5,T12A2.5	0.001	-1000	na
O45783	CELE_T12D8.5,T12D8.5	1000	1000	na
Q22493	CELE_T14F9.2,T14F9.2	1000	1000	na
Q9U367	CELE_T16G1.9,T16G1.9	1000	1000	na
K8FE09	CELE_T16G12.7,T16G12.7	0.248959	-2.00602	0.0178435
Q22540	CELE_T18D3.1,T18D3.1	0.319208	-1.64743	3.50233e-10
Q22562	CELE_T19B10.2,T19B10.2	0.001	-1000	na
O02169	CELE_T20F7.1,T20F7.1	1000	1000	na
Q22749	CELE_T24G10.2,T24G10.2	0.465803	-1.10221	0.000426745
Q23128	CELE_W02B12.12,W02B12.12	0.343304	-1.54244	9.93501e-11
Q9UAY5	CELE_W03G1.2,W03G1.2	0.001	-1000	na
G5EDE4	CELE_W08E3.2,W08E3.2	2.27685	1.18704	2.07104e-07
O45011	CELE_W10C8.5,W10C8.5	1000	1000	na
Q9U304	CELE_Y106G6D.7,Y106G6D.7	0.334892	-1.57823	1.91816e-11
Q95Y35	CELE_Y108G3AL.2,Y108G3AL.2	0.198747	-2.33099	4.81625e-18
Q9NEM5	CELE_Y111B2A.3,Y111B2A.3	1000	1000	na
Q9U2U3	CELE_Y116A8C.27,Y116A8C.27	2.1377	1.09606	1.76711e-16
H2L0S8	CELE_Y119D3B.12,Y119D3B.12	0.148326	-2.75315	2.73114e-21
Q9TYQ2	CELE_Y24D9B.1,Y24D9B.1	2.64196	1.40161	0.012998
H2KYA0	CELE_Y25C1A.8,Y25C1A.8	0.001	-1000	na
H2KY66	CELE_Y37E11B.10,Y37E11B.10	0.331842	-1.59143	8.3533e-06
Q9BKU5	CELE_Y37E3.8,Y37E3.8	0.226372	-2.14323	6.14829e-11
Q9U2N7	CELE_Y37H2A.1,Y37H2A.1	1000	1000	na
Q95X11	CELE_Y38A10A.7,Y38A10A.7	1000	1000	na
H2L095	CELE_Y39H10B.2,Y39H10B.2	0.415132	-1.26836	0.00350302
Q95Y11	CELE_Y41D4B.11,Y41D4B.11	0.338584	-1.56242	2.31112e-30
Q9N3Y1	CELE_Y42H9AR.1,Y42H9AR.1	28.8733	4.85166	8.32856e-24
Q9GUI8	CELE_Y45G5AM.3,Y45G5AM.3	1000	1000	na
S6FD25	CELE_Y47D7A.18,Y47D7A.18	0.189315	-2.40114	0.00401012
Q9N3R8	CELE_Y47G6A.3,Y47G6A.3	0.001	-1000	na
Q9N3S5	CELE_Y47G6A.5,Y47G6A.5	4.33556	2.11622	0.00775734
Q9BL76	CELE_Y48G1C.9,Y48G1C.9	1000	1000	na
Q9N4U1	CELE_Y49F6B.2,Y49F6B.2	0.188953	-2.4039	1.06051e-71
G4S703	CELE_Y50D4A.1,Y50D4A.1	1000	1000	na
O18215	CELE_Y53C12B.1,Y53C12B.1	1000	1000	na
Q966A9	CELE_Y54B9A.1,Y54B9A.1	1000	1000	na
Q9N3F2	CELE_Y54E10A.6,Y54E10A.6	2.29803	1.2004	3.89727e-36
Q9N368	CELE_Y55F3AM.3,Y55F3AM.3	0.105136	-3.24967	7.60313e-52
Q7YTH6	CELE_Y62E10A.19,Y62E10A.19	1000	1000	na
Q95Q05	CELE_Y66D12A.10,Y66D12A.10	2.31098	1.20851	0.00719099
A0A0K3AUY4	CELE_Y66D12A.16,Y66D12A.16	1000	1000	na
Q95PZ6	CELE_Y66D12A.19,Y66D12A.19	2.13924	1.0971	0.00119121
Q95XH0	CELE_Y69A2AR.28,Y69A2AR.28	1000	1000	na
Q9XW38	CELE_Y69E1A.2,Y69E1A.2	2.05944	1.04225	0.0208616
Q9XW37	CELE_Y69E1A.5,Y69E1A.5	2.02369	1.01699	0.0415789
Q9BL35	CELE_Y71H2AM.20,Y71H2AM.20	3.09906	1.63183	0.026497
Q9U1R8	CELE_Y79H2A.3,Y79H2A.3	0.148654	-2.74997	1.77727e-06
Q9BPN9	CELE_Y92H12BR.2,Y92H12BR.2	3.18888	1.67305	2.25685e-16
O44183	CELE_ZC416.6,ZC416.6	2.39814	1.26192	0.00132798
Q9N4P3	CELE_ZK121.2,ZK121.2	1000	1000	na
O44195	CELE_ZK185.3,ZK185.3	2.11286	1.0792	3.18829e-21
O44895	CELE_ZK484.3,ZK484.3	2.01009	1.00726	1.49732e-10
Q23526	CELE_ZK546.2,ZK546.2	2.51089	1.3282	7.74357e-05
Q23091	CELE_ZK742.4,ZK742.4	2.7073	1.43685	0.00243338
A5HU91	CELE_ZK813.7,ZK813.7	1000	1000	na
Q7YTT9	CELE_ZK909.6,ZK909.6	1000	1000	na
C1P629	cfim-2,CELE_D1046.1,D1046.1	0.318271	-1.65167	9.11844e-18
Q9XUE7	cfp-1,CELE_F52B11.1,F52B11.1	0.395509	-1.33822	0.0283805
Q18905	cgp-1,Y38C9A.2	2.90247	1.53728	2.87739e-10
Q22824	cgr-1,CELE_T27A10.7,T27A10.7	0.001	-1000	na
Q9U1Y5	chk-2,cds-1,Y60A3A.12	1000	1000	na
O17610	cka-1,C28D4.2,CELE_C28D4.2	2.23612	1.16099	6.45962e-10
P34531	clip-1,M01A8.2	1000	1000	na
O16305	cmd-1,T21H3.3	1000	1000	na
O18235	coq-3,CELE_Y57G11C.11,Y57G11C.11	3.06726	1.61695	1.2419e-07
O01835	cpb-3,B0414.5	0.261392	-1.93572	0.0013416
Q09221	cpna-2,B0228.4	0.001	-1000	na
Q9NB31	cst-1,F14H12.4	1000	1000	na
O61235	ctl-1,cat-2,Y54G11A.6	1000	1000	na
Q03560	ctr-9,B0464.2	0.13193	-2.92216	0.000126816
P52017	cyn-10,cyp-10,B0252.4	0.15543	-2.68567	1.15965e-10
P52010	cyn-2,cyp-2,ZK520.5	2.05193	1.03698	5.22136e-06
P52015	cyn-7,cyp-7,Y75B12B.2	2.10684	1.07508	0.00731917
P52016	cyn-8,cyp-8,D1009.2	0.314413	-1.66927	1.18529e-09
Q9XVS4	dao-5,C25A1.10,CELE_C25A1.10	0.392807	-1.34811	8.19294e-08
P34529	dcr-1,K12H4.8	1000	1000	na
Q17569	ddi-1,C01G5.6,CELE_C01G5.6	1000	1000	na
Q22308	ddx-19,CELE_T07D4.4,T07D4.4	2.44571	1.29025	1.3405e-18
U4PBM1	denn-4,CELE_F52C12.4,F52C12.4	1000	1000	na
Q09979	dhs-6,C17G10.8,CELE_C17G10.8	1000	1000	na
Q21557	dlc-2,M18.2	1000	1000	na
O17953	dld-1,LLC1.3	4.12051	2.04282	0.000115481
Q20774	dnj-13,CELE_F54D5.8,F54D5.8	0.379041	-1.39958	2.24985e-37
Q9N3E0	dnj-28,CELE_Y54E10BL.4,Y54E10BL.4	3.34819	1.74338	3.1179e-10
Q19086	dpf-4,CELE_F01F1.5,F01F1.5	2.2576	1.17479	2.95021e-07
Q03577	drs-1,B0464.1	0.432412	-1.20952	7.8578e-29
Q9XWF2	dxbp-1,dox-1,CELE_Y52B11A.9,Y52B11A.9	0.31489	-1.66708	1.50732e-18
P39055	dyn-1,C02C6.1	2.36315	1.24071	4.10809e-05
A0A078BQL1	ECA2,At4g00900	1000	1000	na
Q9U364	ect-2,CELE_T19E10.1,T19E10.1	1000	1000	na
Q09299	EEED8.10	0.321475	-1.63722	0.00225619
U4PLQ8	egrh-3,CELE_Y94H6A.11,Y94H6A.11	1000	1000	na
Q9TXU7	eif-1.a,CELE_H06H21.3,H06H21.3	0.367418	-1.44451	3.2503e-10
Q95XR0	eif-2gamma,CELE_Y39G10AR.8,Y39G10AR.8	0.435242	-1.20011	1.56534e-44
G5ECR7	elb-1,3L686,CELE_Y41C4A.10,Y41C4A.10	2.1485	1.10333	2.49352e-10
Q18195	elpc-4,C26B2.6	1000	1000	na
Q9XU56	ensa-1,CELE_K10C3.2,K10C3.2	2.90162	1.53686	3.28473e-08
Q9BI71	epn-1,CELE_T04C10.2,T04C10.2	2.70152	1.43377	0.00163429
Q7YTU4	ero-1,Y105E8B.8	2.25667	1.17419	2.95618e-05
Q304D5	erp-44.1,C30H7.2,CELE_C30H7.2	2.3908	1.25749	7.94473e-49
P53015	F31E3.4	2.19377	1.13341	4.84705e-06
Q09556	F33H1.3	4.1751	2.06181	1.13197e-23
P41880	F37A4.2	0.403512	-1.30932	6.44549e-05
O44400	F37C4.5	1000	1000	na
Q20230	F40F8.1	2.72799	1.44784	0.000485137
P34416	F42H10.3	2.40993	1.26899	0.00580172
P54073	F44G4.1	0.425239	-1.23365	8.51716e-38
P91309	F46F11.1	1000	1000	na
Q10454	F46H5.3	2.17525	1.12118	9.27563e-25
Q20588	F49C12.11	2.27673	1.18697	8.71466e-07
Q9TXV7	F52C12.1	1000	1000	na
P91318	F53E10.6	0.348029	-1.52272	1.90036e-09
P34439	F54C8.1	1000	1000	na
Q20762	F54D1.6	2.49746	1.32046	0.0426956
Q20772	F54D5.7	3.32279	1.7324	8.3124e-13
Q564X7	F59C6.12	2.22284	1.1524	0.039764
G5EBJ7	fbp-1,fbp,CELE_K07A3.1,K07A3.1	3.03856	1.60339	8.36998e-13
O45159	fbxa-65,C17B7.11,CELE_C17B7.11	2.19951	1.13719	0.0046553
O16766	fbxc-27,CELE_R07C3.10,R07C3.10	1000	1000	na
D0VWL6	fln-2,C23F12.1,CELE_C23F12.1	0.385548	-1.37502	1.7812e-21
P34562	gcc-2,T05G5.9	1000	1000	na
Q20117	gcs-1,F37B12.2	2.21182	1.14523	9.70169e-47
Q22968	gcst-1,CELE_F25B4.1,F25B4.1	2.56382	1.3583	8.81291e-45
Q23621	gdh-1,CELE_ZK829.4,ZK829.4	2.25236	1.17143	3.62779e-66
P30627	glb-1,cbg-1,glo,ZK637.13	1000	1000	na
Q17339	gld-1,T23G11.3	0.431976	-1.21098	0.0371604
Q21962	gldc-1,CELE_R12C12.1,R12C12.1	2.3196	1.21388	1.49243e-26
P34689	glh-1,T21G5.3	2.55415	1.35284	4.7987e-49
O76743	glh-4,T12F5.3	2.91233	1.54217	5.64613e-30
P34497	gln-2,K03H1.1	2.13404	1.09359	0.000470714
Q9N456	glrx-10,CELE_Y34D9A.6,Y34D9A.6	2.08556	1.06043	4.15466e-05
O45293	gly-8,Y66A7A.6	0.368321	-1.44097	2.12963e-10
A0A061ACY0	GLYI	1000	1000	na
Q09580	gmps-1,M106.4	2.94265	1.55712	2.80795e-38
Q9N5U2	grl-27,CELE_F40C5.3,F40C5.3	0.262772	-1.92812	0.00952516
Q10039	grs-1,T10F2.1	2.07237	1.05128	5.33837e-61
Q18444	grsp-3,C34D4.11,CELE_C34D4.11	0.435959	-1.19773	0.00803845
P91252	gst-6,F11G11.3	1000	1000	na
Q21217	gta-1,K04D7.3	1000	1000	na
P92022	gut-2,CELE_T10G3.6,T10G3.6	1000	1000	na
H2KYQ5	gyg-1,F56B6.4	1000	1000	na
Q19341	haao-1,K06A4.5	1000	1000	na
G5EC23	hcf-1,C46A5.9,CELE_C46A5.9	2.12491	1.0874	2.24609e-09
G5EDA3	hcp-4,CELE_T03F1.9,T03F1.9	1000	1000	na
P15796	hil-2,Y73B6BL.9	0.358621	-1.47947	1.46805e-07
Q22360	him-17,CELE_T09E8.2,T09E8.2	0.449526	-1.15352	0.0433048
O45494	hinf-1,CELE_F39B2.1,F39B2.1	7.22318	2.85263	0.0451244
O44476	hoe-1,E04A4.4	0.001	-1000	na
Q9U2M4	hphd-1,Y38F1A.6	2.20695	1.14205	1.91846e-29
G5ED17	hpo-11,CELE_H37N21.1,H37N21.1	1000	1000	na
Q93795	hpo-31,CELE_F55B12.4,F55B12.4	2.08339	1.05894	3.64735e-11
K8FDY0	hpo-34,CELE_F29G6.3,F29G6.3	4.52816	2.17893	5.69769e-26
Q05036	hsp-110,C30C11.4	2.4863	1.314	2.14805e-52
Q27511	htz-1,R08C7.3	0.41564	-1.26659	0.048217
Q18885	icd-1,C56C10.8	0.425286	-1.2335	2.74493e-45
Q10663	icl-1,gei-7,C05E4.9	2.68802	1.42654	6.3074e-35
G5EE37	icp-1,CELE_Y39G10AR.13,Y39G10AR.13	1000	1000	na
Q86DC6	ifd-1,R04E5.10	1000	1000	na
O61955	ife-3,B0348.6	2.4712	1.30521	5.2828e-06
Q20898	ifet-1,spn-2,F56F3.1	2.98762	1.579	1.7445e-10
Q20751	iff-2,F54C9.1	2.32155	1.21509	4.96579e-14
Q20330	ifo-1,ttm-4,CELE_F42C5.10,F42C5.10	2.78545	1.47791	8.37424e-07
Q09501	ifp-1,C43C3.1	3.80707	1.92868	6.74034e-10
G5EFZ1	ipgm-1,F57B10.3	2.11994	1.08402	3.02259e-09
P34492	K02D10.1	1000	1000	na
Q21278	K07C5.6	0.267836	-1.90058	2.09994e-07
Q09407	K07E1.1	2.0463	1.03302	0.00607906
P34524	K12H4.3	0.263274	-1.92536	6.29017e-53
O44408	kgb-1,T07A9.3	2.75068	1.45979	1.07709e-07
Q8MQ20	klp-4,CELE_F56E3.3,F56E3.3	0.254478	-1.97439	0.0248125
O44548	knl-2,K06A5.4	0.411232	-1.28197	0.00342443
P34705	kup-1,F10C2.2	1000	1000	na
Q20489	lact-1,CELE_F46H5.8,F46H5.8	1000	1000	na
O01814	lbp-5,W02D3.7	2.37874	1.2502	0.000428427
G5EBV4	lec-10,CELE_W01A11.4,W01A11.4	1000	1000	na
Q09610	lec-8,R07B1.10	1000	1000	na
O61967	let-413,F26D11.11	1000	1000	na
O44743	let-607,CELE_F57B10.1,F57B10.1	1000	1000	na
Q95Q62	lfe-2,C46H11.4	1000	1000	na
G5EEI1	lgl-1,CELE_F56F10.4,F56F10.4	1000	1000	na
Q27474	lig-1,C29A12.3	1000	1000	na
P45970	lin-5,T09A5.10	1000	1000	na
G5EBR0	lir-1,CELE_F18A1.3,F18A1.3	6.44927	2.68914	6.43146e-08
Q8IG68	lpd-2,C48E7.3,CELE_C48E7.3	0.364282	-1.45687	3.80429e-08
O44991	lpd-6,CELE_K09H9.6,K09H9.6	0.429119	-1.22055	3.06779e-16
O44441	mai-2,B0546.1	4.51805	2.1757	0.0127052
Q18494	maph-1.3,C36A4.5,CELE_C36A4.5	1000	1000	na
Q20062	marb-1,CELE_F35G2.2,F35G2.2	2.22659	1.15483	0.020632
Q2V074	math-4,C08F1.5,CELE_C08F1.5	1000	1000	na
G5EFR6	mca-1,4K392,CELE_W09C2.3,W09C2.3	0.245671	-2.0252	0.00806754
Q9UAV5	mdh-1,CELE_F46E10.10,F46E10.10	2.46715	1.30285	1.1506e-09
Q18508	mel-28,C38D4.3	2.98262	1.57658	0.00167289
A4LBC2	met-1,C43E11.3,CELE_C43E11.3	0.172674	-2.53388	0.0209247
Q2MDF2	metl-2,CELE_Y53F4B.42,Y53F4B.42	1000	1000	na
Q09582	metr-1,R03D7.1	0.443463	-1.17311	2.77323e-05
Q23356	mig-15,ZC504.4	1000	1000	na
Q9U2L2	mlt-3,CELE_Y39C12A.1,Y39C12A.1	1000	1000	na
Q23381	mmcm-1,ZK1058.1	2.23281	1.15886	1.37731e-21
Q09530	mog-5,EEED8.5	0.436401	-1.19627	2.54569e-05
Q23243	morc-1,CELE_ZC155.3,ZC155.3	0.423647	-1.23907	3.2472e-10
H9G340	mpst-3,CELE_H12D21.7,H12D21.7	1000	1000	na
Q19625	mrp-6,CELE_F20B6.3,F20B6.3	0.285895	-1.80644	0.000210778
P34264	mrpl-11,B0303.15	2.31473	1.21084	0.00604088
O45110	mrpl-2,CELE_F56B3.8,F56B3.8	1000	1000	na
Q9TVW5	msp-77,F32B6.6,msp-79,T13F2.10	3.65112	1.86834	0.0464074
Q9N589	mtm-1,Y110A7A.5	1000	1000	na
Q27371	mup-2,T22E5.5	0.435724	-1.19851	3.29831e-14
Q17978	mut-14,C14C11.6,CELE_C14C11.6	2.89255	1.53234	5.67125e-23
Q18446	mutd-1,C34D4.13	1000	1000	na
Q95PZ8	nars-2,CELE_Y66D12A.23,Y66D12A.23	1000	1000	na
Q9N489	ncap-1,CELE_Y110A2AR.3,Y110A2AR.3	1000	1000	na
A0A1N7SYP3	ND2	1000	1000	na
P91148	ndx-7,C43E11.7	2.38454	1.25371	1.99813e-15
Q27473	nex-3,C28A5.3,CELE_C28A5.3	1000	1000	na
Q19818	nhl-2,CELE_F26F4.7,F26F4.7	1000	1000	na
Q93791	nid-1,CELE_F54F3.1,F54F3.1	1000	1000	na
P46548	nmt-1,T17E9.2	4.58565	2.19713	2.6159e-60
Q9TYV5	nol-1,CELE_W07E6.1,W07E6.1	3.10592	1.63502	1.30763e-08
Q9U3B6	nol-9,K09B11.2	1000	1000	na
Q9XVR8	nola-3,C25A1.6	0.378268	-1.40252	0.00561921
G5EF32	npa-1,5H561,CELE_VC5.3,VC5.3	6.57606	2.71722	1.62119e-06
H2KYU6	npl-4.1,CELE_F59E12.4,F59E12.4	1000	1000	na
G5EC64	nrfl-1,C01F6.6,CELE_C01F6.6	10.836	3.43776	1.11566e-41
O44902	nspd-1,CELE_ZK484.8,ZK484.8	1000	1000	na
O01879	nstp-3,CELE_ZC250.3,ZC250.3	4.1092	2.03886	0.0169575
Q21233	nuo-4,CELE_K04G7.4,K04G7.4	25.0818	4.64857	6.02745e-15
Q23629	ogdh-2,ZK836.2	1000	1000	na
O45750	osm-7,CELE_T05D4.4,T05D4.4	0.391398	-1.35329	1.90073e-05
Q9N392	oxy-4,Y54H5A.4	1000	1000	na
P90783	pafo-1,C55A6.9	0.40879	-1.29057	0.0152082
P90925	pah-1,bas-2,K08F8.4	2.36021	1.23892	9.62116e-09
P34653	panl-3,PAN3,ZK632.7	3.80273	1.92703	3.86715e-07
O45869	pars-2,CELE_T27F6.5,T27F6.5	9.12032	3.18908	1.07079e-41
A5JYS0	pcs-1,CELE_F54D5.1,F54D5.1	1000	1000	na
Q9U300	pdpr-1,CELE_Y106G6H.5,Y106G6H.5	2.23553	1.16062	8.42248e-12
U4PCM1	pfs-2,CELE_R06A4.9,R06A4.9	1000	1000	na
P34885	pkc-1,kin-13,pkc-1b,ttx-4,F57F5.5	2.1696	1.11743	0.035462
G5EFI8	plc-1,F31B12.1	0.351438	-1.50866	0.00130525
Q17446	pmk-1,B0218.3	2.12928	1.09037	2.00923e-05
H2KYP7	pnk-1,C10G11.5,CELE_C10G11.5	2.01521	1.01093	0.0172832
Q95ZQ5	pnn-1,CELE_R186.7,R186.7	0.324268	-1.62474	0.000627014
K8ESK9	pod-1,CELE_Y76A2B.1,Y76A2B.1	4.50231	2.17066	2.94525e-40
Q19775	ppm-1,F25D1.1	2.46976	1.30437	2.17966e-22
P49596	ppm-2,T23F11.1	2.24996	1.1699	1.71406e-07
P91094	pqn-15,C24A8.3,CELE_C24A8.3	1000	1000	na
O02238	pqn-27,CELE_E01G4.4,E01G4.4	2.4288	1.28024	8.55959e-05
Q7JLH5	pqn-70,CELE_T19B10.4,T19B10.4	3.90529	1.96543	3.3059e-34
Q8MXT1	prdx-6,CELE_Y38C1AA.11,Y38C1AA.11	2.07068	1.05011	9.09166e-09
P90786	prg-1,CELE_D2030.6,D2030.6	2.1798	1.12419	1.59069e-27
O44729	prp-17,CELE_F49D11.1,F49D11.1	0.471382	-1.08503	1.13767e-07
G5EET8	pud-1.2,pud-1.1,CELE_F15E11.13,CELE_Y19D10B.7,F15E11.13,Y19D10B.7	4.10935	2.03891	0.0176561
G5EEV5	pud-3,5C820,CELE_F15E11.15,F15E11.15	5.03881	2.33308	6.95832e-26
Q09476	pxl-1,tag-327,C28H8.6	1000	1000	na
B7WNA0	pyk-1,CELE_F25H5.3,F25H5.3	2.075	1.05311	6.32705e-16
Q09413	R03D7.4	1000	1000	na
P30640	R08D7.1	0.34194	-1.54819	0.0335624
P30643	R08D7.4	3.23208	1.69246	0.0281932
Q21890	R102.4	1000	1000	na
Q22743	raga-1,CELE_T24F1.1,T24F1.1	1000	1000	na
Q21194	rei-2,K03E6.7	1000	1000	na
O01585	rga-3,CELE_K09H11.3,K09H11.3	1000	1000	na
Q19852	rgl-1,CELE_F28B4.2,F28B4.2	1000	1000	na
Q8MQB5	rmd-2,C27H6.4,CELE_C27H6.4	2.1043	1.07334	1.69083e-19
O17917	rnf-113,K01G5.1	1000	1000	na
Q86MG7	rnh-1.0,CELE_F59A6.6,F59A6.6	0.161332	-2.63189	0.048217
Q21155	rnp-5,CELE_K02F3.11,K02F3.11	0.234943	-2.08962	2.43875e-18
O02092	rpb-4,CELE_F43E2.2,F43E2.2	2.27401	1.18524	1.76825e-06
Q27492	rpc-2,CELE_F09F7.3,F09F7.3	0.457147	-1.12927	1.23108e-10
Q9BL19	rpl-17,Y48G8AL.8	0.382944	-1.38479	1.23074e-15
P52819	rpl-22,C27A2.2	0.396054	-1.33623	4.51473e-21
P48158	rpl-23,B0336.10	0.395021	-1.34	5.22327e-14
O01868	rpl-24.1,D1007.12	0.319583	-1.64574	2.66456e-19
O17570	rpl-38,C06B8.8	0.271828	-1.87923	9.39864e-12
P52814	rpl-39,C26F1.9	0.438065	-1.19078	0.00369087
G5ED21	rpoa-1,CELE_Y48E1A.1,Y48E1A.1	0.463299	-1.10999	3.42951e-07
Q27493	rpoa-2,CELE_F14B4.3,F14B4.3	0.391412	-1.35324	3.37799e-05
Q19877	rps-23,F28D1.7	0.328204	-1.60733	0.0222253
Q23121	rsp-1,srp-5,W02B12.3	0.140985	-2.82638	6.65458e-23
Q23120	rsp-2,srp-4,W02B12.2	0.121292	-3.04344	1.40121e-28
Q9NEW6	rsp-3,Y111B2A.18	0.228886	-2.1273	1.03808e-52
Q09511	rsp-4,srp-2,EEED8.7	0.149179	-2.74488	6.49519e-29
Q10021	rsp-5,srp-3,T28D9.2	0.0884715	-3.49864	3.51878e-14
Q18409	rsp-6,srp-1,C33H5.12	0.11982	-3.06106	2.12656e-28
O01159	rsp-7,D2089.1	0.232113	-2.1071	4.6928e-08
Q9XTZ2	rsp-8,C18D11.4,CELE_C18D11.4	0.167545	-2.57738	1.56831e-19
Q9U252	rsy-1,CELE_Y53H1A.1,Y53H1A.1	0.164761	-2.60156	0.0433126
G5EBY0	rtfo-1,F25B3.6	0.248284	-2.00994	1.19371e-06
O17680	sams-1,C49F5.1	2.23366	1.15941	1.71785e-21
G5EEK8	sca-1,mca-4,CELE_K11D9.2,K11D9.2	0.394006	-1.34371	1.09015e-15
Q09415	set-14,R06F6.4	2.56821	1.36077	0.0140982
A9D2P7	seu-1,CELE_Y73B6BL.5,Y73B6BL.5	1000	1000	na
G5EF97	sfa-1,sf1,CELE_Y116A8C.32,Y116A8C.32	0.446181	-1.1643	6.56531e-19
G5EEW6	sig-7,F39H2.2	0.185827	-2.42797	1.88795e-45
G5EE67	skr-3,CELE_F44G3.6,F44G3.6	2.29367	1.19766	9.76315e-09
Q9U1Y9	skr-4,CELE_Y60A3A.18,Y60A3A.18	2.099	1.0697	2.47126e-06
O76512	smg-2,Y48G8AL.6	2.37504	1.24795	1.29204e-64
G5EEG7	smu-1,CC4.3,CELE_CC4.3	2.03407	1.02437	4.30622e-08
Q94050	sna-2,CELE_T13F2.7,T13F2.7	0.220971	-2.17807	7.01919e-11
Q9XTU6	snr-6,Y49E10.15	1000	1000	na
Q21739	snrp-27,CELE_R05D11.7,R05D11.7	0.261923	-1.93278	0.000920741
Q9GYJ9	snx-1,C05D9.1,CELE_C05D9.1	2.41477	1.27188	1.15377e-07
Q22875	soc-2,sur-8,AC7.2	2.2459	1.1673	1.54635e-06
Q17334	sodh-1,K12G11.3	4.00642	2.00231	4.62616e-42
Q8MNV0	spas-1,C24B5.2	2.57662	1.36548	0.000417607
Q17626	spch-1,C04G2.8,CELE_C04G2.8	0.223094	-2.16428	0.0313946
B4E3X6	spds-1,CELE_Y46G5A.19,Y46G5A.19	2.12176	1.08526	1.52041e-10
P54217	spe-11,F48C1.7	0.447591	-1.15975	0.0256056
Q9N3Z0	sqst-2,CELE_Y40C5A.1,Y40C5A.1	0.20892	-2.25898	0.000152803
Q23347	ssq-3,CELE_ZC477.1,ZC477.1	1000	1000	na
Q9NAD6	sta-1,Y51H4A.17	1000	1000	na
Q20977	sta-2,stat-b,F58E6.1	2.10302	1.07246	0.016016
P53596	sucl-1,C05G5.4	2.13014	1.09095	8.3124e-13
Q564Z8	suds-3,CELE_T07C12.14,T07C12.14	0.350278	-1.51343	0.0320647
D5MCR3	sup-26,CELE_R10E4.2,R10E4.2	2.89366	1.5329	9.87405e-08
Q94207	sup-36,CELE_F38A5.7,F38A5.7	1000	1000	na
Q9N537	szy-2,CELE_Y32H12A.4,Y32H12A.4	2.40053	1.26335	0.000392702
G5EGU9	szy-20,szy-20A,C18E9.3,CELE_C18E9.3	1000	1000	na
P91408	T01B11.2	2.58909	1.37244	0.00147331
Q9XVJ2	T03F6.3	1000	1000	na
O44410	T07A9.8	0.393304	-1.34628	6.69149e-25
Q94045	T13F2.2	0.134302	-2.89645	1.34289e-32
Q10009	T19C3.3	2.60752	1.38268	1.97633e-07
O01615	T19H12.2	2.04529	1.0323	5.29464e-06
Q9GZH3	T22D1.3	1000	1000	na
G5EEM6	tap-1,C44H4.5	2.19314	1.133	8.26841e-10
G5EF83	tasp-1,CELE_K01G5.9,K01G5.9	3.00526	1.58749	0.0191643
Q9U2D8	tbc-17,CELE_Y46G5A.1,Y46G5A.1	2.03787	1.02706	0.0400499
Q93573	tct-1,F25H2.11	2.24403	1.16609	1.61445e-40
Q93565	tli-1,CELE_F25H2.1,F25H2.1	2.42241	1.27644	0.00105735
P34314	tlk-1,C07A9.3	1000	1000	na
Q20334	tni-1,F42E11.4	0.363825	-1.45869	6.6882e-10
H2KYL8	tnt-3,C14F5.3,CELE_C14F5.3	1000	1000	na
Q19253	toca-1,F09E10.8	3.20365	1.67971	1.72865e-25
O17966	top-1,M01E5.5	0.12388	-3.01298	8.4164e-40
Q95XT5	trap-1,CELE_Y71F9AM.6,Y71F9AM.6	0.458823	-1.12399	6.38367e-13
P52709	trs-1,C47D12.6	2.12334	1.08633	4.39124e-39
P55955	ttr-16,Y5F2A.1	2.15886	1.11027	0.00452447
P34500	ttr-2,K03H1.4	2.27964	1.1888	0.0120305
Q03575	ttr-5,C40H1.5	1000	1000	na
H2KYJ2	ttr-59,CELE_T08A9.11,T08A9.11	1000	1000	na
G5EES9	txl-1,txl,CELE_Y54E10A.3,Y54E10A.3	2.23026	1.15721	1.69424e-10
P52478	ubc-1,C35B1.1	3.40204	1.7664	0.000379664
Q95XX0	ubc-13,Y54G2A.31	2.58617	1.37082	1.9281e-05
Q95017	ubc-9,F29B9.6	4.07508	2.02683	4.42625e-08
H2L056	ubxn-3,CELE_F48A11.5,F48A11.5	5.22985	2.38677	2.61264e-08
Q8WTJ4	ubxn-6,CELE_H06H21.6,H06H21.6	1000	1000	na
G5EDZ2	umps-1,rad-6,T07C4.1	3.01117	1.59033	1.12996e-06
P10567	unc-15,F07A5.7	2.45269	1.29437	9.20659e-16
P34815	unc-18,lan-2,F27D9.1	2.87861	1.52537	0.000141463
E0AHA7	unc-70,CELE_K11C4.3,K11C4.3	1000	1000	na
O61528	unc-73,CELE_F55C7.7,F55C7.7	1000	1000	na
Q19203	unc-98,F08C6.7	2.41005	1.26906	0.00641896
Q23652	usip-1,CELE_ZK863.4,ZK863.4	3.34848	1.74351	9.97329e-10
P91303	vha-10,F46F11.5	2.04412	1.03148	5.82487e-09
Q9XXU9	vha-11,Y38F2AL.3	0.310768	-1.68609	0.0178602
Q19626	vha-12,F20B6.2	2.83083	1.50122	4.31841e-39
Q9XW92	vha-13,Y49A3A.2	2.23328	1.15916	1.56594e-68
P34462	vha-14,F55H2.2	2.63955	1.40029	1.63559e-09
Q95X44	vha-8,C17H12.14,CELE_C17H12.14	2.66255	1.41281	5.31364e-32
P06125	vit-5,C04F6.1	1000	1000	na
Q86D99	vps-29,CELE_ZK1128.8,ZK1128.8	1000	1000	na
Q95XW9	vrp-1,CELE_Y54G2A.3,Y54G2A.3	1000	1000	na
O16999	W03F9.1	2.36459	1.24159	2.49931e-17
Q21770	wago-1,R06C7.1	2.15807	1.10974	3.11056e-30
Q5WRR1	wrk-1,CELE_F41D9.3,F41D9.3	0.001	-1000	na
P91305	xrep-4,CELE_F46F11.6,F46F11.6	1000	1000	na
Q9NAJ4	Y38E10A.17	0.379605	-1.39743	0.00591398
Q9XXC8	Y48A6B.9	1000	1000	na
O18229	Y57G11C.3	2.25119	1.17069	6.28407e-16
Q19404	yap-1,F13E6.4	6.26743	2.64787	3.23918e-05
K8FE02	zbp-1,CELE_M88.5,M88.5	2.92876	1.55029	6.89007e-22
P34594	ZC262.2	0.213788	-2.22575	3.32393e-07
Q18418	zgpa-1,C33H5.17,CELE_C33H5.17	0.281446	-1.82907	2.18792e-08
P34601	ZK1098.2	9.97346	3.31809	0.0402177
P34621	ZK1236.5	1000	1000	na
Q23525	ZK546.14	0.168027	-2.57324	1.68e-23
P30629	ZK637.2	2.68573	1.42532	0.000156197
P30651	ZK643.5	0.248344	-2.00959	1.76935e-20
Q9U3F4	zyx-1,F42G4.3	1000	1000	na

## Sheet: Supplementary Table 4
Supplementary Table 4. List of strains
Strain	Genotype	Gene (s)	Description	Origin
N2	C. elegans wild isolate (Bristol)		Reference C. elegans. Variety Bristol.	From CGC
MHE27	csr-1(gc017[csr-1::3xFLAG::1HA])IV	csr-1	CSR-1 CRISPR-Cas9 3xFLAG::1xHA.	Barucci et al. 2020
MHE54	csr-1(gc027[mCherry::3xflag::1ha::csr-1])IV	csr-1	mCherry knock in by CRISPR-Cas9 in MHE27.	Barucci et al. 2020
MHE69	ieSi64 [gld-1p::TIR1::mRuby::gld-1 3'UTR + Cbr-unc-119(+)] II; csr-1(gc029[degron::mCherry::3xflag::ha::csr-1])	csr-1	Degron knock in by CRISPR-Cas9 in MHE54 and cross with CA1352 (CGC).	Quarato et al. 2020
MHE20	csr-1(tm892)/nT1 [unc-?(n754) let-? qIs51] (IV;V)	csr-1	csr-1(tm892) crossed with nT1[qIs51] (IV;V) balancer. nT1[qIs51] carries an integrated pharyngeal GFP element, and is homozygous inviable; this variant appears to be transferred to male cross progeny more frequently than to hermaphrodite cross progeny. csr-1(tm892) Heterozygotes are Unc and GFP+ with signal in the pharynx. csr-1(tm892) homozygotes are non-Unc, viable, GFP-, and produce 100% dead …	Quarato et al. 2020
MHE21	csr-1(gc010)[D769A]/nT1 [unc-?(n754) let-? qIs51] (IV;V)	csr-1	nT1[qIs51] carries an integrated pharyngeal GFP element, and is homozygous inviable; this variant appears to be transferred to male cross progeny more frequently than to hermaphrodite cross progeny. csr-1(gc010) Heterozygotes are Unc and GFP+ with signal in the pharynx. csr-1(gc010) homozygotes are non-Unc, viable, GFP-, and produce 100% dead embryos.	Barucci et al. 2020
FX1200	hrde-1(tm1200)II	hrde-1		From E. Miska lab
MHE 40	csr-1(gc017[csr-1::3xFLAG::1HA];gc022[D769A]/nT1[unc-?(n754) let-? qIs51] (IV;V)	csr-1	nT1[qIs51] carries an integrated pharyngeal GFP element, and is homozygous inviable; this variant appears to be transferred to male cross progeny more frequently than to hermaphrodite cross progeny. csr-1(gc017;gc022) Heterozygotes are Unc and GFP+ with signal in the pharynx. csr-1(gc017;gc022) homozygotes are non-Unc, viable, GFP-, and produce 100% dead embryos.	this study
HCL125	gfp::prg-1; flag::mcherry::glh-1 I	glh-1 ; prg-1		Heng-Chi Lee lab
MHE129	klp-7(gc047[klp-7 codons optimized]) III	klp-7	Homozygous viable, klp-7 replacement line#32 klp-7_co sequence	This study
MHE130	klp-7(gc048[klp-7 codons optimized]) III	klp-7	Homozygous viable, klp-7 replacement line#42 klp-7_co sequence	This study
MHE155	klp-7(gc047[klp-7_codon_optimised])/hT2 [bli-4(e937) let-?(q782) qIs48]) (I;III).	klp-7	Heterozygote balanced, klp-7 replacement line#32 klp-7_co sequence	This study
YY584	ggSi1[hrde-1p::3xflag::gfp::hrde-1] II	hrde-1	Single insertion on chromosome II	From Kennedy lab, Spracklin et. al. 2017
MHE 82	ggSi1[hrde-1p::3xflag::gfp::hrde-1] II ; csr-1(tm892)/nT1 [unc-?(n754) let-? qIs51] (IV;V)	hrde-1 ; csr-1	Cross between YY584 and MHE20	This study

## Sheet: Supplementary Table 5
Supplementary Table 5. List of guide and repair template sequences used to generate CRISPR-Cas9 alleles
Allele	Description	Target gene	Guide RNA sequence (5'-3') - PAM orientation respect to the target gene	Repair template sequence (5'-3') - ssODN orientation respect to the target gene
klp-7(gc047[klp-7 codons optimized]) III	In frame replacement of klp-7 isoform by a codon optimised sequence by CSRISPR-Cas9	klp-7	Klp-7_crRNA_5’: GCTTGTCGTCGGGATGCATG - sense	gttattattttcagGTAAAATGCTTGTCGTCGGAATGCACGTCGAGATCAAGCGCTCTGACGGACGCATCCACGGAGCCGTCATCGCCGAGGTCAAGTCTAACGGACGCTTCATGGTCGAGTGGTACGAGAAGgtgagtcgcatccttcgagaagAccatcactcgtcacagaatcatgcatttcggatgtgatgccgaaccaaaaatcatgcatttggcattgtgtactttctttcttctcttttttctcttgcaatctttcacattttcagGGAGAGACCAAGGGAAAGGAGTCTTCTCTTGAGGAGCTTCTTACCCTTAACCCATCTCTTCAAGCCCCAAAGCCAACCCCACCACCACAACCACCACAAAAGACCCTTCAAGCCTCTACCGCCGTC…
			Klp-7_crRNA_3': CTCGAACACCCGTGTCGCCG - sense
csr-1(D769A)	codon modification ( GAC > GCA ) at residue 769 of CSR-1 long isoform resulting in a D to A aminoacid change	csr-1	TCTCTCGCAGCGTTTCGGTC - antisense	CTGGAATGAAGTTTCTACCTTCGTAATTGGAATGGCAGTCGCCCAT CCGGATCGCAATGCTGCGAGAGAAGGAAATCCATCCACCGTCGGAGT - sense
				nucleotides in ORANGE : silent mutations in the repair template to prevent Cas9 re-cutting
				nucleotides in BOLD: homology arms
List of oligos used to generate dsDNA templates for in vitro transcription of guide RNAs				nucleotides in RED : modification
Oligo name	Oligo sequence (5'-3')	Target gene	Description
csr-1(D769A)_crRNA_F	GTAATACGACTCACTATAGGTCTCTCGCAGCGTTTCGGTCgttttagagctagaaatagc	csr-1	Use in combination with universal_reverse(AP0905) to generate a template for in vitro transcription of csr-1(D769A) guide RNA
Klp-7_crRNA_5’	GTAATACGACTCACTATAGGGCTTGTCGTCGGGATGCATGgttttagagctagaaatagc	klp-7	Use in combination with universal_reverse(AP0905) to generate a template for in vitro transcription of klp-7 5' guide RNA
Klp-7_crRNA_3'	GTAATACGACTCACTATAGGCTCGAACACCCGTGTCGCCGgttttagagctagaaatagc	klp-7	Use in combination with universal_reverse(AP0905) to generate a template for in vitro transcription of klp-7 3' guide RNA
	nucleotides in BOLD: T7 promoter sequence
	nucleotides in PURPLE : guide RNA sequence
	nucleotides in lower case: sequence homologous to the 3’sequence of the tracrRNA isequence present in AP0905
Oligo pairs used for screening and genotyping edited lines
Oligo name	Oligo sequence (5' - 3')	Target gene	Description
CSR-1(D769A)_ext_F	GTCTCAAGGTGGAAGAAGAG	csr-1	Oligos used to generate a PCR template for restriction by MaeII
CSR-1(D769A)_ext_R	ATCGGCATGTTCCCGTGA	csr-1
Klp-7 genotype Wt F3	GATCGACTATCGTCCGTTGAGC	klp7	oligos specific to WT klp-7 sequence
Klp-7 codon genotype R	gcgggaatcagcaaTCAGAC	klp-7
Klp-7 codon genotype F2	AATCGACTACCGCCCACTTTCT	klp-7_co	oligos specific to klp-7_co sequence
klp-7 3' UTR R3	ggacccgtaaaatattcacaacgagagg	klp-7_co

## Sheet: Supplementary Table 6
Supplementary Table 6. Oligo pairs used for RT-qPCR
Oligo name	Oligo sequence (5' - 3')	target locus
cpg-1 F ex1	GTGGCAATCGACACTGACTG	cpg-1
cpg-1 R ex2	CTCGAGATTCCTCCAGAGCA	cpg-1
puf-5 F	CTCTTTGCTCCACCTCTCTTG	puf-5
puf-5 R	GGACGACATAGTTCCCGTATTG	puf-5
csr-1_F_qPCR	TTCTTACAACAATGAGTGCC	csr-1
csr-1_R_qPCR	TGATATCGACCATCAAGCTG	csr-1
edited klp-7 F	CGACTACCGCCCACTTTCT	klp-7
WT klp-7 F	CGACTATCGTCCGTTGAGC	klp-7
edited klp-7 R	GACGCAGACAGAGATGCGG	klp-7
edited klp-7 R2	GTCGACCTCGGCCTTGGTA	klp-7
WT klp-7 R	AACGCAAACGGAAATCCGA	klp-7
WT klp-7 R2	ATCGACCTCCGCTTTCGTC	klp-7
F glh-4 gene body	CCCACAAGACCTCCATGATAAC	glh-4
R glh-4 gene body	CCATGCATGATCGGGAAGAA	glh-4
ego-1_F	GCTCAGTTGAGATCAATGATGGAA	ego-1
ego-1_R	CCGAAATTCTGTTTCGCATGT	ego-1
F pgl-3 ex7	AAAGATGCCATTCAGTCGTC	pgl-3
R pgl-3 ex7	TTCTCCGCATTTAGTTTCTCC	pgl-3
